# A multiple-trait Bayesian Lasso for genome-enabled analysis and prediction of complex traits

Daniel Gianola<sup>a,b,c,d</sup> and Rohan L. Fernando<sup>c</sup>

<sup>a</sup> Department of Animal Sciences, University of Wisconsin-Madison, USA;

<sup>b</sup> Department of Dairy Science, University of Wisconsin-Madison, USA;

<sup>c</sup> Department of Animal Science, Iowa State University, USA;

<sup>d</sup> Department of Plant Sciences, Technical University of Munich, TUM School of Life Sciences, Germany.

<sup>1</sup>Corresponding author. Email: gianola@ansci.wisc.edu

November 20, 2019

## 1 Abstract

A multiple-trait Bayesian LASSO (MBL) for genome-based analysis and prediction of quantitative traits is presented and applied to two real data sets. The data-generating model is a multivariate linear Bayesian regression on possibly a huge number of molecular markers, and with a Gaussian residual distribution posed. Each (one per marker) of the  $T \times 1$  vectors of regression coefficients ( $T$  : number of traits) is assigned the same  $T$ -variate Laplace prior distribution, with a null mean vector and unknown scale matrix  $\Sigma$ . The multivariate prior reduces to that of the standard univariate Bayesian LASSO when  $T = 1$ . The covariance matrix of the residual distribution is assigned a multivariate Jeffreys prior and  $\Sigma$  is given an inverse-Wishart prior. The unknown quantities in the model are learned using a Markov chain Monte Carlo sampling scheme constructed using a scale-mixture of normal distributions representation. MBL is demonstrated in a bivariate context employing two publicly available data sets using a bivariate genomic best linear unbiased prediction model (GBLUP) for benchmarking results. The first data set is one where wheat grain yields in two different environments are treated as distinct traits. The second data set comes from genotyped *Pinus* trees with each individual was measured for two traits, rust bin and gall volume. In MBL, the bivariate marker effects are shrunk

21 differentially, i.e., "short" vectors are more strongly shrunk towards the origin than in GBLUP;  
22 conversely, "long" vectors are shrunk less. A predictive comparison was carried out as well where,  
23 in wheat, the comparators of MBL were bivariate GBLUP and bivariate Bayes  $C\pi$ , a variable  
24 selection procedure. A training-testing layout was used, with 100 random reconstructions of  
25 training and testing sets. For the wheat data, all methods produced similar predictions. In  
26 *Pinus*, MBL gave better predictions than either a Bayesian bivariate GBLUP or the single trait  
27 Bayesian LASSO. MBL has been implemented in the Julia language package JWAS and is now  
28 available for the scientific community to explore with different traits, species and environments.  
29 It is well known that there is no universally best prediction machine and MBL represents a new  
30 piece in the armamentarium for genome-enabled analysis and prediction of complex traits.

## 31 **2 Introduction**

32 Two main paradigms have been employed for investigating statistical associations between mole-  
33 cular markers and complex traits: marker-by-marker genome-wide association studies (GWAS)  
34 and whole-genome regression approaches (WGR). GWAS is dominant in human genetics; Viss-  
35 cher et al. (2017) present a perspective and Gianola et al. (2016) formulate a statistically  
36 orientated critique. WGR was developed mostly in animal and plant breeding (e.g., Lande and  
37 Thompson 1990; Meuwissen et al. 2001; Gianola et al. 2003) primarily for predicting future  
38 performance, but it has received some attention in human genetics as well (e.g., Lee et al. 2011;  
39 Yang et al. 2010; de los Campos et al. 2011; Makowsky et al. 2011; López de Maturana et al.  
40 2014). de los Campos et al. (2013), Gianola (2013) and Isik et al. (2017) reviewed an extensive  
41 collection of WGR approaches. Other studies noted that WGR can be used both for "discovery"  
42 of associations and for prediction (Moser et al. 2015; Goddard et al. 2016; Fernando et al.  
43 2017). Hence, WGR methodology is an active area of research.

44 Multiple-trait analysis has been of great interest in plant and animal breeding for a long-  
45 time, mainly from the point of view of joint selection for many traits (Smith 1936; Hazel 1943;  
46 Walsh and Lynch 2018). Henderson and Quaas (1976) developed multi-trait best linear unbiased  
47 prediction of breeding values for all individuals and traits measured in a population of animals,  
48 a methodology that gradually became routine in the field. For example, Gao et al. (2018),  
49 described an application of a 9-variate model to data representing close to seven million and  
50 four million Holstein and Nordic Red cattle, respectively; the nine traits were milk, fat and  
51 protein yields in each of the first three lactations of the cows.

52 A multiple-trait analysis is also a natural choice in quests for understanding and dissecting  
53 genetic correlations between traits using molecular markers, e.g., evaluating whether pleiotropy  
54 or linkage disequilibrium are at the roots of between-trait associations (Gianola et al. 2015;  
55 Cheng et al. 2018a). For instance, Galesloot et al. (2014) compared six methods of multivariate

56 GWAS via simulation and found that all delivered a higher power than single-trait GWAS,  
57 even when genetic correlations were weak. Many single-trait WGR methods extend directly to  
58 the multiple-trait domain, e.g., genomic best linear unbiased prediction (GBLUP; Van Raden  
59 2007). Other procedures such as Bayesian mixture models are more involved, but extensions  
60 are available (Calus and Veerkamp 2011; Jia and Jannink 2012; Cheng et al. 2018a). The  
61 mixture model of Cheng et al. (2018a) is particularly interesting because it provides insight into  
62 whether markers affect all, some or none of the traits addressed. For example, the proportion of  
63 markers in each of the (0, 0), (0, 1), (1, 0) and (1, 1) categories, where (0, 0) means "no effect"  
64 and (1, 1) denotes "effect" on each of two disease traits in *Pinus taeda* was estimated by Cheng  
65 et al. (2018a) using SNPs (single nucleotide polymorphisms). The proportion of MCMC samples  
66 falling into the (1, 1) class was less than 3%, with about 140 markers appearing as candidates for  
67 further scrutiny of pleiotropy; 97% of the SNP were in the (0, 0) class and 0.5% were in the (0, 1)  
68 and (1, 0) classes. It must be noted that Cheng et al. (2018a) used Bayesian model averaging,  
69 so posterior estimates of effects and of their uncertainties constitute averages over all possible  
70 configurations. The resulting "average model" is not truly sparse as Bayesian mixture models  
71 always assign some posterior probability to each of the possible configurations. An alternative  
72 to a mixture is to use a prior distribution that produces strong shrinkage towards the origin of  
73 "weak" vectors of marker effects; here, each marker has a vector with dimension equal to the  
74 number of traits.

75 The LASSO (least absolute shrinkage and selection operator) presented by Tibshirani (1996)  
76 is a single-response method based on minimizing a linear regression residual sum of squares  
77 subject to a constraint based on an  $L_1$  norm. It can produce a sparse model, i.e., if the linear  
78 regression model has  $p$  regression coefficients, the LASSO yields a smaller model (i.e., model  
79 selection) but with a complexity that cannot exceed  $N$ , the number of observations. Tibshirani  
80 (1996) noted that the LASSO solutions can also be obtained by calculating the mode of the  
81 conditional posterior distribution of the regression coefficients in a Bayesian model in which  
82 each coefficient is assigned the same conditional double exponential or Laplace prior. Using a  
83 ridge regression reformulation of LASSO, it can be seen (Tibshirani 1996; Gianola 2013) that its  
84 Bayesian version shrinks small-value regression coefficients very strongly towards zero, whereas  
85 large-effect variants are regularized to a much lesser extent than in ridge regression. Yuan and  
86 Lin (2006) and Yuan et al. (2007) considered the problem of clustering regression coefficients into  
87 groups (factors), with the focus becoming factor selection, as opposed to the predictor variable  
88 selection that takes place in LASSO. For instance, a cluster could consist of a group of markers in  
89 tight physical linkage. These authors noted that, in some instances, grouping enhances prediction  
90 performance over ridge regression, while in others, it does not. Such finding is consistent with  
91 knowledge accumulated in close to two decades of experience with genome-enabled prediction in  
92 animal breeding: there is no universally best prediction machine. A multiple-trait application

93 of a LASSO penalty on regression coefficients was presented by Li et al. (2015). These authors  
94 assigned a multivariate Laplace distribution to the model residuals and a group-LASSO penalty  
95 (Yuan and Lin 2006) to the regression coefficients. The procedure differs from Tibshirani's  
96 LASSO in that the model selects vectors of regressors (corresponding to regressions of a given  
97 marker over traits) as opposed to single-trait predictor variables.

98 Park and Casella (2008) introduced a fully Bayesian LASSO (BL). Contrary to LASSO, BL  
99 produces a model where all regression coefficients are non-null (even if  $p > N$ ); most regressions  
100 are often tiny in value, except those associated with covariates (markers) with strong effects.  
101 In short, LASSO produces a sparse model whereas BL yields an effectively sparse specification,  
102 similar to Bayesian mixture models such as Bayes B (Meuwissen et al. 2001). The first application  
103 of the BL in quantitative genetics was made by Yi and Xu (2008) in the context of quantitative  
104 trait locus (QTL) mapping, with subsequent applications in de los Campos et al. (2009), Legarra  
105 et al. (2011), Li et al. (2011) and Lehermeier et al. (2013).

106 It appears that a multiple-trait generalization of the BL has not been reported hereto. The  
107 present paper describes a multi-trait Bayesian LASSO (MBL) model based on adopting a mul-  
108 tivariate Laplace distribution with unknown scale matrix as prior distribution for the markers  
109 or variants under scrutiny. The MBL is introduced and compared with a multiple-trait GBLUP  
110 (MTGBLUP) using wheat and pine tree data sets. Section "The multi-trait regression model"  
111 describes MBL, including a Markov chain Monte Carlo sampling algorithm. Subsequently, MBL  
112 is compared with MTGBLUP using a wheat data set. Finally, bivariate MBL and bivariate  
113 MTGBLUP are contrasted from a predictive perspective, showing a better performance of MBL  
114 over BLUP and over a single-trait Bayesian LASSO specification, corroborating the usefulness  
115 of multiple-trait analyses. The paper concludes with a general discussion and technical details  
116 are presented in Appendices.

### 117 **3 The multi-trait regression model**

118 Assume there are  $T$  traits observed in each of  $N$  individuals and let  $\beta_j = \{\beta_{jt}\}$  be a  $T \times 1$  vector  
119 of allelic substitution effects at marker  $j = 1, 2, \dots, p$ , with  $\beta_{jt}$  representing the effect of marker  
120  $j$  on trait  $t$  ( $t = 1, 2, \dots, T$ ). The multi-trait regression model (assuming no nuisance location  
121 effects other than a mean) for the  $T$  responses is

$$122 \quad \mathbf{y}_i = \boldsymbol{\mu} + \sum_{j=1}^p x_{ij} \beta_j + \mathbf{e}_i; \quad i = 1, 2, \dots, N; \quad j = 1, 2, \dots, p, \quad (1)$$

123 where  $\mathbf{y}_i$  is a  $T \times 1$  vector of responses observed in individual  $i$ ;  $\boldsymbol{\mu} = \{\mu_t\}$  is the vector of trait  
124 means and  $x_{ij}$  is the genotype individual  $i$  possesses at marker locus  $j$ . The residual vector

125  $\mathbf{e}_i$  ( $T \times 1$ ) is assumed to follow the Gaussian distribution  $\mathbf{e}_i | \mathbf{R}_0 \sim N(0, \mathbf{R}_0)$ , where  $\mathbf{R}_0$  is a  
 126  $T \times T$  covariance matrix. All  $\mathbf{e}_i$  vectors are assumed to be mutually independent and identically  
 127 distributed.

128 If traits are sorted within individuals, the probability model associated with (1) can be  
 129 represented as

$$\begin{aligned}
 & p(\mathbf{y}_1, \mathbf{y}_2, \dots, \mathbf{y}_N | \boldsymbol{\mu}, \boldsymbol{\beta}_1, \boldsymbol{\beta}_2, \dots, \boldsymbol{\beta}_p, \mathbf{R}_0) \\
 & \propto \frac{1}{|\mathbf{R}_0|^{\frac{N}{2}}} \exp \left[ -\frac{1}{2} \sum_{i=1}^N \left( \mathbf{y}_i - \boldsymbol{\mu} - \sum_{j=1}^p x_{ij} \boldsymbol{\beta}_j \right)' \mathbf{R}_0^{-1} \left( \mathbf{y}_i - \boldsymbol{\mu} - \sum_{j=1}^p x_{ij} \boldsymbol{\beta}_j \right) \right] \\
 & \propto \frac{1}{|\mathbf{R}_0|^{\frac{N}{2}}} \exp \left\{ -\frac{1}{2} \text{tr} \left[ \mathbf{R}_0^{-1} \mathbf{S}_e \right] \right\}, \tag{2}
 \end{aligned}$$

133 where

$$\mathbf{S}_e = \sum_{i=1}^N \left( \mathbf{y}_i - \boldsymbol{\mu} - \sum_{j=1}^p x_{ij} \boldsymbol{\beta}_j \right) \left( \mathbf{y}_i - \boldsymbol{\mu} - \sum_{j=1}^p x_{ij} \boldsymbol{\beta}_j \right)' \tag{3}$$

135 is a  $T \times T$  matrix of sums of squares and products of the unobserved regression residuals.

136 The regression model can be formulated in an equivalent manner by sorting individuals within  
 137 traits; we will use  $T = 3$  hereinafter. Let  $\mathbf{y}_1^*$ ,  $\mathbf{y}_2^*$  and  $\mathbf{y}_3^*$  be response vectors of order  $N$  each  
 138 observed for traits 1, 2, and 3, respectively. The representation of the model is

$$\begin{aligned}
 \begin{bmatrix} \mathbf{y}_1^* \\ \mathbf{y}_2^* \\ \mathbf{y}_3^* \end{bmatrix} &= \begin{bmatrix} \mathbf{1}_N & 0 & 0 \\ 0 & \mathbf{1}_N & 0 \\ 0 & 0 & \mathbf{1}_N \end{bmatrix} \begin{bmatrix} \mu_1 \\ \mu_2 \\ \mu_3 \end{bmatrix} + \begin{bmatrix} \mathbf{X} & 0 & 0 \\ 0 & \mathbf{X} & 0 \\ 0 & 0 & \mathbf{X} \end{bmatrix} \begin{bmatrix} \boldsymbol{\beta}_1^* \\ \boldsymbol{\beta}_2^* \\ \boldsymbol{\beta}_3^* \end{bmatrix} + \begin{bmatrix} \mathbf{e}_1^* \\ \mathbf{e}_2^* \\ \mathbf{e}_3^* \end{bmatrix} \\
 &= (\mathbf{I}_3 \otimes \mathbf{1}_N) \boldsymbol{\mu} + (\mathbf{I}_3 \otimes \mathbf{X}) \boldsymbol{\beta}^* + \mathbf{e}^*, \tag{4}
 \end{aligned}$$

141 where  $\mathbf{1}_N$  is an  $N \times 1$  vector of 1's,  $\mathbf{X} = \{x_{ij}\}$  is an  $N \times p$  matrix of marker genotypes, and  
 142  $\boldsymbol{\beta}_t^*$  ( $p \times 1$ ) and  $\mathbf{e}_t^*$  ( $N \times 1$ ) are vectors of regression coefficients and of residuals for trait  $t$ ,  
 143 respectively. Above,  $\boldsymbol{\beta}^* = \text{vec}(\boldsymbol{\beta}_1^*, \boldsymbol{\beta}_2^*, \boldsymbol{\beta}_3^*)$  is a  $3p \times 1$  vector and  $\mathbf{e}^* = \text{vec}(\mathbf{e}_1^*, \mathbf{e}_2^*, \mathbf{e}_3^*)$  has dimension  
 144  $3N \times 1$ . Note that  $\text{Var}(\mathbf{e}^*) = \mathbf{R}_0 \otimes \mathbf{I} = \mathbf{R}$ . Putting  $\bar{\mathbf{y}}^*(\boldsymbol{\mu}, \boldsymbol{\beta}^*) = (\mathbf{I}_3 \otimes \mathbf{1}_N) \boldsymbol{\mu} + (\mathbf{I}_3 \otimes \mathbf{X}) \boldsymbol{\beta}^*$ , the  
 145 probability model is

$$p(\mathbf{y}^* | \boldsymbol{\mu}, \boldsymbol{\beta}^*, \mathbf{R}_0) \propto \frac{1}{|\mathbf{R}_0|^{\frac{N}{2}}} \exp \left[ -\frac{1}{2} (\mathbf{y}^* - \bar{\mathbf{y}}^*(\boldsymbol{\mu}, \boldsymbol{\beta}^*))' \mathbf{R}_0^{-1} (\mathbf{y}^* - \bar{\mathbf{y}}^*(\boldsymbol{\mu}, \boldsymbol{\beta}^*)) \right]. \tag{5}$$

147 We will work with either (1) or (4), depending on the context.

## 148 3.1 Bayesian prior assumptions

### 149 3.1.1 Parameters $\boldsymbol{\mu}$ and $\mathbf{R}_0$

150 The vector  $\boldsymbol{\mu}$  will be assigned a "flat" improper prior and Jeffreys non-informative prior (e.g.,  
151 Sorensen and Gianola, 2002) will be adopted for  $\mathbf{R}_0$  so that their joint prior density is

$$152 \quad p(\boldsymbol{\mu}, \mathbf{R}_0) \propto |\mathbf{R}_0|^{-\left(\frac{T+1}{2}\right)}. \quad (6)$$

### 153 3.1.2 Multivariate Laplace prior distribution (MLAP) for marker effects

154 The same  $T$ -variate Laplace prior distribution with a null mean vector will be assigned to each  
155 of the  $T \times 1$  vectors  $\boldsymbol{\beta}_j$  ( $j = 1, 2, \dots, p$ ), assumed mutually independent, *a priori*. Gómez et al.  
156 (2007) presented a multi-dimensional version of the power exponential family of distributions;  
157 one special case is the multivariate Laplace distribution (MLAP). The density of the MLAP  
158 with a zero-mean vector used here is

$$159 \quad p(\boldsymbol{\beta}_j | \boldsymbol{\Sigma}) = \frac{T \Gamma\left(\frac{T}{2}\right)}{|\boldsymbol{\Sigma}|^{\frac{1}{2}} \pi^{\frac{T}{2}} \Gamma(1+T) 2^{(1+T)}} \exp\left(-\frac{1}{2} \sqrt{\boldsymbol{\beta}'_j \boldsymbol{\Sigma}^{-1} \boldsymbol{\beta}_j}\right); \quad j = 1, 2, \dots, p, \quad (7)$$

160 where  $\boldsymbol{\Sigma} = \{\Sigma_{tt'}\}$  is a  $T \times T$  positive-definite scale matrix. The variance-covariance matrix of  
161 MLAP is

$$162 \quad \text{Var}(\boldsymbol{\beta}_j | \boldsymbol{\Sigma}) = 4(T+1) \boldsymbol{\Sigma} = \mathbf{B}; \quad (8)$$

163 note that the absolute values of the elements of  $\mathbf{B}$ , the inter-trait variance-covariance of marker  
164 effects, are larger than those of  $\boldsymbol{\Sigma}$ . Hence,  $\beta_{jt} \sim (0, \sigma_{\beta,t}^2)$  for  $\forall j$ , where  $\sigma_{\beta,t}^2 = 4(T+1) \Sigma_{tt}$  is the  
165 appropriate diagonal element of  $\mathbf{B}$ ; likewise,  $\sigma_{\beta,tt'} = 4(T+1) \Sigma_{tt'}$  is the covariance of marker  
166 effects between traits  $t$  and  $t'$ , for all  $j$ . Putting  $T = 1$  in (7) yields

$$167 \quad p(\beta | \Sigma) = \frac{1}{2\sqrt{4\Sigma}} \exp\left(-\frac{|\beta|}{\sqrt{4\Sigma}}\right). \quad (9)$$

168 The preceding is the density of a double exponential (DE) distribution with null mean, parameter  
169  $\sqrt{4\Sigma}$  and variance  $\text{Var}(\beta) = 8\Sigma$ . As mentioned earlier, Tibshirani (1996) and Park and Casella  
170 (2008) used the DE distribution as conditional (given  $\Sigma$ ) prior for regression coefficients in the  
171 BL, a member of the "Bayesian Alphabet" (Gianola et al. 2009). Gianola et al. (2018) assigned  
172 the DE distribution to residuals of a linear model for the purpose of attenuating outliers and Li  
173 et al. (2015) used the MLAP distribution for the residuals in a "robust" linear regression model  
174 for QTL mapping.

175 MLAP is therefore an interesting candidate prior for multi-trait marker effects in a multiple  
176 trait generalization of the Bayesian LASSO (MBL). A zero-mean MLAP distribution has a

177 sharp peak at the 0 coordinates. Although when  $T = 1$  MLAP reduces to a DE distribution,  
 178 the marginal and conditional densities of MLAP are not DE. Gómez et al. (2007) showed that  
 179 such densities are elliptically contoured, and thus not DE. Appendix A and Figures S1-S3 in the  
 180 Supplemental material give background on MLAP.

181 Gómez-Sánchez-Manzano et al. (2008) showed that MLAP can be represented as a scaled  
 182 mixture of normal distributions under the hierarchy: 1)  $[\beta_j | \Sigma, v_j^2] = N_T(\mathbf{0}, v_j^2 \Sigma)$ , and 2)  $v_j^2 \sim$   
 183  $Gamma\left(\frac{T+1}{2}, \frac{1}{8}\right)$  for  $j = 1, 2, \dots, p$ ;  $N_T(\mathbf{0}, \Sigma v_j^2)$  denotes a  $T$ -variate normal distribution  
 184 with null mean and covariance matrix  $\Sigma v_j^2$ . The density of  $v_j^2$  is

$$185 \quad h(v_j^2) \propto (v_j^2)^{\frac{T+1}{2}-1} \exp\left(-\frac{v_j^2}{8}\right). \quad (10)$$

186 Let the collection of all marker effects over traits be represented by the  $Tp \times 1$  vector

$$187 \quad \beta = \left[ \beta'_1 \quad \beta'_2 \quad \dots \quad \beta'_p \right]'. \quad (11)$$

188 If independent and identical MLAP prior distributions are assigned to each of the sub-vectors,  
 189 the joint prior density of all marker effects, given  $\Sigma$ , can be represented as

$$190 \quad p(\beta | \Sigma) = \prod_{j=1}^p p(\beta_j | \Sigma)$$

$$191 \quad = \prod_{j=1}^p \int_0^\infty N_T(\beta_j | 0, \Sigma v_j^2) h(v_j^2) dv_j^2, \quad (12)$$

192 and the joint density of  $\beta$  and  $\mathbf{v}^2 = \left[ v_1^2 \quad v_2^2 \quad \dots \quad v_p^2 \right]'$  is

$$193 \quad p(\beta, \mathbf{v}^2 | \Sigma) = \prod_{j=1}^p N_T(0, \Sigma v_j^2) h(v_j^2). \quad (13)$$

194 When individuals are sorted within traits (e.g.,  $T = 3$ ), note that  $[\beta^* | \Sigma, \mathbf{v}^2]$  is a  $Tp$ -dimensional  
 195 normal distribution with null mean vector and covariance matrix

$$196 \quad Var\left(\begin{bmatrix} \beta_1^* \\ \beta_2^* \\ \beta_3^* \end{bmatrix} \middle| \Sigma, \mathbf{v}^2\right) = \begin{bmatrix} \mathbf{D}\Sigma_{11} & \mathbf{D}\Sigma_{12} & \mathbf{D}\Sigma_{13} \\ \mathbf{D}\Sigma_{21} & \mathbf{D}\Sigma_{22} & \mathbf{D}\Sigma_{23} \\ \mathbf{D}\Sigma_{31} & \mathbf{D}\Sigma_{32} & \mathbf{D}\Sigma_{33} \end{bmatrix} = \Sigma \otimes \mathbf{D}, \quad (14)$$

197 where  $\mathbf{D} = \text{diag}(v_1^2, v_2^2, \dots, v_p^2)$  is a diagonal matrix. Hence,

$$198 \quad p(\boldsymbol{\beta}^* | \boldsymbol{\Sigma}, \mathbf{v}^2) \propto \exp \left[ -\frac{1}{2} \boldsymbol{\beta}^{*'} (\boldsymbol{\Sigma}^{-1} \otimes \mathbf{D}^{-1}) \boldsymbol{\beta}^* \right]. \quad (15)$$

### 199 3.1.3 Scale matrix $\boldsymbol{\Sigma}$

200 The scale matrix  $\boldsymbol{\Sigma}$  of MLAP can be given a fixed value (becoming a hyper-parameter) or  
 201 inferred, in which case a prior distribution is needed. Here, an inverse-Wishart (*IW*) distribution  
 202 with scale matrix  $\boldsymbol{\Omega}_\beta$  and  $\nu_\beta$  degrees of freedom will be assigned as prior. The density is

$$203 \quad p(\boldsymbol{\Sigma} | \boldsymbol{\Omega}_\beta, \nu_\beta) \propto |\boldsymbol{\Sigma}|^{-\left(\frac{T + \nu_\beta + 1}{2}\right)} \exp \left[ -\frac{1}{2} \text{tr}(\boldsymbol{\Sigma}^{-1} \boldsymbol{\Omega}_\beta) \right]. \quad (16)$$

## 204 3.2 Joint posterior and fully-conditional distributions

205 The joint posterior distribution, including  $\mathbf{v}^2 = \{v_j^2\}$  from the scale-mixture of normals repre-  
 206 sentation of the prior distribution of  $\boldsymbol{\beta}$ , was assumed to take the form

$$207 \quad p(\boldsymbol{\mu}, \boldsymbol{\beta}^*, \mathbf{R}_0, \boldsymbol{\Sigma}, \mathbf{v}^2 | \mathbf{y}^*, H) \propto p(\mathbf{y}^* | \boldsymbol{\mu}, \boldsymbol{\beta}^*, \mathbf{R}_0) p(\mathbf{R}_0 | H) p(\boldsymbol{\beta}^* | \boldsymbol{\Sigma}, \mathbf{v}^2) p(\mathbf{v}^2) p(\boldsymbol{\Sigma} | H), \quad (17)$$

208 where  $H$  denotes the hyper-parameters; recall that  $\mathbf{y}^*$  is the data vector sorted by individuals  
 209 within trait The fully conditional distributions are presented below, with *ELSE* used to denote  
 210 all parameters that are kept fixed, together with  $H$ , in a specific conditional distribution.

### 211 3.2.1 Parameters $\boldsymbol{\mu}$ and $\boldsymbol{\beta}^*$ given *ELSE*

212 From (17) and using representations (4) and (15), the fully conditional posterior distribution of  
 213  $\boldsymbol{\mu}$  and  $\boldsymbol{\beta}^*$  has density

$$214 \quad p(\boldsymbol{\mu}, \boldsymbol{\beta}^* | \text{ELSE}) \propto p(\mathbf{y}^* | \boldsymbol{\mu}, \boldsymbol{\beta}^*, \mathbf{R}_0) p(\boldsymbol{\beta}^* | \boldsymbol{\Sigma}, \mathbf{v}^2) \\
 215 \quad \propto \exp \left[ -\frac{1}{2} (\mathbf{y}^* - \bar{\mathbf{y}}^*(\boldsymbol{\mu}, \boldsymbol{\beta}^*))' \mathbf{R}^{-1} (\mathbf{y}^* - \bar{\mathbf{y}}^*(\boldsymbol{\mu}, \boldsymbol{\beta}^*)) \right] \\
 216 \quad \times \exp \left[ -\frac{1}{2} \boldsymbol{\beta}^{*'} (\boldsymbol{\Sigma}^{-1} \otimes \mathbf{D}^{-1}) \boldsymbol{\beta}^* \right]. \quad (18)$$

217 The preceding is a multivariate normal density (e.g., Sorensen and Gianola 2002). The mean  
 218 vector of the distribution is

$$219 \quad \begin{bmatrix} \bar{\boldsymbol{\mu}} \\ \bar{\boldsymbol{\beta}}^* \end{bmatrix} = \begin{bmatrix} \mathbf{R}_0^{-1} N & \mathbf{R}_0^{-1} \otimes \mathbf{1}'_N \mathbf{X} \\ \mathbf{R}_0^{-1} \otimes \mathbf{X}' \mathbf{1}_N & \mathbf{R}_0^{-1} \otimes \mathbf{X}' \mathbf{X} + \boldsymbol{\Sigma}^{-1} \otimes \mathbf{D}^{-1} \end{bmatrix}^{-1} \begin{bmatrix} (\mathbf{R}_0^{-1} \otimes \mathbf{1}'_N) \mathbf{y}^* \\ (\mathbf{R}_0^{-1} \otimes \mathbf{X}')' \mathbf{y}^* \end{bmatrix}, \quad (19)$$



220 and the variance-covariance matrix is

$$221 \quad \text{Var} \left( \begin{bmatrix} \boldsymbol{\mu} \\ \boldsymbol{\beta} \end{bmatrix} | ELSE \right) = \begin{bmatrix} \mathbf{R}_0^{-1} N & \mathbf{R}_0^{-1} \otimes \mathbf{1}'_N \mathbf{X} \\ \mathbf{R}_0^{-1} \otimes \mathbf{X}' \mathbf{1}_N & \mathbf{R}_0^{-1} \otimes \mathbf{X}' \mathbf{X} + \boldsymbol{\Sigma}^{-1} \otimes \mathbf{D}^{-1} \end{bmatrix}^{-1} = \mathbf{C}^{-1}. \quad (20)$$

222 A more explicit representation is presented in Appendix B for the case  $T = 3$ .

### 223 3.2.2 Fully conditional distributions of partitions of the location vector

224 For details, see Van Tassell and Van Vleck (1996) and Sorensen and Gianola (2002). Since  
225 the joint posterior of the location parameters, given  $\boldsymbol{\Sigma}$ ,  $\mathbf{v}^2$  and  $\mathbf{R}_0$ , is multivariate normal, all  
226 conditionals and linear combinations thereof are normal as well. In particular ( $T = 3$ ),

$$227 \quad E(\mu_t | ELSE) = \frac{1}{r^{tt} N} \left[ \mathbf{1}'_N \sum_{t'=1}^3 r^{tt'} (\mathbf{y}_t^* - \mathbf{X} \boldsymbol{\beta} t) - N \sum_{t' \neq t} r^{tt'} \mu_{t'} \right]; \quad i = 1, 2, 3, \quad (21)$$

228 and

$$229 \quad \text{Var}(\mu_t | ELSE) = \frac{1}{r^{tt} N}; \quad t = 1, 2, 3. \quad (22)$$

Likewise

$$\begin{aligned} E(\boldsymbol{\beta}_t^* | ELSE) &= \left( r^{tt} \mathbf{X}' \mathbf{X} + \frac{\mathbf{D}^{-1}}{\Sigma^{tt}} \right)^{-1} \\ &\times \left[ \mathbf{X}' \sum_{t'=1}^3 r^{tt'} (\mathbf{y}_j^* - \mathbf{1}_N \mu_j) - \sum_{t' \neq t} \left( r^{tt'} \mathbf{X}' \mathbf{X} + \frac{\mathbf{D}^{-1}}{\Sigma^{tt'}} \right) \boldsymbol{\beta}_{t'}^* \right]; \quad i = 1, 2, 3, \end{aligned} \quad (23)$$

230 and

$$231 \quad \text{Var}(\boldsymbol{\beta}_t^* | ELSE) = \left( r^{tt} \mathbf{X}' \mathbf{X} + \frac{\mathbf{D}^{-1}}{\Sigma^{tt}} \right)^{-1}; \quad t = 1, 2, 3. \quad (24)$$

### 232 3.2.3 Fully conditional distributions of $\mathbf{R}_0$ and $\boldsymbol{\Sigma}$

233 From (17) using (2) and (6)

$$234 \quad p(\mathbf{R}_0 | ELSE) \propto |\mathbf{R}_0|^{-\left(\frac{N+T+1}{2}\right)} \exp \left\{ -\frac{1}{2} tr \left[ \mathbf{R}_0^{-1} \mathbf{S}_e \right] \right\}, \quad (25)$$

235 so  $[\mathbf{R}_0 | ELSE]$  is an *IW* distribution with  $N + T$  degrees of freedom and scale matrix  $\mathbf{S}_e$ . In  
236 *IW*, the kernel of the density is often written as  $\exp \left\{ -\frac{1}{2} tr \left[ \mathbf{R}_0^{-1} (N + T) \bar{\mathbf{S}}_e \right] \right\}$ , where  $\bar{\mathbf{S}}_e =$   
237  $\mathbf{S}_e / (N + T)$ .

238 Recall that

$$239 \quad p(\boldsymbol{\beta}^* | \boldsymbol{\Sigma}, \mathbf{v}^2) = \prod_{j=1}^p N_T(\boldsymbol{\beta}_j | 0, \boldsymbol{\Sigma} v_j^2), \quad (26)$$

240 so from (17)

$$\begin{aligned} 241 \quad p(\boldsymbol{\Sigma} | ELSE) &\propto p(\boldsymbol{\beta}^* | \boldsymbol{\Sigma}, \mathbf{v}^2) p(\boldsymbol{\Sigma} | H) \\ 242 &\propto \prod_{j=1}^p \frac{1}{|\boldsymbol{\Sigma} v_j^2|^{\frac{1}{2}}} \exp\left[-\frac{1}{2} \boldsymbol{\beta}'_j \left(\frac{\boldsymbol{\Sigma}^{-1}}{v_j^2}\right) \boldsymbol{\beta}_j\right] \\ 243 &\quad \times |\boldsymbol{\Sigma}|^{-\left(\frac{T + \nu_\beta + 1}{2}\right)} \exp\left[-\frac{1}{2} \text{tr}(\boldsymbol{\Sigma}^{-1} \Omega_\beta)\right] \\ 244 &\propto |\boldsymbol{\Sigma}|^{-\left(\frac{p + T + \nu_\beta + 1}{2}\right)} \exp\left\{-\frac{1}{2} \text{tr}[\boldsymbol{\Sigma}^{-1} \mathbf{S}_\beta]\right\}, \quad (27) \end{aligned}$$

245 where

$$246 \quad \mathbf{S}_\beta = \sum_{j=1}^p \left(\frac{\boldsymbol{\beta}_j \boldsymbol{\beta}'_j}{v_j^2}\right) + \Omega_\beta \quad (28)$$

247 is a  $T \times T$  matrix. Hence the conditional posterior distribution of  $\boldsymbol{\Sigma}$  is  $IW(p + T + \nu_\beta, \mathbf{S}_\beta)$ .  
 248 The kernel of the density of  $\boldsymbol{\Sigma}$  is often represented as  $\exp\left\{-\frac{1}{2} \text{tr}[\boldsymbol{\Sigma}_0^{-1} (p + T + \nu_\beta) \bar{\mathbf{S}}_\beta]\right\}$ , where  
 249  $\bar{\mathbf{S}}_\beta = \mathbf{S}_\beta / (p + T + \nu_\beta)$ .

### 250 3.2.4 Fully conditional distribution of $\mathbf{v}^2$

251 From (17) and using (13)

$$\begin{aligned} 252 \quad p(\mathbf{v}^2 | ELSE) &\propto p(\boldsymbol{\beta}^* | \boldsymbol{\Sigma}, \mathbf{v}^2) p(\mathbf{v}^2) \\ 253 &\propto \prod_{j=1}^p N_T(\boldsymbol{\beta}_j | 0, \boldsymbol{\Sigma} v_j^2) h(v_j^2) \\ 254 &\propto \prod_{j=1}^p \frac{1}{(v_j^2)^{\frac{T}{2}}} \exp\left[-\frac{\boldsymbol{\beta}'_j \boldsymbol{\Sigma}^{-1} \boldsymbol{\beta}_j}{2v_j^2}\right] (v_j^2)^{\frac{T+1}{2}-1} \exp\left(-\frac{v_j^2}{8}\right) \\ 255 &\propto \prod_{j=1}^p (v_j^2)^{-\frac{1}{2}} \exp\left[-\frac{\boldsymbol{\beta}'_j \boldsymbol{\Sigma}^{-1} \boldsymbol{\beta}_j + \frac{v_j^4}{4}}{2v_j^2}\right]. \quad (29) \end{aligned}$$

256 The preceding density is not in a recognizable form. Appendix C gives details of a Metropolis-  
 257 Hastings algorithm tailored for making draws from the distribution having density (29). A brief  
 258 description of the procedure follows.

### 259 3.3 MCMC algorithm

- 260 • Starting values for  $\mathbf{R}_0$  and  $\Sigma$  can be obtained "externally" from some estimates of  $\mathbf{R}_0$   
261 and  $\mathbf{B}$  (the  $T \times T$  matrix of variances and covariances of marker effects) calculated with  
262 standard methods such as maximum likelihood. Recall that  $\Sigma = \mathbf{B}/[4(T + 1)]$ .
- 263 • Sample each  $v_j^2$  ( $j = 1, 2, \dots, p$ ) using the following Metropolis-Hastings sampler:
  - 264 1. At round  $t$ , draw  $y$  from  $Y \sim IG(\alpha = \frac{1}{2}, \beta = \frac{1}{4})$  and evaluate  $y$  as proposal;  $IG$   
265 stands for an inverse-gamma distribution.
  - 266 2. Draw  $U \sim U(0, 1)$ , with the probability of move being  $\min(1, R)$ , with  $R$  as in  
267 Appendix C.
  - 268 3. If  $U < R$ , set  $w_j^{[t+1]} = y$  and form  $v_j^{2[t+1]} = 2/w_j^{[t]}$  as a new state. Otherwise, set  
269  $v_j^{2[t+1]} = v_j^{2[t]}$ ;  $j = 1, 2, \dots, p$ .
- 270 • In a "single-pass" sampler, use (19) and (20) for sampling the entire location vector jointly.  
271 Otherwise, adopt a blocking strategy; for example draw  $\boldsymbol{\mu}$  and  $\boldsymbol{\beta}^*$  using (21), (22), (23)  
272 and (24).
- 273 • Sample  $\mathbf{R}_0$  from  $IW(N + T, \mathbf{S}_e)$  and  $\Sigma$  from  $IW(p + T + \nu_\beta, \mathbf{S}_\beta)$ .

### 274 3.4 Remarks

275 Appendix E shows that the degree of shrinkage of marker effects results from a joint action  
276 between  $\Sigma$  and the strength of marker effects. A vector of effects of a marker with a short  
277 Mahalanobis distance away from  $\mathbf{0}$  is more strongly shrunk towards the origin (i.e., the mean of  
278 prior distribution) than vectors containing strong effects on at least one trait. MLAP preserves  
279 the spirit of BL, producing "pseudo-selection" of covariates: all markers stay in the model, but  
280 some are effectively nullified. A marker with strong marginal and joint effects on the traits under  
281 consideration could flag potentially pleiotropic regions.

### 282 3.5 Missing records for some traits

283 Often, not all traits are measured in all individuals, a situation that is more common in animal  
284 breeding than in plant breeding. A standard approach ("data augmentation") treats missing  
285 phenotypes as unknowns in an expanded joint posterior distribution. As shown in Appendix F,  
286 a predictive distribution can be used to produce an imputation of missing data.

## 287 4 Alternative formulation in $TN$ dimensions

288 The MCMC sampler described above is based on a regression on markers formulation stemming  
289 from either (1) or (4). In a "single-pass" sampler,  $T(1+p)$  parameters must be drawn together;  
290 when  $p$  is very large, direct inversion is typically unfeasible so the scheme must be reformulated  
291 into a "block-sampling" one, i.e., by drawing some of the location parameters jointly by condi-  
292 tioning on the other location parameters, or by using a single-site sampler (Sorensen and Gianola  
293 2002). Blocking or single-site sampling facilitate computation at the expense of slowing down  
294 convergence to the target distribution. Appendix D gives a scheme in which  $T(1+N)$  effects  
295 (trait means and bivariate genomic breeding values) are inferred, and the  $Tp$  marker effects are  
296 calculated indirectly, following ideas of Henderson (1977) and adapted by Goddard (2009) to a  
297 genome-based model.

## 298 5 Data availability statement

299 The wheat yield data set in the R package BGLR (Pérez and de los Campos 2014) was employed  
300 to contrast MBL with GBLUP and Bayes  $C\pi$ . This wheat data set has been studied extensively,  
301 e.g., by Crossa et al. (2010), Gianola et al. (2011), Long et al. (2011) and Gianola et al.  
302 (2016). There are  $n = 599$  wheat inbred lines, each genotyped with  $p = 1279$  DArT (Diversity  
303 Array Technology) markers and each planted in four environments. The DArT markers are  
304 binary  $(0, 1)$  and denote presence or absence of an allele at a marker locus in a given line. Grain  
305 yields in environments 1 and 2 were employed to compare outcomes between analyses based on  
306 bivariate GBLUP and the bivariate BL. In the bivariate model, yields in the two environments  
307 are treated as distinct traits, conceptually, an idea that dates back to Falconer (1952). This type  
308 of setting arises in dairy cattle-breeding, where milk production of daughters of bulls in different  
309 countries are regarded as different traits and in multi-environment situations in plant breeding;  
310 both instances can be represented as special cases of a multiple-trait mixed effects model.

311 A publicly available Loblolly pine (*Pinus taeda*) data described in Cheng et al. (2018a)  
312 was used to carry out a predictive comparison between a Bayesian bivariate GBLUP with the  
313 bivariate Bayesian LASSO, as well as the latter versus a single-trait Bayesian LASSO. After  
314 edits, there were  $n = 807$  individuals with  $p = 4828$  SNP markers with measurements on rust  
315 bin scores and rust gall volume, two disease traits; see Cheng et al. (2018a).

## 316 6 Bivariate analysis of wheat yield: MBL versus GBLUP

### 317 6.1 Genomic BLUP and Bayesian BLUP

318 The bivariate model was

$$319 \begin{bmatrix} \mathbf{y}_1 \\ \mathbf{y}_2 \end{bmatrix} = \begin{bmatrix} \mathbf{1}\mu_1 \\ \mathbf{1}\mu_2 \end{bmatrix} + \begin{bmatrix} \mathbf{g}_1 \\ \mathbf{g}_2 \end{bmatrix} + \begin{bmatrix} \mathbf{e}_1 \\ \mathbf{e}_2 \end{bmatrix}, \quad (30)$$

320 where  $\mathbf{y}_1$  ( $\mathbf{y}_2$ ) is the vector of grain yields in environment 1 (2) of the 599 inbred lines;  $\mu_1$  and  $\mu_2$   
 321 are the trait means in the two environments and  $\mathbf{1}$  is a  $599 \times 1$  incidence vector of ones;  $\mathbf{g}_1$  and  
 322  $\mathbf{g}_2$  are the "additive genomic values" of the lines and  $\mathbf{e}_1$  and  $\mathbf{e}_2$  are model residuals. In GBLUP  
 323 (Van Raden 2008) the genetic signals captured by markers are represented as  $\mathbf{g}_1 = \mathbf{X}\boldsymbol{\beta}_1$  and  
 324  $\mathbf{g}_2 = \mathbf{X}\boldsymbol{\beta}_2$  where  $\mathbf{X}$  is a  $599 \times 1279$  centered and scaled matrix of genotype codes, and  $\boldsymbol{\beta}_1$  ( $\boldsymbol{\beta}_2$ )  
 325 contains the marker allele substitution effects on trait 1 (2). The residual distribution was

$$326 \begin{bmatrix} \mathbf{e}_1 \\ \mathbf{e}_2 \end{bmatrix} \sim N(\mathbf{0}, \mathbf{R}_0 \otimes \mathbf{I}), \quad (31)$$

327 where, as-before,  $\mathbf{R}_0$  is the  $2 \times 2$  between-trait residual variance-covariance matrix. Effects of  
 328 environment 1 are expected to be uncorrelated with those of environment 2. However, allowance  
 329 was made for a non-null residual covariance because the additive genomic model may not capture  
 330 extant epistasis involving additive effects, potentially creating correlations among residuals of  
 331 the same lines in different environmental conditions.

332 GBLUP assumed  $\boldsymbol{\beta}_1 \sim N(\mathbf{0}, \mathbf{I}\sigma_{\beta_1}^2)$ ,  $\boldsymbol{\beta}_2 \sim N(\mathbf{0}, \mathbf{I}\sigma_{\beta_2}^2)$  and  $Cov(\boldsymbol{\beta}_1, \boldsymbol{\beta}_2) = \mathbf{I}\sigma_{\beta_1\beta_2}$ , so

$$333 \mathbf{B} = \begin{bmatrix} \sigma_{\beta_1}^2 & \sigma_{\beta_1\beta_2} \\ \sigma_{\beta_1\beta_2} & \sigma_{\beta_2}^2 \end{bmatrix} \quad (32)$$

334 is the variance-covariance matrix of marker effects. It follows that

$$335 \begin{bmatrix} \mathbf{g}_1 \\ \mathbf{g}_2 \end{bmatrix} \sim N\left(\begin{bmatrix} \mathbf{0} \\ \mathbf{0} \end{bmatrix}, \mathbf{G}_0 \otimes \mathbf{G}\right), \quad (33)$$

336 where

$$337 \mathbf{G}_0 = p\mathbf{B} = \begin{bmatrix} \sigma_{g_1}^2 & \sigma_{g_{12}} \\ \sigma_{g_{12}} & \sigma_{g_2}^2 \end{bmatrix}, \quad (34)$$

338 is a between-trait variance-covariance matrix of the additive genomic values (here, e.g.,  $\sigma_{g_1}^2 =$   
 339  $p\sigma_{\beta_1}^2$ ) and  $\mathbf{G} = \mathbf{X}\mathbf{X}'/p$  is a genomic-relationship matrix describing genome-based similarities

340 among the 599 lines. The preceding assumptions induce the marginal distribution

$$341 \quad \begin{bmatrix} \mathbf{y}_1 \\ \mathbf{y}_2 \end{bmatrix} \sim \mathbf{N} \left( \begin{bmatrix} \mathbf{1}\mu_1 \\ \mathbf{1}\mu_2 \end{bmatrix}, \mathbf{V} = \mathbf{G}_0 \otimes \mathbf{G} + \mathbf{R}_0 \otimes \mathbf{I} \right), \quad (35)$$

342 where  $\mathbf{V}$  is the phenotypic covariance-matrix. The bivariate best linear unbiased predictor of  $\mathbf{g}_1$   
343 and  $\mathbf{g}_2$  (Henderson 1975)

$$344 \quad \begin{bmatrix} \hat{\mathbf{g}}_1 \\ \hat{\mathbf{g}}_2 \end{bmatrix} = (\mathbf{G}_0 \otimes \mathbf{G}) \mathbf{V}^{-1} \left( \begin{bmatrix} \mathbf{y}_1 - \mathbf{1}\hat{\mu}_1 \\ \mathbf{y}_2 - \mathbf{1}\hat{\mu}_2 \end{bmatrix} \right), \quad (36)$$

345 where

$$346 \quad \begin{bmatrix} \hat{\mu}_1 \\ \hat{\mu}_2 \end{bmatrix} = \left( \begin{bmatrix} \mathbf{1}' & \mathbf{0} \\ \mathbf{0} & \mathbf{1}' \end{bmatrix} \mathbf{V}^{-1} \begin{bmatrix} \mathbf{1} & \mathbf{0} \\ \mathbf{0} & \mathbf{1} \end{bmatrix} \right)^{-1} \left( \begin{bmatrix} \mathbf{1}' & \mathbf{0} \\ \mathbf{0} & \mathbf{1}' \end{bmatrix} \mathbf{V}^{-1} \begin{bmatrix} \mathbf{y}_1 \\ \mathbf{y}_2 \end{bmatrix} \right), \quad (37)$$

347 is the bivariate generalized least-squares (GLS) estimator of the trait means.

348 BLUP and GLS require knowledge of  $\mathbf{G}_0$  and  $\mathbf{R}_0$  and we replaced these unknown matrices  
349 by estimates obtained using a crude but simple procedure. Genomic and residual variance  
350 components were obtained by univariate maximum likelihood analyses of traits 1, 2 and  
351 1 + 2, and covariance component estimates were calculated from the expression  $Cov(X, Y) =$   
352  $[Var(X + Y) - Var(X) - Var(Y)] / 2$ . The resulting estimates of  $\mathbf{G}_0$  and  $\mathbf{R}_0$  were inside of their  
353 corresponding parameter spaces. An estimate of  $\mathbf{B}$  was obtained by applying relationship (34)  
354 to the estimated  $\mathbf{G}_0$ .

Henderson (1977) showed how BLUP of vectors that are not likelihood identified can be  
obtained from best linear unbiased predictions of likelihood-identified random effects (see Gianola  
2013). Goddard (2009) and Strandén and Garrick (2009) used this property to obtain predictions  
of marker effects ( $\beta$ ) given predictions of signal ( $\mathbf{g}$ ). If  $\beta$  and  $\mathbf{g}$  have a joint normal distribution,  
under (30) one has

$$E \left( \begin{bmatrix} \beta_1 \\ \beta_2 \end{bmatrix} \middle| \begin{bmatrix} \mathbf{g}_1 \\ \mathbf{g}_2 \end{bmatrix} \right) = (\mathbf{B}\mathbf{G}_0^{-1} \otimes \mathbf{X}'\mathbf{G}^{-1}) \begin{bmatrix} \mathbf{g}_1 \\ \mathbf{g}_2 \end{bmatrix}.$$

355 Using iterated expectations and recalling that BLUP can be viewed as an estimated conditional  
356 expectation (with fixed effects replaced by their GLS estimates), BLUP of marker effects is  
357 expressible as

$$358 \quad \begin{bmatrix} \hat{\beta}_1 \\ \hat{\beta}_2 \end{bmatrix} = \hat{E} \left( \begin{bmatrix} \hat{\beta}_1 \\ \hat{\beta}_2 \end{bmatrix} \middle| \begin{bmatrix} \mathbf{y}_1 \\ \mathbf{y}_2 \end{bmatrix} \right) = (\mathbf{B}\mathbf{G}_0^{-1} \otimes \mathbf{X}'\mathbf{G}^{-1}) \begin{bmatrix} \hat{\mathbf{g}}_1 \\ \hat{\mathbf{g}}_2 \end{bmatrix} \\ 359 \quad = (\mathbf{B}\mathbf{G}_0^{-1} \otimes \mathbf{X}'\mathbf{G}^{-1}) \mathbf{V}^{-1} \left( \begin{bmatrix} \mathbf{y}_1 - \mathbf{1}\hat{\mu}_1 \\ \mathbf{y}_2 - \mathbf{1}\hat{\mu}_2 \end{bmatrix} \right), \quad (38)$$

360 with  $\widehat{\beta}_i = \widehat{E}(\beta_i | \mathbf{y}_1, \mathbf{y}_2)$ ,  $i = 1, 2$ . After lengthy algebra and using Henderson (1975), the predic-  
 361 tion error variance-covariance matrix of the BLUP of marker effects is given by

$$\begin{aligned}
 362 \quad & \text{Var} \left( \begin{bmatrix} \widehat{\beta}_1 - \beta_1 \\ \widehat{\beta}_2 - \beta_2 \end{bmatrix} \right) \\
 363 \quad & = (\mathbf{B} \otimes \mathbf{I}_p) - (\mathbf{B} \otimes \mathbf{X}') \left[ \mathbf{I}_{2n} + \mathbf{V}^{-1} - \frac{\mathbf{V}^{-1} \mathbf{1} \mathbf{1}' \mathbf{V}^{-1}}{\mathbf{1}' \mathbf{V}^{-1} \mathbf{1}} \right] (\mathbf{B} \otimes \mathbf{X}')'. \quad (39)
 \end{aligned}$$

364 A set of  $t$  - *statistics* can be formed by taking the ratio between the BLUP of a given marker  
 365 effect as in (38) and the square root of the corresponding diagonal element of (39). The statistic  
 366 is a crude criterion for association between marker and phenotype as it ignores uncertainty  
 367 associated with the fact that  $\mathbf{B}$  and  $\mathbf{R}_0$  are estimated from the data, as opposed to being "true  
 368 values" required by BLUP theory.

369 The Bayesian bivariate GBLUP model used standard assumption as in Sorensen and Gianola  
 370 (2002), i.e., it was a multivariate normal-inverse Wishart hierarchical specification. The only  
 371 difference with GBLUP is that, in the Bayesian treatment,  $\mathbf{G}_0$  and  $\mathbf{R}_0$  were treated as unknown  
 372 parameters, with the uncertainty about their values accounted for.

## 373 6.2 Bivariate LASSO

374 Our MCMC implementation for MBL was applied to markers directly, as opposed to inferring  
 375 their effects from signal indirectly, as it is done for GBLUP. The model was as in (4) with  $T = 2$ .  
 376 Each marker was assigned a conditional bivariate Laplace prior distribution with scale matrix  
 377  $\Sigma$ ; in turn,  $\Sigma$  was given a two-dimensional inverse Wishart distribution on  $\nu_\beta = 4$  degrees of  
 378 freedom and with scale matrix  $\Omega_\beta = \nu_\beta \mathbf{B} / 12 = \mathbf{B} / 3$ . The residual variance-covariance matrix  
 379  $\mathbf{R}_0$  was assigned the two-dimensional Jeffreys improper prior in (6).

380 The MCMC scheme employed the scale mixture of normals representation of the bivariate  
 381 Laplace distribution. First, six independent chains of 1500 iterations each were run. The shrink-  
 382 age diagnostic metric of Gelman and Rubin (1992) was calculated for  $\mu_1$ ,  $\mu_2$ ,  $\mathbf{R}_0$  and  $\Sigma$ , for  
 383 the effect of marker 10 on trait 1, and for the effect of marker 200 on trait 2; the R package  
 384 CODA was used for this purpose. Supplementary Figures 4-13 gave no strong evidence of lack  
 385 of convergence, as indicated by shrinkage factor values close to 1.

386 Post-burn in samples were collected for an additional 2000 iterations in each chain, so a total  
 387 of 12,000 samples (without thinning) was used for inference. Supplementary Figures 14 and  
 388 15 depict post burn-in trace plots for the elements of  $\mathbf{R}_0$  and  $\Sigma$ , respectively. The six chains  
 389 "joined" eventually and sample values thereafter fluctuated within what seemed to be stationary  
 390 distributions. To assess convergence further, a test suggested by Geweke (1992) was applied to  
 391 the combined 12000 samples from the posterior distributions of  $\mu_1, r_{e12}$  (residual correlation

392 between yields in environments 1 and 2) and  $r_{\beta_{12}}$ , the correlation between effects of a marker  
393 on the two traits. The test compared means of two parts of the combined collection of 12,000  
394 samples at each of 10 segments of the collection: there was no evidence of lack of convergence.  
395 In short, the implementation met successfully the convergence tests applied.

396 Figures 1 and 2 display estimated posterior densities of  $r_{e_{12}}$  and  $r_{\beta_{12}}$ . Mixing for  $r_{\beta_{12}}$  was  
397 poorer than for  $r_{e_{12}}$ ; the effective number of samples was 220.6 and 979.0, respectively, and Monte  
398 Carlo errors were small enough. The residual correlation (posterior mean, 0.17) was positive and  
399 different from 0, whereas the  $r_{\beta_{12}}$  parameter was estimated at -0.35, also different from zero.  
400 However, the posterior densities were not sharp enough for precise inference, probably due to  
401 the small sample size ( $n = 599$ ) and low density of the marker panel ( $p = 1279$ ). The quality of  
402 these estimates is of subsidiary interest here as our objective was to demonstrate the MBL in a  
403 comparison with bivariate BLUP of marker effects.

404 Location parameters mixed well. For example, the average effective sample size of  $\mu_1$  over  
405 the 6 chains during burn in was 1499 for a nominal 1500 iterations. For marker 10 effect on  
406 trait 1 it was 962 out of 1500, and for marker 200 effect on trait 2 effective size was 1130 out  
407 of 1500. These numbers suggest that all 2558 marker effects were estimated with a very small  
408 Monte Carlo error in our MBL implementation with 12,000 samples used for inference.

### 409 **6.3 MBL vs BLUP estimates of marker effects**

410 Figure 3 gives a comparison between bivariate BLUP and posterior mean estimates of effects  
411 from MBL. The upper panel shows good alignment between estimates, except at the extremes  
412 of the scatter plots. The lower panel depicts that markers with the strongest absolute effects, as  
413 estimated by BLUP, had an even stronger effect when estimated under the bivariate BL. Figure  
414 4 presents standardized estimates of each of the 1279 marker effects, by trait. For GBLUP the  
415  $t$  - statistic was the estimated marker effect divided by the square root of its prediction error  
416 variance; for MBL it was the posterior mean divided by its posterior standard deviation. There  
417 is no evidence that any of the markers had an effect differing from 0, corroborating the view that  
418 wheat yield is a typical quantitative trait affected by many variants each having a small effects  
419 (Singh et al. 1986; Sleper and Poehlman 2006). Using a univariate least-squares, GWAS-type  
420 analysis, there were 29 (yield 1) and 56 (yield 2) significant hits after a Bonferroni correction  
421 (1279 tests,  $\alpha = 0.05$ ). A comparison between the  $t$  - statistics from the GWAS-type analysis  
422 with the standardized BLUP and MBL effects is provided in Figure 5. As expected, shrinkage  
423 towards null-mean distributions (bivariate Gaussian in BLUP and bivariate Laplace in MBL)  
424 made  $t$  - statistics much smaller in absolute value than the corresponding ones from GWAS.

425 Standard GWAS aims to find connections between markers and genomic regions having an  
426 effect on a single trait (e.g., Manolio et al. 2009, Visscher et al. 2012; Gianola et al. 2016; Schaid  
427 et al. 2018) A search for pleiotropy, on the other hand, focuses on markers having multi-trait



428 effects. The latter can be viewed as a search for vectors of effects with non-null coordinates that  
429 are distant from a  $T$ -dimensional 0 origin. Mahalanobis squared distances ( $m_j^2$ ) away from  $(0, 0)$   
430 for each the 1279 bivariate vectors of marker effects were calculated for both BLUP and MBL. For  
431 BLUP and marker  $j$ , the squared distance was computed as  $m_{Blup,j}^2 = \beta'_{Blup,j} \mathbf{B}^{-1} \beta_{Blup,j}$ , and for  
432 MBL it was  $m_{MBL,j}^2 = \beta'_{MBL,j} (12\bar{\Sigma})^{-1} \beta_{MBL,j}$  where  $\beta_{.,j}$  are effect estimates for marker  $j$  and  
433  $\bar{\Sigma}$  is the estimated posterior expectation of  $\Sigma$ . For BLUP,  $m_{Blup,j}^2$  had median and maximum  
434 values of 0.16 and 2.94, respectively, over markers. For MBL the corresponding values were  
435 0.14 and 3.83. Figure 6 shows that the largest estimated distances were obtained with MBL,  
436 supporting the view that the method produces less shrinkage of multiple-trait effect sizes than  
437 BLUP. If the 95% percentile of a chi-squared distribution on 2 degrees of freedom (5.99 and 14.4  
438 without and with a Bonferroni correction at  $\alpha = 0.05$ ) is used as "significance threshold", none  
439 of the 1279 markers could be claimed to have a bivariate effect on the trait, which is consistent  
440 with the  $t$ -statistics.

## 441 7 Predictive comparison between MBL, MTGBLUP and 442 MT-BayesC $\pi$ : wheat

443 Bivariate Bayesian GBLUP and BayesC $\pi$  models (Cheng et al. 2018a) were also fitted to the  
444 wheat data set. Multiple-trait Bayesian linear models are well known (e.g., Sorensen and Gianola  
445 2002); BayesC $\pi$  consisted of a bivariate mixture in which each of the 1279 markers was allowed  
446 to fall, *a priori*, into one of four disjoint classes:  $(0, 0)$ ,  $(0, 1)$ ,  $(1, 0)$ ,  $(1, 1)$ , where  $(0, 0)$  means  
447 that a marker has no effect on either trait,  $(0, 1)$  indicates that a marker affects yield 2 only, and  
448 so on. The prior for the four probabilities of membership was a *Dirichlet*  $(1, 1, 1, 1)$  distribution.  
449 All three methods were run in each of 100 randomly constructed training sets and predictions  
450 were formed for lines in corresponding testing sets. Training and testing set sizes had 300 and  
451 299 wheat lines, respectively, in each of the 100 runs. For all methods, the MCMC scheme was  
452 a single long chain of 50,000 iterations, with a burn-in period of 1,000 draws. The analyses were  
453 run using the JWAS package written in the JULIA language (Cheng et al. 2018b).

454 Figures 7 and 8 present pairwise plots (bivariate Bayesian GBLUP denoted as RR-BLUP  
455 in the plots) of predictive correlations and predictive mean-squared errors, respectively; the  
456 plots display less than 100  $(X, Y)$  points because numbers were rounded to two decimal points.  
457 There were no appreciable differences in predictive performance between the three methods,  
458 supporting the view that cereal grain yield is multi-factorial and that there are none, if any,  
459 genomic regions, with large effects. The variability among replications of the training-testing  
460 layout is essentially random, reinforcing the notion of the importance of measuring uncertainty  
461 of prediction (Gianola et al. 2018). Many studies fail to replicate and often claim differences

462 between methods based on single realizations of predictive analyses.

## 463 **8 Predictive comparison between MBL vs MTGBLUP** 464 **and MBL vs single trait Bayesian LASSO: *Pinus***

465 Figures 9 and 10 present scatter-plots of the predictive performance (mean squared error and  
466 correlation, respectively) of the bivariate Bayesian LASSO and bivariate Bayesian GBLUP (MT-  
467 GBLUP, denoted as RR-BLUP in the plots) in the 100 testing sets. There were no obvious  
468 differences in mean-squared error for either rust bin or gall volume although, for the latter trait,  
469 a slight superiority of MBL was noted (Figure 9); the plot contains distinct 12 points because  
470 the overlap in numerical values produced "clusters" of points. On the other hand, there was a  
471 decisive superiority (Figure 10) of MBL over MTGBLUP in predictive correlation.

472 Figure 11 contrasts the predictive performance of the bivariate Bayesian LASSO over the  
473 single trait Bayesian LASSO for gall volume. The two trait analysis tended to produce larger  
474 predictive correlations and smaller mean-squared errors, illustrating an instances in which a  
475 multiple-trait specification clearly constitutes a better prediction machine.

## 476 **9 Conclusion**

477 Our study is possibly the first report in the quantitative genetics literature of a multiple-trait  
478 Bayesian LASSO (MBL), inspired by the BL of Park and Casella (2008). MBL assumes that  
479 vectors of marker effects on  $T$  traits follow a null-mean multivariate Laplace distribution, *a*  
480 *priori*. This distribution has a sharp peak at the origin and reduces to the double exponential  
481 prior of the BL when applied to a single trait. The implementation of MBL requires Markov  
482 chain Monte Carlo sampling and a relative simple Metropolis-Hastings algorithm based on a  
483 scaled mixture of normals representation (Gómez-Sánchez-Manzano et al. 2008) was presented.  
484 The algorithm was tested thoroughly with a wheat data set and found to mix well, with no  
485 evidence of lack of convergence to the posterior distribution and with a small Monte Carlo error.

486 A question that arises often in practice, is the extent to which a multiple-trait method  
487 will produce a better performance than a single-trait specification. If the parameters of the  
488 model (assuming it holds) representing the inter-trait distribution are either known or well  
489 estimated, one should expect more power for QTL detection and a better predictive performance  
490 for the multivariate specification. In our study we found that MBL outperformed the single  
491 trait in terms of delivering a better predictive performance for gall volume but not for rust  
492 bin in *Pinus*. On the other hand, a multiple-trait analysis is more complex and requires more  
493 assumptions, so it may be less robust than a single trait procedure and fail to deliver according

494 to expectation in real-life circumstances. It is risky to make sweeping statements arguing in favor  
495 of a specific treatment of data as outcomes are heavily dependent on the biological architecture  
496 of the traits considered, and on the data structure as well. The picture emerging from two  
497 decades of experience in genome-enabled prediction in the fields of animal and plant breeding  
498 is that is largely futile to categorize methods in terms of expected predictive performance using  
499 broad criteria, in view of the large variability of performance with respect to data structure for  
500 any given prediction machine (Morota and Gianola 2014; Gianola and Rosa 2015; Momen et al.  
501 2018; Montesinos-López et al. 2019 a,b,c,d; Azodi et al. 2019).

502 MBL is expected to shrink more strongly towards zero vectors of markers with small effects  
503 in their coordinates, thus producing differential shrinkage and preserving the *modus operandi* of  
504 BL. Mimicking the single-trait argument in Tibshirani (1996) which shows equivalence between  
505 LASSO and a posterior mode, the representation in Appendix E illustrates that the degree of  
506 shrinkage of the vectorial effects of a marker ( $j$ , say) on a set of traits is inversely proportional to  
507 the quadratic form  $\beta_j' \Sigma^{-1} \beta_j$ . Thus, multivariate Bayesian pseudo-sparsity is induced by MBL  
508 to an extent depending on the heterogeneity of  $\beta_j' \Sigma^{-1} \beta_j$  over markers. We note, in passing, that  
509 the term  $\sum_{j=1}^p \sqrt{\beta_j' \Sigma^{-1} \beta_j}$  given in (66) of Appendix E is the counterpart of  $\sum_{g=1}^G \sqrt{\sum_{t=1}^T \beta_{gt}^2}$ , part of  
510 the "group-penalty" in Li et al. (2015), where  $g$  is some meaningful group of markers arrived at,  
511 say, on the basis of biological considerations, and  $\beta_{gt}^2$  is the group regression coefficient for trait  
512  $t$ . The latter penalty assigns the same weight to these regressions over traits, contrary to MBL  
513 where weights and co-weights are driven by  $\Sigma^{-1}$ . The BL or MBL can be adapted to situations  
514 where a group structure may be needed via hierarchical modeling; this fairly straightforward issue  
515 is outside of the scope of the paper but may pursued in future extensions of MBL. Actually,  
516 Liquet et al. (2017) described a Bayesian multiple-trait analysis where a LASSO-type penalty  
517 is assigned to group effects and a spike-slab prior induces additional Bayesian sparsity at the  
518 level of individual regression coefficients. The authors did not address the predictive ability  
519 of their method so it would be interesting to compare it against MBL and the multiple-trait  
520 mixture model of Cheng et al. (2018). We plan to carry out this comparison in collaboration  
521 with CIMMYT (Centro Internacional de Mejoramiento de Maíz y Trigo, México) using a large  
522 number of data sets in various cereal crops.

523 Knowledge of the genetic basis of complex traits is limited and not vast enough to enable  
524 formulation of *a priori* prescriptions for any specific trait or situation. The number, location  
525 and effects of causal variants, the linkage disequilibrium structure between such variants and  
526 markers, and the mode of gene action of QTL are largely unknown, this holding for all species of  
527 domesticated plants and animals and for most common diseases in humans. Theoretically, MBL  
528 is expected to perform better than multiple-trait BLUP whenever appreciable heterogeneity  
529 exists over the effects of the markers in the panel employed, while behaving as multiple-trait

530 GBLUP when all markers have tiny and similar effects. This consideration follows directly from  
531 the structure of the method, and computer simulations could be easily tailored to create scenarios  
532 where MBL has a better or a worse performance simply by design but without necessarily being  
533 relevant to a real-life inferential or predictive problem.

534 The expectation stated above was verified empirically: markers with stronger (positive or  
535 negative) effects on the wheat yields examined had larger Mahalanobis distances away from zero  
536 than markers with small effects. Further, markers with short distances in GBLUP had even  
537 shorter distances under MBL. None of the two methods was able to detect variants having a  
538 strong effect on wheat yield, contrary to least-squares GWAS. However, outcomes from GWAS  
539 are not strictly comparable with those from shrinkage-based procedures. In single-marker least-  
540 squares the estimator is potentially biased because other genomic regions are ignored in the  
541 model; further, short and long range linkage disequilibria create statistical ambiguity (Gianola  
542 et al. 2016). In WGR, on the other hand, regressions are akin to partial derivatives, i.e., the  
543 coefficient gives the net effect of the marker given that the other markers are fitted; typically,  
544 regressions become smaller as  $p$  is increased at a fixed  $n$ .

545 In plant and animal breeding, a focal point is the evaluation of genetic merit of candidates  
546 for artificial selection, and the prediction of expected performance in either collateral relatives  
547 or in descendants. Under the assumptions of additive inheritance, genome-enabled prediction  
548 (Meuwissen et al. 2001) produces estimates of marked additive genomic value,  $\mathbf{g}$ , or signal as  
549 referred to in our paper. In MBL,  $\mathbf{g}$  and marker effects can be inferred from their posterior mean  
550 or from a modal approximation (MAP-MBL) that does not involve MCMC which is described  
551 in Appendix E. A rough comparison between GBLUP, MBL and MAP-MBL was carried out  
552 with the wheat data. For the latter, we used  $\Sigma = \mathbf{G}_0/(12p)$ , and starting values for the iteration  
553 were calculated using BLUP estimates of marker effects. MAP with  $T = 2$  were iterated for 500  
554 rounds. Supplementary Figure S16 shows that, at iteration 500, the metric used for monitoring  
555 convergence had stabilized at the third decimal place, but iteration could have stopped after  
556 200 rounds, for our purposes. Supplementary Figure S17 presents a scatter plot of the 2558  
557 (bivariate) marker effect solutions at iterations 1 and 500 against the corresponding BLUP  
558 or MBL posterior mean estimates. Clearly, MAP approach gave markedly different results,  
559 producing a stronger shrinkage to 0 of small-effect markers and, thus, an effectively more sparse  
560 model. Supplementary Figure S18 gives a comparison of the fitted genomic values, i.e.,  $\mathbf{g}_1 = \mathbf{X}\beta_1^*$   
561 and  $\mathbf{g}_2 = \mathbf{X}\beta_2^*$  for the two traits. GBLUP and MBL estimates were closely aligned and fitted the  
562 data in a similar manner. On the other hand, MAP-MBL gave a larger mean-squared error of fit  
563 and a smaller correlation between fitted and observed phenotypes, possibly because of the larger  
564 effective sparsity of MAP-MBL. A worse fit to the data does not necessarily imply a poorer  
565 predictive ability. A thorough comparison of predictive ability between MBL and MAP-MBL  
566 will be carried out in future research.

567 Our predictive comparison in wheat involved three bivariate models: GBLUP, MBL and  
568 BayesC $\pi$ , which employs Bayesian model averaging. A training-testing validation replicated 100  
569 times at random indicated no differences among methods. However, it was found that MBL  
570 was better than MT Bayesian BLUP for the two pine tree traits. After almost two decades  
571 of genome-enabled prediction it is now clear that no universally best prediction machine exists  
572 (Gianola et al. 2011; Heslot 2012; de los Campos et al. 2013; Momen et al. 2018; Bellot et  
573 al. 2018; Montesinos-López et al. 2018a, b, c, d) even when non-parametric or deep learning  
574 techniques are brought into the comparisons.

575 As far as we know, our paper represents the first report in the quantitative genetics literature  
576 of a multiple-trait LASSO, implemented in a Bayesian or empirical Bayes (Appendix E) manner.  
577 MBL adds to the armamentarium of genome-enabled prediction and expands the family of mem-  
578 bers of the Bayesian alphabet (Gianola et al. 2009; Habier et al. 2011; Gianola 2013). Further,  
579 it has been implemented in the publicly available JWAS software (Cheng et al. 2018b). We take  
580 the view that every prediction problem is unique and that no claims about the superiority of a  
581 specific procedure over others should be made without qualifications. For instance, MBL could  
582 perform worse or better than here when applied to other species, traits, or when confronted  
583 with different data structures. Most quantitative and disease traits are truly complex and it is  
584 dangerous to offer simplistic solutions or predictive panaceas (Goddard et al. 2019).

## 585 **10 Acknowledgments**

586 Professor Chris-Carolin is thanked for useful discussions and comments. J. M. Marín provided  
587 technical information on the MLAP distribution. Two anonymous reviewers are thanked for  
588 helpful suggestions. Financial support to DG was provided by the Deutsche Forschungsgemein-  
589 schaft (grant No. SCHO 690/4-1 to CCS) and by the J. Lush Endowment as Visiting Professor  
590 at Iowa State University in 2018. The University of Wisconsin-Madison, USA, the Technical  
591 University of Munich (TUM) Institute for Advanced Study, TUM School of Life Sciences, the  
592 Institut Pasteur de Montevideo, Uruguay, are thanked for providing office space, library and  
593 computing resources and logistic support.

## 594 **11 Legend for Figures**

595 Figure 1. Bivariate Bayesian LASSO: trace plot and posterior density of residual correlation.

596 Figure 2. Bivariate Bayesian LASSO: trace plot and posterior density of correlation between  
597 marker effects.

598 Figure 3. Bivariate GBLUP versus bivariate Bayesian LASSO (posterior mean) estimates of  
599 marker effects on wheat grain yield.

600 Figure 4.  $t$ -statistics for marker effects on wheat grain yield: GBLUP versus bivariate  
601 Bayesian LASSO (MBL)

602 Figure 5.  $t$ -statistics for marker effects on wheat grain yield: ordinary least-squares (OLS)  
603 versus bivariate Bayesian LASSO (MBL) and bivariate GBLUP.

604 Figure 6. Mahalanobis squared distance (M) away from (0,0) for bivariate effects on grain  
605 yield of 1279 markers: GBLUP versus bivariate Bayesian LASSO (BLASSO)

606 Figure 7. Predictive correlations for wheat grain yield: bivariate Bayesian LASSO (Bayes L)  
607 versus bivariate GBLUP (RR-BLUP).

608 Figure 8. Predictive mean-squared error for grain yield: bivariate Bayesian LASSO (Bayes  
609 L), bivariate GBLUP (RR-BLUP) and bivariate Bayes  $C\pi$ .

610 Figure 9. Mean-squared error of prediction for rust bin and gall volume in pine trees: bivariate  
611 Bayesian LASSO (Bayes L) versus bivariate Bayesian GBLUP (RR-BLUP).

612 Figure 10. Predictive correlation for rust bin and gall volume in pine trees: bivariate Bayesian  
613 LASSO (Bayes L) versus bivariate Bayesian GBLUP (RR-BLUP).

614 Figure 11. Predictive mean squared error and correlation for gall volume in pine trees: bivariate  
615 Bayesian LASSO (MTBayesL) versus univariate Bayesian LASSO (STBayesL)

## 616 12 Literature Cited

617 Azodi, C., Bolger, E., McCarren, A., Roantree, M., de los Campos, G., Shiu, S-H., 2019, Bench-  
618 marking parametric and machine learning models for genomic prediction of complex traits.  
619 Genes, Genomes, Genetics 9: 3691-3702.

620 Calus, M. P. L., Veerkamp, R. F., 2011, Accuracy of multi-trait genomic selection using  
621 different methods. Genetics Selection Evolution. doi.org/10.1186/1297-9686-43-26.

622 Cheng, H., Kizilkaya, K., Zeng, J., Garrick, D., 2018a, Genomic prediction from multiple-  
623 trait Bayesian regression methods using mixture priors. Genetics 209: 89-103.

624 Cheng, H., Fernando, R., Garrick, D., 2018b, Julia implementation of whole-genome analy-  
625 ses Software. Proceedings of the World Congress on Genetics Applied to Livestock Production.  
626 <http://www.wcgalp.org/proceedings/2018/jwas-julia-implementation-whole-genome-analyses-software>

627 Crossa, J., de los Campos, G., Pérez, P., Gianola, D., Burgueño, J., et al. 2010, Prediction  
628 of genetic values of quantitative traits in plant breeding using pedigree and molecular markers.  
629 Genetics 186: 713–724.

630 de los Campos, G., Naya, H., Gianola, D., Crossa, J., Legarra, A., Manfredi, E., Weigel, K.,  
631 Cotes, J. M., 2009, Predicting quantitative traits with regression models for dense molecular  
632 markers and pedigree. Genetics 182: 375-385.

- 633 de los Campos G., Gianola, D., Allison, D. A. B., 2011, Predicting genetic predisposition in  
634 humans: the promise of whole-genome markers. *Nature Reviews Genetics* 11: 880-886.
- 635 de los Campos G., Hickey, J. M., Pong-Wong, R., Daetwyler, H. D., Calus, M. P. L., 2013,  
636 Whole-genome regression and prediction methods applied to plant and animal breeding. *Genetics*  
637 193: 327-345.
- 638 Falconer, D. S., 1952, The problem of environment and selection. *American Naturalist* 86:  
639 293-298.
- 640 Fernando, R., Toosi, A., Wolc, A., Garrick, D., Dekkers, J., 2017, Application of whole-  
641 genome prediction methods for genome-wide association studies: a Bayesian approach. *Journal*  
642 *of Agricultural, Biological and Environmental Statistics* 22: 172-193.
- 643 Galesloot, T. E., van Steen, K., Kiemeneij, L. A. L. M, Janss, L. L., Vermeulen, S. H., 2014.  
644 A comparison of multivariate genome-wide association methods. *PLoS One*.  
645 [doi.org/10.1371/journal.pone.0095923](https://doi.org/10.1371/journal.pone.0095923)
- 646 Gao, H., Madsen, P., Pösö, J., Aamand, G. P., Lidauer, M, Jensen, J., 2018. Multivariate  
647 outlier detection for routine Nordic dairy cattle genetic evaluation in the Nordic Holstein and  
648 Red population. *Journal of Dairy Science* 101: 11159-11164.
- 649 Gelfand, A. E., Dey, D. K., Chang, H., 1992, Model determination using predictive distri-  
650 butions with implementation via sampling-based methods. In *Bayesian Statistics 4*, ed. J. M.  
651 Bernardo, J. O. Berger, A. P. Dawid, and A. F. M. Smith, 147-167. Oxford University Press.
- 652 Gelman, A., Rubin, D. B., 1992, Inference from iterative simulation using multiple sequences  
653 (with discussion). *Statistical Science* 7: 457-511.
- 654 Gelman, A., Carlin, J. B., Stern, H. S., Dunson, D. B., Vehtari, A., Rubin, D. B., 2014,  
655 *Bayesian Data Analysis*. 3rd Edition. Chapman and Hall/CRC Press. Boca Raton.
- 656 Geweke, J., 1992, Evaluating the accuracy of sampling-based approaches to calculating pos-  
657 terior moments. In *Bayesian Statistics 4* (ed. Bernardo, J. M., Berger, J. O., Dawid, A. P.,  
658 Smith, A. F. M. Clarendon Press, Oxford.
- 659 Gianola, D., 2013, Priors in whole genome regression: the Bayesian alphabet returns. *Ge-*  
660 *netics* 194: 573-596.
- 661 Gianola, D., Pérez-Enciso, M., Toro, M. A., 2003, On marker-assisted prediction of genetic  
662 value: beyond the ridge. *Genetics* 63: 347-65.
- 663 Gianola, D., de los Campos, G., Hill, W. G., Manfredi, E., Fernando, R. L., 2009, Additive  
664 genetic variability and the Bayesian alphabet. *Genetics* 187: 347-63.
- 665 Gianola, D., Okut, H., Weigel, K. A., Rosa, G. J. M., 2011, Predicting complex quantitative  
666 traits with Bayesian neural networks: a case study with Jersey cows and wheat. *BMC Genetics*.  
667 [doi: 10.1186/1471-2156-12-87](https://doi.org/10.1186/1471-2156-12-87).
- 668 Gianola, D., de los Campos, G., Toro, M. A., Naya, H., Schön, C-C, Sorensen, D., 2015, Do  
669 molecular markers inform about pleiotropy? *Genetics* 201: 23-99.

- 670 Gianola, D., Rosa, G. J. M., 2015, One hundred years of statistical developments in animal  
671 breeding. *Annual Reviews of Animal Biosciences* 3:19-56.
- 672 Gianola, D., Fariello, M. I., Naya, H., Schön, C-C, 2016, Genome-wide association studies  
673 with a genomic relationship matrix: a case study with wheat and *Arabidopsis*. *G3: Genes,*  
674 *Genomes. Genetics* doi: 10.1534/g3.116.034256.
- 675 Gianola, D., Cecchinato, A., Naya, H., Schön, C-C, 2018, Prediction of complex traits: robust  
676 alternatives to best linear unbiased prediction. *Frontiers in Genetics* doi.org/10.3389/fgene.2018.00195.
- 677 Goddard, M. E., 2009, Genomic selection: prediction of accuracy and maximisation of long  
678 term response. *Genetica* 136: 2452-57.
- 679 Goddard, M. E., Kemper, K. E., MacLeod, I. M., Chamberlain, A. J., Hayes, B. J., 2016,  
680 Genetics of complex traits: prediction of phenotype, identification of causal polymorphisms and  
681 genetic architecture. *Proceedings of the Royal Society B.* doi.org/10.1098/rspb.2016.0569.
- 682 Goddard M. E., Meuwissen, T. H. E., Daetwyler, H. D., 2019, Prediction of phenotype from  
683 DNA variants. In *Handbook of Statistical Genomics*, Eds. Balding, D., Moltke, I., Marioni, J.  
684 Wiley, Hoboken, USA and Chichester, UK.
- 685 Gómez, E., Gómez-Villegas, M. A., Marín, J. M., 2007, A multivariate generalization of the  
686 power exponential family of distributions. *Communications in Statistics - Theory and Methods*  
687 27: 589-600.
- 688 Gómez-Sánchez-Manzano, E., Gómez-Villegas, M. A., Gómez, E., Marín, J. M., 2008, Mul-  
689 tivariate exponential power distributions as mixtures of normal distributions with Bayesian ap-  
690 plications. *Communications in Statistics - Theory and Methods* 37: 972-985.
- 691 Habier, D., Fernando, R. L., Kizilkaya, K., Garrick, D. J., 2011, Extension of the Bayesian  
692 alphabet for genomic selection. *BMC Bioinformatics.* doi.org/10.1186/1471-2105-12-18.
- 693 Hazel, L. N., 1943, The genetic basis for constructing selection indexes. *Genetics* 28: 476-490.
- 694 Henderson, C. R., 1975, Best linear unbiased estimation and prediction under a selection  
695 model. *Biometrics* 31: 423-449.
- 696 Henderson, C. R., 1977, Best linear unbiased prediction of breeding values not in the model  
697 for records. *Journal of Dairy Science* 60: 783-787.
- 698 Henderson, C. R., Quaas, R. L., 1976 Multiple trait evaluation using relatives' records.  
699 *Journal of Animal Science* 43: 1188-1197.
- 700 Heslot, N., Yang, H. P., Sorrells, M. E., Jannink, J. L., 2012, Genomic selection in plant  
701 breeding: a comparison of models. *Crop Science* 52: 146-160.
- 702 Isik, F., Holland, J., Maltecca, C., 2017, *Genetic Data Analysis for Plant and Animal Breed-*  
703 *ing.* Springer, Cham.
- 704 Jia, Y., Jannink, J. L., 2012, Multiple-trait genomic selection methods increase genetic value  
705 prediction accuracy. *Genetics* 192: 1513-1522.
- 706 Lande, R., Thompson, R., 1990, Efficiency of marker-assisted selection in the improvement



707 of quantitative traits. *Genetics* 124: 743-756.

708 Lee, S. H., Wray, N. R., Goddard, M. E., Visscher, P. M., 2011, Estimating missing heri-  
709 tability for disease from genome-wide association studies. *American Journal of Human Genetics*  
710 88: 294-305.

711 Legarra, A., Robert-Granié, C., Croiseau, P., Guillaume, F., Fritz, S., 2011, Improved LASSO  
712 for genomic selection. *Genetics Research* 93: 77-87.

713 Lehermeier C., Wimmer, V., Albrecht, T., Auinger, H., Gianola, D., Schön, C-C, Schmid,  
714 V. J., 2013, Sensitivity to prior specification in Bayesian genome-based prediction models. *Sta-  
715 tistical Applications in Genetics and Molecular Biology* 12: 1-17.

716 Li, J., Das, K., Fu, G., Li, R., Wu, R., 2011, The Bayesian LASSO for genome-wide associ-  
717 ation studies. *Bioinformatics* 27: 516-523.

718 Li, Z., Möttonen, J., Sillanpää, M. J., 2015, A robust multiple-trait locus method for quan-  
719 titative trait locus analysis of non-normally distributed multiple traits. *Heredity* 115: 556-564.

720 Liquet, B., Mengersen, K. Pettitt, A. N., Sutton, M., 2017, Bayesian variable selection  
721 regression of multivariate responses for group data. *Bayesian Analysis* 12: 1039-1067.

722 Long, N., Gianola. D., Rosa, G. J. M., Weigel, K. A., 2011, Marker-assisted prediction of  
723 non-additive genetic values. *Genetica* 139: 843-854.

724 López de Maturana, E., Chanok, S. J., Picornell, A. C., Rothman, N., Herranz, J., Calle,  
725 M. L., Garcia-Closas, M., Marenne, G., Brand, A., Tardon, A., Carrato, A., Silverman, D. T.,  
726 Kogevinas, M., Gianola, D., Real, F.X., Malats, N., 2014, Whole genome prediction of bladder  
727 cancer risk with the Bayesian LASSO. *Genetic Epidemiology*. DOI 10.1002/gepi.21809.

728 Makowsky R., Pajewski, N. M., Klimentidis, Y. C., Vázquez, A. I., Duarte, C. W., Allison,  
729 D. A. B., de los Campos, G., 2011, Beyond missing heritability: prediction of complex traits.  
730 *PLoS Genetics* doi:10.1371/journal.pgen.1002051.

731 Manolio, T.A., Collins, F. S., Cox, N. J., Goldstein, D. B., Hindorff, L. A., et al., 2009,  
732 Finding the missing heritability of complex diseases. *Nature* 461: 747-753.

733 Meuwissen, T. H. E., Hayes, B. J., Goddard, M. E., 2001 Prediction of total genetic value  
734 using genome-wide dense marker maps. *Genetics* 157: 1819-1829.

735 Momen, M., Ayatollahi-Mehrgardi, A., Sheikhi, A., Kranis, A., Tusell, L., Morota, G., Rosa,  
736 G. J. M., Gianola, D., 2018, Predictive ability of genome-assisted statistical models under various  
737 forms of gene action. *Scientific reports* 8: 1-11.

738 Montesinos-López, O. A., Martín-Vallejo, J., Crossa, J., Gianola, D., Hernández-Suárez, C.  
739 M., et al., 2019a, New deep learning genomic-based prediction model for multiple traits with  
740 binary, ordinal, and continuous phenotypes. *G3: Genes, Genomes, Genetics* 9: 1545-1556.

741 Montesinos-López, O. A., Martín-Vallejo, J., Crossa, J., Gianola, D., Hernández-Suárez, C.  
742 M., et al., 2019b, A benchmarking between deep learning, support vector machine and Bayesian  
743 threshold best linear unbiased prediction for predicting ordinal traits in plant breeding. *G3:*

744 Genes, Genomes, Genetics 9: 601-618.

745 Montesinos-López, A., Montesinos-López, O. A., Gianola, D., Crossa, J., Hernández-Suárez,  
746 C. M., 2019c, Multi-environment genomic prediction of plant traits using deep learners with  
747 dense architecture. *G3: Genes, Genomes, Genetics* 8: 3813-3828.

748 Montesinos-López, O. A., Martín-Vallejo, J., Crossa, J., Gianola, D., Hernández-Suárez,  
749 2019d, Multi-trait, multi-environment deep learning modeling for genomic-enabled prediction of  
750 plant traits. *G3: Genes, Genomes, Genetics* 8: 3829-3840.

751 Moser, G., Lee, S. H., Hayes, B. J., Goddard, M. E., Wray, N. M., Visscher, P. M., 2015,  
752 Simultaneous discovery, estimation and prediction analysis of complex traits using a Bayesian  
753 mixture mode. *PLoS Genetics*. doi.org/10.1371/journal.pgen.1004969.

754 Park, T., Casella G., 2008, The Bayesian LASSO. *Journal of the American Statistical Asso-*  
755 *ciation* 103: 681-686.

756 Pérez, P., de los Campos, G., 2014, Genome-wide regression and prediction with the BGLR  
757 statistical package. *Genetics* 198: 483-495.

758 Samorodnitsky, G., Taqqu, M. S., 2000. *Stable non-Gaussian random processes*. Chapman-  
759 Hall/CRC Boca Raton.

760 Schaid, D. J., Wenan, C., Larson, N. B., 2018, From genome-wide associations to candidate  
761 causal variants by statistical fine-mapping. *Nature Reviews Genetics* 19: 491–504.

762 Singh G., Bhullar, G. S., Gill, K. S., 1986, Genetic control of grain yield and its related traits  
763 in bread wheat. *Theoretical & Applied Genetics* 72: 536-40.

764 Sleper, D. A., Poehlman M. (2006) *Breeding Field Crops*. 5th Edition. Wiley-Blackwell.

765 Smith, H. F., 1936, A discriminant function for plant selection. *Annals of Eugenics*. 7:  
766 240–250.

767 Sorensen, D., Gianola, D., 2002, *Likelihood, Bayesian, and MCMC methods in quantitative*  
768 *genetics*. Springer, New York.

769 Strandén, I., Garrick, D. J., 2009, Derivation of equivalent computing algorithms for genomic  
770 predictions and reliabilities of animal merit. *Journal of Dairy Science* 92: 2971-2975.

771 Tibshirani, R. 1996, Regression shrinkage and selection via the LASSO. *Journal of the Royal*  
772 *Statistical Society B* 58: 267-288.

773 Van Raden P. M., 2007, Genomic measures of relationship and inbreeding. *Interbull Bulletin*  
774 *37: 33–36*.

775 Van Raden P. M., 2008, Efficient methods to compute genomic predictions. *Journal of Dairy*  
776 *Science* 91: 4414–4423.

777 Van Tassell, C. P., Van Vleck, L. D., 1996, Multiple-trait Gibbs sampler for animal models:  
778 flexible programs for Bayesian and likelihood-based (co)variance component inference. *Journal*  
779 *of Animal Science* 74: 2586-2597.

780 Visscher, P. M., Brown, M. A., McCarthy, M. I., Yang, J., 2012, Five years of GWAS

781 discovery. *American Journal of Human Genetics* 13: 7-24.

782 Visscher, P. M., Wray, N. R., Zhang, Q., et al., 2017, 10 Years of GWAS Discovery: Biology,  
783 Function, and Translation. *American Journal of Human Genetics* 101: 5-22.

784 Walsh, B., Lynch, M., 2018, *Evolution and selection of quantitative traits*. Oxford University  
785 Press, New York.

786 Yang J., Benyamin, B., McEvoy, B. P., Gordon, S., Henders, A.K., Nyholt, D.R., Madden,  
787 P. A., Heath, A. C., Martin, N. G., Montgomery, G. W., Goddard, M. E., Visscher, P. M., 2010,  
788 Common SNP's explain a large proportion of the heritability for human height. *Nature Genetics*  
789 42: 565–569.

790 Yi, N., Xu, S., 2008, Bayesian LASSO for quantitative trait loci mapping. *Genetics* 179:  
791 1045-1055.

792 Yuan, M., Lin, Y., 2006, Model selection and estimation in regression with grouped variables.  
793 *Journal of the Royal Statistical Society B* 68: 49-67.

794 Yuan, M., Ekici, A., Lu, Z., Monteiro, R., 2007, Dimension reduction and coefficient estima-  
795 tion in multivariate linear regression. *Journal of the Royal Statistical Society B* 69: 329-346.

## 796 13 Appendices

### 797 13.1 Appendix A: Excursus on the MLAP distribution

#### 798 13.1.1 Three bivariate Laplace distributions

799 For illustration, consider three bivariate Laplace distributions, all having null means but distinct  
800 scale matrices, as follows:

$$801 \quad \Sigma_1 = \begin{bmatrix} 1 & 0 \\ 0 & 1 \end{bmatrix}; \quad \Sigma_2 = \begin{bmatrix} 1 & 0.2 \\ 0.2 & 1 \end{bmatrix}; \quad \Sigma_3 = \begin{bmatrix} 1 & -0.8 \\ -0.8 & 1 \end{bmatrix}. \quad (40)$$

802 Using (7), the density under  $\Sigma_1$  is

$$803 \quad p(\beta_1, \beta_2 | \Sigma_1) = \frac{1}{8\pi} \exp\left(-\frac{1}{2} \sqrt{\beta_1^2 + \beta_2^2}\right). \quad (41)$$

804 The covariance matrix here,  $\mathbf{B}_1 = 12\Sigma_1$ , is diagonal, so the random variables are uncorrelated  
805 but not independent since (41) cannot be written as the product of two marginal densities.  
806 Under  $\Sigma_2$  and  $\Sigma_3$ , the densities are

$$807 \quad p(\beta_1, \beta_2 | \Sigma_2) = \frac{5\sqrt{6}}{96\pi} \exp\left(-\frac{1}{2} \sqrt{\frac{25}{24}\beta_1^2 - \frac{5}{12}\beta_1\beta_2 + \frac{25}{24}\beta_2^2}\right), \quad (42)$$

808 and

$$809 \quad p(\beta_1, \beta_2 | \Sigma_3) = \frac{5}{24\pi} \exp\left(-\frac{1}{2} \sqrt{\left(\frac{25}{9}\beta_1^2 + \frac{40}{9}\beta_1\beta_2 + \frac{25}{9}\beta_2^2\right)}\right), \quad (43)$$

810 Five bivariate Laplace densities are shown in Supplementary Figure 1. (a) gives the density of  
811 the distribution of the two uncorrelated bivariate Laplace random variables ( $\Sigma_1$ ), and (b) and (c)  
812 show the positively (i.e., with  $\Sigma_2$ ) and negatively (with  $\Sigma_3$ ) correlated situations, respectively.  
813 These three densities have a sharp mode at  $\beta_1 = \beta_2 = 0$  indicating that a bivariate Laplace  
814 prior would strongly shrink vectors to the  $(0, 0)$  point, acting similarly to the DE prior in the  
815 univariate Bayesian LASSO. (d) and (e) displays bivariate Laplace densities of distributions with  
816 non-null means.

#### 817 13.1.2 Conditional distributions

818 Dropping subscript  $j$  denoting a specific marker, partition the  $T \times 1$  vector of effects into  $\beta' =$   
819  $(\beta'_1, \beta'_2)$  where the sub-vectors have orders  $T_1$  and  $T_2$ , respectively; recall that  $T$  is the number  
820 of traits. Correspondingly, put

$$821 \quad \Sigma = \begin{bmatrix} \Sigma_{11} & \Sigma_{12} \\ \Sigma_{21} & \Sigma_{22} \end{bmatrix}. \quad (44)$$

822 According to J. M. Marín (personal communication), the conditional distribution  $[\beta_2|\beta_1]$  has  
 823 density

$$\begin{aligned}
 824 \quad p(\beta_2|\beta_1, \mu_{2|1}, \Sigma_{2|1}) &= \frac{\Gamma\left(\frac{T-T_1}{2}\right)}{|\Sigma_{22}|^{\frac{1}{2}} \pi^{\frac{T-T_1}{2}} \int_0^{\infty} t^{\frac{T-T_1}{2}-1} \exp\left\{-\frac{1}{2}\sqrt{t+q_1}\right\} dt} \\
 825 \quad &\times \exp\left\{-\frac{1}{2}\left[\sqrt{(\beta_2 - \mu_{2|1})' \Sigma_{2|1}^{-1} (\beta_2 - \mu_{2|1}) + q_1}\right]\right\}, \quad (45)
 \end{aligned}$$

826 where  $\mu_{2|1} = \Sigma_{22}\Sigma_{11}^{-1}\beta_1$ ,  $\Sigma_{2|1} = \Sigma_{22} - \Sigma_{21}\Sigma_{11}^{-1}\Sigma_{12}$  and  $q_1 = \beta_1'\Sigma_{11}^{-1}\beta_1$ . Similar to multivariate  
 827 normal distribution, the conditional expectation is linear on the conditioning variable and  $\Sigma_{2|1}$   
 828 does not involve  $\beta$ .

### 829 13.1.3 Simulation of a multivariate Laplace distribution

830 Gómez et al. (2007) showed that  $S$  independent draws from a MLAP distribution with a null  
 831 mean vector can be made as

$$832 \quad \beta_i = r_i \mathbf{C}' \mathbf{u}_i; \quad i = 1, 2, \dots, S, \quad (46)$$

833 where  $\mathbf{C}'$  results from the Cholesky decomposition  $\Sigma = \mathbf{C}'\mathbf{C}$ ,  $\mathbf{u}$  is a  $T \times 1$  vector uniformly  
 834 distributed on a  $T$ -dimensional unit sphere and  $r$  is a realization of a Gamma distribution  
 835 with shape parameter  $T$  and scale 2. Vector  $\mathbf{u}$  can be simulated by effecting  $T$  independent  
 836 draws  $(x_i; i = 1, 2, \dots, T)$  from a  $N(0, 1)$  distribution, and then forming the  $t^{th}$  element of  $\mathbf{u}$  as

$$837 \quad u_t = x_t / \sqrt{\sum_{t=1}^T x_t^2}, \quad t = 1, 2, \dots, T.$$

838 Marginal distributions for the three bivariate Laplace distributions with scale matrices  $\Sigma_1$ ,  
 839  $\Sigma_2$  and  $\Sigma_3$  given above were estimated by sampling  $S = 300,000$  independent realizations;  
 840 (46) was employed. Using the samples, zero-mean DE and normal distributions with the same  
 841 variances were fitted, and the resulting densities were compared with the estimated densities  
 842 based on the draws. As shown in Supplementary Figure 2, a normal distribution provided a  
 843 poor approximation to the marginals from the three bivariate Laplace cases, and the sharp peak  
 844 at 0, characteristic of a DE density, was not matched by such marginals. This is a corroboration  
 845 of theoretical results in Gómez et al. (2007): marginals from MLAP distributions are elliptically  
 846 contoured and not DE.

## 847 **13.2 Appendix B: Mean vector of location parameters given ELSE**

848 Consider (19). For  $T = 3$ , let

$$849 \quad \mathbf{R}_0^{-1} = \begin{bmatrix} r^{11} & r^{12} & r^{13} \\ r^{21} & r^{22} & r^{23} \\ r^{31} & r^{32} & r^{33} \end{bmatrix} \quad \text{and} \quad \Sigma^{-1} = \begin{bmatrix} \Sigma^{11} & \Sigma^{12} & \Sigma^{13} \\ \Sigma^{21} & \Sigma^{22} & \Sigma^{23} \\ \Sigma^{31} & \Sigma^{32} & \Sigma^{33} \end{bmatrix} \quad (47)$$

850 Expansion of the Kronecker products in (19) produces the system

$$851 \quad \begin{bmatrix} r^{11}N & r^{12}N & r^{13}N & r^{11}\mathbf{1}'_N\mathbf{X} & r^{12}\mathbf{1}'_N\mathbf{X} & r^{13}\mathbf{1}'_N\mathbf{X} \\ r^{21}N & r^{22}N & r^{23}N & r^{21}\mathbf{1}'_N\mathbf{X} & r^{22}\mathbf{1}'_N\mathbf{X} & r^{23}\mathbf{1}'_N\mathbf{X} \\ r^{31}N & r^{32}N & r^{33}N & r^{31}\mathbf{1}'_N\mathbf{X} & r^{32}\mathbf{1}'_N\mathbf{X} & r^{33}\mathbf{1}'_N\mathbf{X} \\ r^{11}\mathbf{X}'\mathbf{1}_N & r^{12}\mathbf{X}'\mathbf{1}_N & r^{13}\mathbf{X}'\mathbf{1}_N & r^{11}\mathbf{X}'\mathbf{X} + \Sigma^{11}\mathbf{D}^{-1} & r^{12}\mathbf{X}'\mathbf{X} + \Sigma^{12}\mathbf{D}^{-1} & r^{13}\mathbf{X}'\mathbf{X} + \Sigma^{13}\mathbf{D}^{-1} \\ r^{21}\mathbf{X}'\mathbf{1}_N & r^{22}\mathbf{X}'\mathbf{1}_N & r^{23}\mathbf{X}'\mathbf{1}_N & r^{21}\mathbf{X}'\mathbf{X} + \Sigma^{21}\mathbf{D}^{-1} & r^{22}\mathbf{X}'\mathbf{X} + \Sigma^{22}\mathbf{D}^{-1} & r^{23}\mathbf{X}'\mathbf{X} + \Sigma^{23}\mathbf{D}^{-1} \\ r^{31}\mathbf{X}'\mathbf{1}_N & r^{32}\mathbf{X}'\mathbf{1}_N & r^{33}\mathbf{X}'\mathbf{1}_N & r^{31}\mathbf{X}'\mathbf{X} + \Sigma^{31}\mathbf{D}^{-1} & r^{32}\mathbf{X}'\mathbf{X} + \Sigma^{32}\mathbf{D}^{-1} & r^{33}\mathbf{X}'\mathbf{X} + \Sigma^{33}\mathbf{D}^{-1} \end{bmatrix} \begin{bmatrix} \bar{\mu}_1 \\ \bar{\mu}_2 \\ \bar{\mu}_3 \\ \bar{\beta}_1^* \\ \bar{\beta}_2^* \\ \bar{\beta}_3^* \end{bmatrix} \\ 852 \quad = \begin{bmatrix} \mathbf{1}'_N(r^{11}\mathbf{y}_1^* + r^{12}\mathbf{y}_2^* + r^{13}\mathbf{y}_3^*) \\ \mathbf{1}'_N(r^{21}\mathbf{y}_1^* + r^{22}\mathbf{y}_2^* + r^{23}\mathbf{y}_3^*) \\ \mathbf{1}'_N(r^{31}\mathbf{y}_1^* + r^{32}\mathbf{y}_2^* + r^{33}\mathbf{y}_3^*) \\ \mathbf{X}'(r^{11}\mathbf{y}_1^* + r^{12}\mathbf{y}_2^* + r^{13}\mathbf{y}_3^*) \\ \mathbf{X}'(r^{21}\mathbf{y}_1^* + r^{22}\mathbf{y}_2^* + r^{23}\mathbf{y}_3^*) \\ \mathbf{X}'(r^{31}\mathbf{y}_1^* + r^{32}\mathbf{y}_2^* + r^{33}\mathbf{y}_3^*) \end{bmatrix}. \quad (48)$$

853 Observe how phenotypes for all traits contribute to the solutions of trait-specific effects.

## 854 **13.3 Appendix C: Sampling from the conditional posterior distribu-** 855 **tion of $v_j^2$**

856 Consider (29). Let  $Q = \beta_j'\Sigma^{-1}\beta_j$  take values  $\frac{1}{2}, 1, 4$ , and 10, say. Numerical integration of  
857 (29) between 0 and 1000 produces 3.5203, 3.0407, 1.8443, 1.0314 as reciprocal of the resulting  
858 integration constants, with the normalized densities shown in Supplementary Figure 3. The  
859 distributions are skewed, and as  $Q$  increases the density becomes flatter.

860 Let  $S_{\frac{1}{2}}(y; \sigma)$  be the Lévy density of a positive random variable  $Y$  having a positive stable  
861 distribution with parameter  $\sigma$  (Samorodnitsky and Taqqu 2000). From Gómez et al. (2007) and

862 Gómez-Sánchez-Manzano et al. (2008) the Lévy density is

$$863 \quad S_{\frac{1}{2}}(y; \sigma) = \frac{\left(\frac{\sigma}{4}\right)^{\frac{1}{2}}}{\Gamma\left(\frac{1}{2}\right)} y^{-\frac{1}{2}-1} \exp\left(-\frac{\sigma}{4y}\right), \quad (49)$$

864 which is that of an inverse Gamma (*IG*) distribution with parameters  $\alpha = \frac{1}{2}$  and  $\beta = \frac{\sigma}{4}$ .  
 865 Consider now the transformation (Gómez et al. 2007)  $w_j = 2/v_j^2$  so using (29)

$$866 \quad p(w_j|ELSE) \propto \left(\frac{2}{w_j}\right)^{-\frac{1}{2}} \exp\left[-\frac{Q_j + \frac{1}{w_j^2}}{\frac{4}{w_j}}\right] \frac{2}{w_j^2}$$

$$867 \quad \propto w_j^{-\frac{1}{2}-1} \exp\left[-\frac{w_j Q_j}{4}\right] \exp\left[-\frac{1}{4w_j}\right]. \quad (50)$$

868 Consider a Metropolis-Hastings ratio  $R$  using (49) with  $\sigma = 1$  as proposal distribution, and (18)  
 869 let  $y_j$  be a proposed value and  $w_j$  be a member of the target distribution. The ratio is then

$$870 \quad R = \frac{y_j^{-\frac{1}{2}-1} \exp\left[-\frac{y_j Q_j}{4}\right] \exp\left[-\frac{1}{4y_j}\right]}{w_j^{-\frac{1}{2}-1} \exp\left[-\frac{w_j Q_j}{4}\right] \exp\left[-\frac{1}{4w_j}\right]} \times \frac{w_j^{-\frac{1}{2}-1} \exp\left(-\frac{1}{4w_j}\right)}{y_j^{-\frac{1}{2}-1} \exp\left(-\frac{1}{4y}\right)}$$

$$871 \quad = \exp\left[\frac{Q_j}{4}(w_j - y_j)\right]; \quad j = 1, 2, \dots, p. \quad (51)$$

872 Hence if a proposal  $y_j$  is drawn from  $IG(\alpha = \frac{1}{2}, \beta = \frac{1}{4})$ , it can be accepted as belonging to  
 873 the conditional posterior distribution of  $w_j$ , with probability equal to  $R$  above. If accepted, a  
 874 "new"  $v_j^2 = 2/w_j$  is a member of  $p(v_j^2|ELSE)$  with probability  $R$  as well; otherwise stay with  
 875 the current  $v_j^2$ .

### 876 **13.4 Appendix D: Alternative algorithm for indirect sampling of** 877 **marker effects**

878 An alternative sampling scheme that uses an equivalent formulation of the model is presented;  
 879 a two-trait ( $T = 2$ ) situation is employed for ease of presentation. Let  $\mathbf{g}_1 = \mathbf{X}\boldsymbol{\beta}_1^*$  and  $\mathbf{g}_2 = \mathbf{X}\boldsymbol{\beta}_2^*$   
 880 be the genomic values of the  $N$  individuals for each of the traits. A model could be

$$881 \quad \begin{pmatrix} \mathbf{y}_1 \\ \mathbf{y}_2 \end{pmatrix} = \begin{pmatrix} \mathbf{1}\mu_1 \\ \mathbf{1}\mu_2 \end{pmatrix} + \begin{pmatrix} \mathbf{g}_1 \\ \mathbf{g}_2 \end{pmatrix} + \begin{pmatrix} \mathbf{e}_1 \\ \mathbf{e}_2 \end{pmatrix}, \quad (52)$$

882 where residuals are as before. In a standard genomic best linear unbiased prediction (GBLUP,  
883 Van Raden 2008) setting, it is assumed that

$$884 \quad \begin{bmatrix} \mathbf{g}_1 \\ \mathbf{g}_2 \end{bmatrix} | \mathbf{G}, \mathbf{G}_0 \sim N \left( \begin{bmatrix} \mathbf{0} \\ \mathbf{0} \end{bmatrix}, \mathbf{G}_0 \otimes \mathbf{G}, \right) \quad (53)$$

885 where  $\mathbf{G}$  is an  $N \times N$  marker-based matrix of "genomic relationships", and

$$886 \quad \mathbf{G}_0 = \begin{bmatrix} \sigma_{g_1}^2 & \sigma_{g_{12}} \\ \sigma_{g_{12}} & \sigma_{g_2}^2 \end{bmatrix} \quad (54)$$

887 is a matrix containing the trait-specific genomic variances and their covariances. Specifically,  
888 from the definition of  $\mathbf{g}_1$  and  $\mathbf{g}_2$ , and assuming that  $\beta_t^* | \sigma_{\beta_t}^2 \sim N(\mathbf{0}, \mathbf{I} \sigma_{\beta_t}^2)$  ( $t = 1, 2$ )

$$889 \quad \text{Var}(\mathbf{g}_t | \mathbf{X}, \sigma_{\beta_t}^2) = \frac{1}{p} \mathbf{X} \mathbf{X}' (p \sigma_{\beta_t}^2) = \mathbf{G} \sigma_{g_t}^2; \quad t = 1, 2, \quad (55)$$

890 for  $\mathbf{G} = \mathbf{X} \mathbf{X}' / p$  and  $\sigma_{g_i}^2 = p \sigma_{\beta_i}^2$ . Similarly,  $\text{Cov}(\mathbf{g}_1, \mathbf{g}_2 | \mathbf{X}, \sigma_{\beta_{12}}) = \mathbf{G} \sigma_{g_{12}}$ , where  $\sigma_{g_{12}} = p \sigma_{\beta_{12}}$  and  
891  $\sigma_{\beta_{12}}$  is the covariance between marker effects on traits 1 and 2. Let  $\mathbf{B} = \{\sigma_{\beta_{tt'}}\}$  be the  $2 \times 2$   
892 variance-covariance matrix of marker effects

893 For a bivariate Bayesian LASSO model, conditionally on the  $p \times 1$  vector  $\mathbf{v}^2$ , one has

$$894 \quad \begin{bmatrix} \beta_1^* \\ \beta_2^* \end{bmatrix} | \Sigma, \mathbf{v}^2 \sim N \left( \begin{bmatrix} \mathbf{0} \\ \mathbf{0} \end{bmatrix}, \Sigma \otimes \mathbf{D}, \right). \quad (56)$$

895 Hence

$$896 \quad \begin{bmatrix} \mathbf{g}_1 \\ \mathbf{g}_2 \end{bmatrix} | \Sigma, \mathbf{v}^2 \\ 897 \quad \sim N \left( \begin{bmatrix} \mathbf{0} \\ \mathbf{0} \end{bmatrix}, \begin{bmatrix} \mathbf{X} & \mathbf{0} \\ \mathbf{0} & \mathbf{X} \end{bmatrix} (\Sigma \otimes \mathbf{D}) \begin{bmatrix} \mathbf{X}' & \mathbf{0} \\ \mathbf{0} & \mathbf{X}' \end{bmatrix} \right) \\ 898 \quad = N \left( \begin{bmatrix} \mathbf{0} \\ \mathbf{0} \end{bmatrix}, \Sigma \otimes \mathbf{X} \mathbf{D} \mathbf{X}' \right). \quad (57)$$

899 Let  $\mathbf{C}_{Cond} = \Sigma \otimes \mathbf{X} \mathbf{D} \mathbf{X}'$ . Further,

$$900 \quad E \left( \begin{bmatrix} \mathbf{y}_1 \\ \mathbf{y}_2 \end{bmatrix} | \Sigma, \mathbf{v}^2, \mathbf{R}_0 \right) = \begin{pmatrix} \mathbf{1} \mu_1 \\ \mathbf{1} \mu_2 \end{pmatrix}, \quad (58)$$



901 and

$$902 \quad \text{Var} \left( \begin{bmatrix} \mathbf{y}_1 \\ \mathbf{y}_2 \end{bmatrix} \mid \boldsymbol{\Sigma}, \mathbf{v}^2, \mathbf{R}_0 \right) = \mathbf{C}_{\text{Cond}} + \mathbf{R}_0 \otimes \mathbf{I} = \mathbf{V}_{\text{Cond}}. \quad (59)$$

903 After assigning a flat prior to each of  $\mu_1$  and  $\mu_2$ , standard results give that posterior distribution  
904 of the genotypic values given  $\boldsymbol{\Sigma}, \mathbf{v}^2, \mathbf{R}_0$  is normal, with mean vector

$$905 \quad E \left( \begin{bmatrix} \mathbf{g}_1 \\ \mathbf{g}_2 \end{bmatrix} \mid \boldsymbol{\Sigma}, \mathbf{v}^2, \mathbf{R}_0, \mathbf{y} \right) = \mathbf{C}_{\text{Cond}} \mathbf{V}_{\text{Cond}}^{-1} \left( \begin{bmatrix} \mathbf{y}_1 - \mathbf{1} \tilde{\mu}_1 \\ \mathbf{y}_2 - \mathbf{1} \tilde{\mu}_2 \end{bmatrix} \right) = \begin{bmatrix} \tilde{\mathbf{g}}_1 \\ \tilde{\mathbf{g}}_2 \end{bmatrix}, \quad (60)$$

906 where

$$907 \quad \begin{bmatrix} \tilde{\mu}_1 \\ \tilde{\mu}_2 \end{bmatrix} = \left\{ \begin{bmatrix} \mathbf{1}' & 0 \\ 0 & \mathbf{1}' \end{bmatrix} \mathbf{V}_{\text{Cond}}^{-1} \begin{bmatrix} \mathbf{1} & 0 \\ 0 & \mathbf{1} \end{bmatrix} \right\}^{-1} \\ 908 \quad \times \left\{ \begin{bmatrix} \mathbf{1}' & 0 \\ 0 & \mathbf{1}' \end{bmatrix} \mathbf{V}_{\text{Cond}}^{-1} \begin{bmatrix} \mathbf{y}_1 \\ \mathbf{y}_2 \end{bmatrix} \right\}^{-1}.$$

909 Further (Henderson 1975)

$$910 \quad \text{Var} \left( \begin{bmatrix} \mathbf{g}_1 \\ \mathbf{g}_2 \end{bmatrix} \mid \boldsymbol{\Sigma}, \mathbf{v}^2, \mathbf{R}_0, \mathbf{y} \right) \\ 911 \quad = \mathbf{C}_{\text{Cond}} - \mathbf{C}_{\text{Cond}} \mathbf{V}_{\text{Cond}}^{-1} \mathbf{C}_{\text{Cond}} + \mathbf{C}_{\text{Cond}} \mathbf{V}_{\text{Cond}}^{-1} \mathbf{1} (\mathbf{1}' \mathbf{V}_{\text{Cond}}^{-1} \mathbf{1}) \mathbf{1}' \mathbf{V}_{\text{Cond}}^{-1} \mathbf{C}_{\text{Cond}} \\ 912 \quad = \mathbf{C}_{\text{Cond}} - \mathbf{C}_{\text{Cond}} \left[ \mathbf{V}_{\text{Cond}}^{-1} - \mathbf{V}_{\text{Cond}}^{-1} \mathbf{1} (\mathbf{1}' \mathbf{V}_{\text{Cond}}^{-1} \mathbf{1}) \mathbf{1}' \mathbf{V}_{\text{Cond}}^{-1} \right] \mathbf{C}_{\text{Cond}}. \quad (61)$$

913 Hence, draws from the conditional posterior distribution of  $\mathbf{g} = \begin{bmatrix} \mathbf{g}_1 & \mathbf{g}_2 \end{bmatrix}'$  given  $\boldsymbol{\Sigma}, \mathbf{v}^2$  and  $\mathbf{R}_0$   
914 can be obtained by sampling from a multivariate normal distribution with mean vector (60) and  
915 covariance matrix (61).

916 Assuming that, given  $\boldsymbol{\Sigma}, \mathbf{v}^2$  and  $\mathbf{R}_0$ , the vector  $\begin{bmatrix} \boldsymbol{\beta}_1^{*'} & \boldsymbol{\beta}_2^{*'} & \mathbf{g}_1' & \mathbf{g}_2' \end{bmatrix}'$  has a multivariate  
917 normal distribution, and let  $\boldsymbol{\beta}^{*'} = \begin{bmatrix} \boldsymbol{\beta}_1^{*'} & \boldsymbol{\beta}_2^{*'} \end{bmatrix}'$ . Hence

$$918 \quad E(\boldsymbol{\beta}^* \mid \boldsymbol{\Sigma}, \mathbf{v}^2, \mathbf{R}_0, \mathbf{y}) = E_{\mathbf{g} \mid \boldsymbol{\Sigma}, \mathbf{v}^2, \mathbf{R}_0, \mathbf{y}} [\boldsymbol{\beta}^* \mid \mathbf{g}, \boldsymbol{\Sigma}, \mathbf{v}^2, \mathbf{R}_0] \\ 919 \quad = E_{\mathbf{g} \mid \boldsymbol{\Sigma}, \mathbf{v}^2, \mathbf{R}_0, \mathbf{y}} \left[ \text{Cov}(\boldsymbol{\beta}^*, \mathbf{g}') (\boldsymbol{\Sigma} \otimes \mathbf{XDX}')^{-1} \mathbf{g} \right] \\ 920 \quad = \text{Cov}(\boldsymbol{\beta}^*, \mathbf{g}') (\boldsymbol{\Sigma} \otimes \mathbf{XDX}')^{-1} \tilde{\mathbf{g}} = \tilde{\boldsymbol{\beta}}^*. \quad (62)$$

921 Now,

$$922 \quad \text{Cov}(\boldsymbol{\beta}^*, \mathbf{g}') = \text{Cov} \left( \begin{bmatrix} \boldsymbol{\beta}_1^* \\ \boldsymbol{\beta}_2^* \end{bmatrix}, \begin{bmatrix} \mathbf{g}_1' & \mathbf{g}_2' \end{bmatrix} \right) \\ 923 \quad = \mathbf{B} \otimes \mathbf{X}', \quad (63)$$

924 SO

$$925 \quad \tilde{\boldsymbol{\beta}}^* = (\mathbf{B} \otimes \mathbf{X}') (\boldsymbol{\Sigma} \otimes \mathbf{XDX}')^{-1} = (\mathbf{B}\boldsymbol{\Sigma}^{-1} \otimes \mathbf{X}'\mathbf{XDX}') \tilde{\mathbf{g}} \quad (64)$$

926 Similarly

$$\begin{aligned} 927 \quad \text{Var}(\boldsymbol{\beta}^* | \boldsymbol{\Sigma}, \mathbf{v}^2, \mathbf{R}_0, \mathbf{y}) &= \text{Var}_{\mathbf{g} | \boldsymbol{\Sigma}, \mathbf{v}^2, \mathbf{R}_0, \mathbf{y}} [E(\boldsymbol{\beta}^* | \mathbf{g}, \boldsymbol{\Sigma}, \mathbf{v}^2, \mathbf{R}_0)] \\ 928 &\quad + E_{\mathbf{g} | \boldsymbol{\Sigma}, \mathbf{v}^2, \mathbf{R}_0, \mathbf{y}} \text{Var}[\boldsymbol{\beta}^* | \mathbf{g}, \boldsymbol{\Sigma}, \mathbf{v}^2, \mathbf{R}_0] \\ 929 &= \text{Var}_{\mathbf{g} | \boldsymbol{\Sigma}, \mathbf{v}^2, \mathbf{R}_0, \mathbf{y}} [(\mathbf{B}\boldsymbol{\Sigma}^{-1} \otimes \mathbf{X}'\mathbf{XDX}') \mathbf{g}] \\ 930 &\quad + (\mathbf{B} \otimes \mathbf{I}) (\boldsymbol{\Sigma} \otimes \mathbf{XDX}')^{-1} (\mathbf{B} \otimes \mathbf{I}) \\ 931 &= \mathbf{B}\boldsymbol{\Sigma}^{-1} \mathbf{B} \otimes (\mathbf{XDX}')^{-1}. \end{aligned} \quad (65)$$

### 932 **13.5 Appendix E: A conditional posterior mode approximation to** 933 **marker effects**

934 In spite of important advances in high-throughput computing, routine genetic evaluation of  
935 plants and animals is seldom done with MCMC methods. As an alternative to MCMC, we  
936 describe an iterative algorithm that produces point estimates of marker effects (and of linear  
937 functions thereof) and approximate measures of uncertainty in a computationally simpler man-  
938 ner. The algorithm uses a re-weighted set of linear "mixed model equations", for which extremely  
939 efficient solvers exist. It is assumed that "good" estimates of  $\mathbf{R}_0$  (the residual covariance ma-  
940 trix) and of  $\mathbf{B}$  (the  $T \times T$  variance-covariance matrix of markers effects) are available. From (8)  
941  $\boldsymbol{\Sigma} = \mathbf{B} / [4(T + 1)]$ , e.g., for  $T = 3$  then  $\boldsymbol{\Sigma} = \mathbf{B} / 16$ ; hence, an assessment of the scale matrix of  
942 the MLAP distribution is easily available.

943 We make use of (2) and of (7) but employ the "markers within trait" representation given in  
944 (4). Letting  $\boldsymbol{\theta} = (\boldsymbol{\mu}', \boldsymbol{\beta}')'$ , the logarithm of the joint (conditionally on the dispersion matrices)  
945 posterior density of location effects, apart from a constant, is

$$\begin{aligned} 946 \quad &\log [p(\boldsymbol{\theta} | \mathbf{R}_0, \boldsymbol{\Sigma}, \text{DATA})] \\ 947 \quad &= -\frac{1}{2} \{ \mathbf{y}^* - (\mathbf{I}_3 \otimes \mathbf{1}_N) \boldsymbol{\mu} - (\mathbf{I}_3 \otimes \mathbf{X}) \boldsymbol{\beta}^* \}' (\mathbf{R}_0^{-1} \otimes \mathbf{I}_N) \{ \mathbf{y}^* - (\mathbf{I}_3 \otimes \mathbf{1}_N) \boldsymbol{\mu} - (\mathbf{I}_3 \otimes \mathbf{X}) \boldsymbol{\beta}^* \} \\ 948 \quad &\quad - \frac{1}{2} \sum_{j=1}^p \sqrt{\boldsymbol{\beta}'_j \boldsymbol{\Sigma}^{-1} \boldsymbol{\beta}_j} = L(\boldsymbol{\theta}) \end{aligned} \quad (66)$$

949 Let

$$950 \quad L(\boldsymbol{\theta}) = L_{lik}(\boldsymbol{\mu}, \boldsymbol{\beta}^*) + L_{prior}(\boldsymbol{\beta}), \quad (67)$$

951 where  $L_{lik}(\boldsymbol{\mu}, \boldsymbol{\beta}^*)$  and  $L_{prior}(\boldsymbol{\beta})$  are the two terms in (66). Then

$$952 \quad \frac{\partial L_{lik}(\boldsymbol{\mu}, \boldsymbol{\beta}^*)}{\partial \boldsymbol{\mu}} = (\mathbf{R}_0^{-1} \otimes \mathbf{1}'_N) [\mathbf{y}^* - (\mathbf{I}_3 \otimes \mathbf{1}_N) \boldsymbol{\mu} - (\mathbf{I}_3 \otimes \mathbf{X}) \boldsymbol{\beta}^*]. \quad (68)$$

953 and

$$954 \quad \frac{\partial L_{lik}(\boldsymbol{\mu}, \boldsymbol{\beta}^*)}{\partial \boldsymbol{\beta}^*} = (\mathbf{R}_0^{-1} \otimes \mathbf{X}') [\mathbf{y}^* - (\mathbf{I}_3 \otimes \mathbf{1}_N) \boldsymbol{\mu} - (\mathbf{I}_3 \otimes \mathbf{X}) \boldsymbol{\beta}^*] \quad (69)$$

955 Observe now that the relationship between  $\boldsymbol{\beta}$  and marker effects sorted within traits ( $\boldsymbol{\beta}^*$ ) can  
 956 be expressed as  $\boldsymbol{\beta} = \mathbf{L}\boldsymbol{\beta}^*$  where  $\mathbf{L}$  is a  $3p \times 3p$  non-singular matrix of elementary operators that  
 957 rearrange rows and columns. For example, for  $T = 3$  and  $p = 2$  and with  $\beta_{jt}$  representing the  
 958 effect of marker  $j$  on trait  $t$ ,

$$959 \quad \begin{bmatrix} \beta_{11} \\ \beta_{12} \\ \beta_{13} \\ \beta_{21} \\ \beta_{22} \\ \beta_{23} \end{bmatrix} = \begin{bmatrix} 1 & 0 & 0 & 0 & 0 & 0 \\ 0 & 0 & 1 & 0 & 0 & 0 \\ 0 & 0 & 0 & 0 & 1 & 0 \\ 0 & 1 & 0 & 0 & 0 & 0 \\ 0 & 0 & 0 & 1 & 0 & 0 \\ 0 & 0 & 0 & 0 & 0 & 1 \end{bmatrix} \begin{bmatrix} \beta_{11}^* \\ \beta_{21}^* \\ \beta_{12}^* \\ \beta_{22}^* \\ \beta_{13}^* \\ \beta_{23}^* \end{bmatrix}. \quad (70)$$

960 Since  $\mathbf{L}$  is a matrix of elementary operators,  $\mathbf{L}^{-1} = \mathbf{L}'$  (orthogonality) and  $\boldsymbol{\beta}^* = \mathbf{L}'\boldsymbol{\beta}$ ; the absolute  
 961 value of the Jacobian of the transformation from  $\boldsymbol{\beta}$  to  $\boldsymbol{\beta}^*$  is equal to 1. The contribution of the  
 962 prior to the gradient for marker effects is then

$$963 \quad \frac{\partial}{\partial \boldsymbol{\beta}} L_{prior}(\boldsymbol{\beta}) = -\boldsymbol{\Sigma}^{-1} \frac{1}{m_j} \boldsymbol{\beta}_j = \begin{bmatrix} \frac{1}{m_j} (\Sigma^{11} \beta_{j1} + \Sigma^{12} \beta_{j2} + \Sigma^{13} \beta_{j3}) \\ \frac{1}{m_j} (\Sigma^{21} \beta_{j1} + \Sigma^{22} \beta_{j2} + \Sigma^{23} \beta_{j3}) \\ \frac{1}{m_j} (\Sigma^{31} \beta_{j1} + \Sigma^{32} \beta_{j2} + \Sigma^{33} \beta_{j3}) \end{bmatrix}; \quad j = 1, 2, \dots, p. \quad (71)$$

964 where  $m_j = 2\sqrt{\boldsymbol{\beta}'_j \boldsymbol{\Sigma}^{-1} \boldsymbol{\beta}_j}$  is proportional to the the Mahalanobis distance of  $\boldsymbol{\beta}_j$  away from  
 965  $(0, 0, 0)$  for  $T = 3$ . Hence, the  $3p \times 1$  vector of derivatives with respect to all marker effects,  
 966 sorted by traits within individuals is

$$967 \quad \frac{\partial}{\partial \boldsymbol{\beta}} L_{prior}(\boldsymbol{\beta}) = - \begin{bmatrix} \boldsymbol{\Sigma}^{-1} m_1 \boldsymbol{\beta}_1 \\ \boldsymbol{\Sigma}^{-1} m_2 \boldsymbol{\beta}_2 \\ \cdot \\ \cdot \\ \cdot \\ \boldsymbol{\Sigma}^{-1} m_p \boldsymbol{\beta}_p \end{bmatrix} = - (\mathbf{M}^{-1} \otimes \boldsymbol{\Sigma}^{-1}) \boldsymbol{\beta}, \quad (72)$$

968 where  $\mathbf{M} = \text{Diag}\{m_j\}$  is a  $p \times p$  diagonal matrix with typical element  $m_j$ . Rearranging the  
 969 differentials such that the sorting is by markers within traits

$$970 \quad \frac{\partial}{\partial \boldsymbol{\beta}^*} L_{\text{prior}}(\boldsymbol{\beta}^*) = -(\boldsymbol{\Sigma}^{-1} \otimes \mathbf{M}^{-1}) \boldsymbol{\beta}^*. \quad (73)$$

971 Collecting (69) and (73),

$$972 \quad \begin{aligned} \frac{\partial}{\partial \boldsymbol{\beta}^*} L(\boldsymbol{\theta}) &= \frac{\partial}{\partial \boldsymbol{\beta}^*} L_{\text{lik}}(\boldsymbol{\theta}) + \frac{\partial}{\partial \boldsymbol{\beta}^*} L_{\text{prior}}(\boldsymbol{\beta}^*) \\ 973 \quad &= (\mathbf{R}_0^{-1} \otimes \mathbf{X}') [\mathbf{y}^* - (\mathbf{I}_3 \otimes \mathbf{1}_N) \boldsymbol{\mu} - (\mathbf{I}_3 \otimes \mathbf{X}) \boldsymbol{\beta}^*] - (\boldsymbol{\Sigma}^{-1} \otimes \mathbf{M}^{-1}) \boldsymbol{\beta}^*, \end{aligned} \quad (74)$$

974 Setting (68) and (74) simultaneously to  $\mathbf{0}$  produces the system of equations (not explicit)

$$975 \quad \begin{bmatrix} \mathbf{R}_0^{-1} \otimes N & \mathbf{R}_0^{-1} \otimes \mathbf{1}'_N \mathbf{X} \\ \mathbf{R}_0^{-1} \otimes \mathbf{X}' \mathbf{1}_N & (\mathbf{I}_3 \otimes \mathbf{X}' \mathbf{X}) + (\boldsymbol{\Sigma}^{-1} \otimes \mathbf{M}^{-1}) \end{bmatrix} \begin{bmatrix} \bar{\boldsymbol{\mu}} \\ \bar{\boldsymbol{\beta}}^* \end{bmatrix} = \begin{bmatrix} (\mathbf{R}_0^{-1} \otimes \mathbf{1}'_N) \mathbf{y}^* \\ (\mathbf{R}_0^{-1} \otimes \mathbf{X}') \mathbf{y}^* \end{bmatrix}. \quad (75)$$

976 Expanding the equations above for  $T = 3$  yields

$$\begin{bmatrix} r^{11} N & r^{12} N & r^{13} N & r^{11} \mathbf{1}'_N \mathbf{X} & r^{12} \mathbf{1}'_N \mathbf{X} & r^{13} \mathbf{1}'_N \mathbf{X} \\ r^{21} N & r^{22} N & r^{23} N & r^{21} \mathbf{1}'_N \mathbf{X} & r^{22} \mathbf{1}'_N \mathbf{X} & r^{23} \mathbf{1}'_N \mathbf{X} \\ r^{31} N & r^{32} N & r^{33} N & r^{31} \mathbf{1}'_N \mathbf{X} & r^{32} \mathbf{1}'_N \mathbf{X} & r^{33} \mathbf{1}'_N \mathbf{X} \\ r^{11} \mathbf{X}' \mathbf{1}_N & r^{12} \mathbf{X}' \mathbf{1}_N & r^{13} \mathbf{X}' \mathbf{1}_N & \mathbf{X}' r^{11} \mathbf{X} + \Sigma^{11} \mathbf{M}^{-1} & \mathbf{X}' r^{12} \mathbf{X} + \Sigma^{12} \mathbf{M}^{-1} & \mathbf{X}' r^{13} \mathbf{X} + \Sigma^{13} \mathbf{M}^{-1} \\ r^{21} \mathbf{X}' \mathbf{1}_N & r^{22} \mathbf{X}' \mathbf{1}_N & r^{23} \mathbf{X}' \mathbf{1}_N & \mathbf{X}' r^{21} \mathbf{X} + \Sigma^{21} \mathbf{M}^{-1} & \mathbf{X}' r^{22} \mathbf{X} + \Sigma^{22} \mathbf{M}^{-1} & \mathbf{X}' r^{23} \mathbf{X} + \Sigma^{23} \mathbf{M}^{-1} \\ r^{31} \mathbf{X}' \mathbf{1}_N & r^{32} \mathbf{X}' \mathbf{1}_N & r^{33} \mathbf{X}' \mathbf{1}_N & \mathbf{X}' r^{31} \mathbf{X} + \Sigma^{31} \mathbf{M}^{-1} & \mathbf{X}' r^{32} \mathbf{X} + \Sigma^{32} \mathbf{M}^{-1} & \mathbf{X}' r^{33} \mathbf{X} + \Sigma^{33} \mathbf{M}^{-1} \end{bmatrix}^{[b]} \times \begin{bmatrix} \bar{\mu}_1 \\ \bar{\mu}_2 \\ \bar{\mu}_3 \\ \bar{\boldsymbol{\beta}}_1^* \\ \bar{\boldsymbol{\beta}}_2^* \\ \bar{\boldsymbol{\beta}}_3^* \end{bmatrix}^{[b+1]} = \begin{bmatrix} \mathbf{1}'_N (r^{11} \mathbf{y}_1^* + r^{12} \mathbf{y}_2^* + r^{13} \mathbf{y}_3^*) \\ \mathbf{1}'_N (r^{21} \mathbf{y}_1^* + r^{22} \mathbf{y}_2^* + r^{23} \mathbf{y}_3^*) \\ \mathbf{1}'_N (r^{31} \mathbf{y}_1^* + r^{32} \mathbf{y}_2^* + r^{33} \mathbf{y}_3^*) \\ \mathbf{X}' (r^{11} \mathbf{y}_1^* + r^{12} \mathbf{y}_2^* + r^{13} \mathbf{y}_3^*) \\ \mathbf{X}' (r^{21} \mathbf{y}_1^* + r^{22} \mathbf{y}_2^* + r^{23} \mathbf{y}_3^*) \\ \mathbf{X}' (r^{31} \mathbf{y}_1^* + r^{32} \mathbf{y}_2^* + r^{33} \mathbf{y}_3^*) \end{bmatrix}^{[b]}, \quad (76)$$

977 where  $b$  is iterate round. Matrix  $\mathbf{M} = \text{Diag}(m_j)$  changes at every round of iteration, so the system  
 978 needs to be reconstituted repeatedly. Marker effects producing small values of the Mahalanobis  
 979 distance away from 0 result in tiny  $m$ -values and, consequently,  $\mathbf{M}^{-1}$  will have large diagonal  
 980 elements. Hence, vectors of markers with weak effects are more strongly shrunk towards the 0  
 981 coordinate than those having strong effects in at least one trait

982 The variance-covariance matrix of the conditional posterior distribution can be approximated

983 as

$$984 \quad \text{Var} \left( \begin{bmatrix} \mu_1 \\ \mu_1 \\ \mu_1 \\ \beta_1^* \\ \beta_2^* \\ \beta_3^* \end{bmatrix} \mid \mathbf{R}_0, \Sigma, \text{DATA} \right) \approx \mathbf{K}_{[\infty]}^{-1}, \quad (77)$$

985 with  $\infty$  indicating parameters evaluated at converged values, assuming that convergence has  
986 been attained at a hopefully global mode.

### 987 13.6 Appendix F: Treatment of missing data

988 Let a multi-trait data point ( $T \times 1$ ) on individual  $i$  be represented as

$$989 \quad \mathbf{y}_i^{\text{complete}} = (\mathbf{y}_i^{\text{miss}}, \mathbf{y}_i^{\text{obs}}), \quad (78)$$

990 where "miss" denotes a missing record, e.g., if  $T = 2$ , a record could be missing for trait 1 or  
991 for trait 2;  $\mathbf{y}_i^{\text{obs}}$  represents the phenotypes for the traits observed in individual  $i$ . The posterior  
992 predictive distribution of  $\mathbf{y}_i^{\text{miss}}$  has density

$$993 \quad p(\mathbf{y}_i^{\text{miss}} \mid \mathbf{y}, \mathbf{R}_0, \Sigma) = \int_{\mathfrak{R}_\mu} \int_{\mathfrak{R}_\beta} p(\mathbf{y}_i^{\text{miss}} \mid \boldsymbol{\mu}, \boldsymbol{\beta}, \mathbf{R}_0, \mathbf{y}_i^{\text{obs}}) p(\boldsymbol{\mu}, \boldsymbol{\beta}, \mathbf{R}_0, \Sigma \mid \mathbf{y}) d\boldsymbol{\mu} d\boldsymbol{\beta} d\mathbf{R}_0 d\Sigma, \quad (79)$$

994 provided that data points in  $i$  are conditionally (given  $\boldsymbol{\mu}, \boldsymbol{\beta}, \mathbf{R}_0$ ) independent of any other  $i'$  in  
995 the sample, and with  $\mathbf{y}$  being all observed data. The preceding formulae implies that  $\mathbf{y}_i^{\text{miss}}$  can  
996 be imputed by sampling  $\boldsymbol{\mu}, \boldsymbol{\beta}, \mathbf{R}_0, \Sigma$  from their posterior distribution and then drawing from

$$997 \quad \mathbf{y}_i^{\text{miss}} \mid \mathbf{y}, \mathbf{R}_0, \Sigma \sim N(E(\mathbf{y}_i^{\text{miss}} \mid \boldsymbol{\mu}, \boldsymbol{\beta}, \mathbf{R}_0, \mathbf{y}_i^{\text{obs}}), \text{Var}(\mathbf{y}_i^{\text{miss}} \mid \boldsymbol{\mu}, \boldsymbol{\beta}, \mathbf{R}_0, \mathbf{y}_i^{\text{obs}})) \quad (80)$$

998 Since the sampling model is normal, for  $T = 3$  one has

$$999 \quad E(\mathbf{y}_i^{\text{miss}} \mid \boldsymbol{\mu}, \boldsymbol{\beta}, \mathbf{R}_0, \mathbf{y}_i^{\text{obs}}) = \begin{bmatrix} \delta_1 \mu_1 \\ \delta_2 \mu_2 \\ \delta_3 \mu_3 \end{bmatrix} + \begin{bmatrix} \delta_1 \mathbf{x}'_i & \mathbf{0} & \mathbf{0} \\ \mathbf{0} & \delta_2 \mathbf{x}'_i & \mathbf{0} \\ \mathbf{0} & \mathbf{0} & \delta_3 \mathbf{x}'_i \end{bmatrix} \begin{bmatrix} \beta_1^* \\ \beta_2^* \\ \beta_3^* \end{bmatrix} \\ 1000 \quad + \mathbf{R}_0^{[\text{miss}, \text{obs}]} \left( \mathbf{R}_0^{[\text{obs}, \text{obs}]} \right)^{-1} \mathbf{e}^{[\text{obs}]}, \quad (81)$$

1001 where  $\delta_1, \delta_2, \delta_3$  take the value 1 when a given trait is missing in case  $i$ , or denote "exclude from  
1002 formula" otherwise;  $\mathbf{R}_0^{[\text{obs}, \text{obs}]}$  is the part of  $\mathbf{R}_0$  pertaining to observed phenotypes for case  $i$ , and

1003  $\mathbf{R}_0^{[miss,obs]}$  is the submatrix of residual covariances between missing and observed traits. Further,

$$1004 \quad Var(\mathbf{y}_i^{miss} | \boldsymbol{\mu}, \boldsymbol{\beta}, \mathbf{R}_0, \mathbf{y}_i^{obs}) = \mathbf{R}_0^{[miss,miss]} - \mathbf{R}_0^{[miss,obs]} \left( \mathbf{R}_0^{[obs,obs]} \right)^{-1} \mathbf{R}_0^{[obs,miss]} \quad (82)$$

1005 For example, let  $T = 3$  and suppose that trait 1 is missing in case 250 but that traits 2 and  
1006 3 have been recorded; here

$$1007 \quad E(y_{250}^{miss} | \boldsymbol{\mu}, \boldsymbol{\beta}, \mathbf{R}_0, \mathbf{y}_{250}^{obs}) = \mu_1 + \mathbf{x}'_{250} \boldsymbol{\beta}_1^* + \begin{bmatrix} r_{12} & r_{13} \end{bmatrix} \begin{bmatrix} r_{22} & r_{23} \\ r_{32} & r_{33} \end{bmatrix}^{-1} \begin{bmatrix} e_{2,250} \\ e_{3,250} \end{bmatrix}, \quad (83)$$

1008 and

$$1009 \quad Var(y_{250}^{miss} | \boldsymbol{\mu}, \boldsymbol{\beta}, \mathbf{R}_0, \mathbf{y}_{250}^{obs}) = r_{11} - \begin{bmatrix} r_{12} & r_{13} \end{bmatrix} \begin{bmatrix} r_{22} & r_{23} \\ r_{32} & r_{33} \end{bmatrix}^{-1} \begin{bmatrix} r_{12} \\ r_{13} \end{bmatrix}. \quad (84)$$

1010 In the MCMC algorithm, missing data are sampled independently across cases, but dependently  
1011 within case by addressing the pattern of missingness peculiar to each observation. Samples  
1012 for missing observations can be used to estimate predictive distributions for the missing data  
1013 (Gelfand et al. 1992; Sorensen and Gianola 2002; Gelman et al. 2014).

## 1014 14 Legend for Supplemental Figures

1015 Figure S1. Five bivariate Laplace densities.

1016 Figure S2. Double exponential versus marginal (from bivariate Laplace) versus normal den-  
1017 sities

1018 Figure S3. Normalized densities of mixing variable in MCMC algorithm

1019 Figure S4. Shrinkage factor: mean trait 1

1020 Figure S5. Shrinkage factor: mean trait 2

1021 Figure S6. Shrinkage factor: marker 10, trait 1

1022 Figure S7. Shrinkage factor: marker 200, trait 2

1023 Figure S8. Shrinkage factor:  $R0[1,1]$

1024 Figure S9. Shrinkage factor:  $R0[1,2]$

1025 Figure S10. Shrinkage factor:  $R0[2,2]$

1026 Figure S11. Shrinkage factor:  $SIGMA[1,1]$

1027 Figure S12. Shrinkage factor:  $SIGMA[1,2]$

1028 Figure S13. Shrinkage factor:  $SIGMA[2,2]$

1029 Figure S14. Trace plots of  $R0[1,1]$ ,  $R0[1,2]$ ,  $R0[2,2]$

1030 Figure S15. Trace plots of  $SIGMA[1,1]$ ,  $SIGMA[1,2]$ ,  $SIGMA[2,2]$

1031 Figure S16. Path to convergence in MAP-MBL (maximum a posteriori-multiple trait Bayesian  
1032 LASSO)

- 1033 Figure S17. BLUP of marker effects versus MBL posterior means and MAP-MBL solutions
- 1034 Figure S18. Fitted genetic values: BLUP, MBL and MAP-MBL

Figure 1. Bivariate Bayesian LASSO: trace plot and posterior density of residual correlation.

Figure 2. Bivariate Bayesian LASSO: trace plot and posterior density of correlation between marker effects.

Figure 3. Bivariate GBLUP versus bivariate Bayesian LASSO (posterior mean) estimates of marker effects on wheat grain yield.

Figure 4.  $t$ -statistics for marker effects on wheat grain yield: GBLUP versus bivariate Bayesian LASSO (MBL)

Figure 5.  $t$ -statistics for marker effects on wheat grain yield: ordinary least-squares (OLS) versus bivariate Bayesian LASSO (MBL) and bivariate GBLUP.

Figure 6. Mahalanobis squared distance (M) away from (0,0) for bivariate effects on grain yield of 1279 markers: GBLUP versus bivariate Bayesian LASSO (BLASSO)

Figure 7. Predictive correlations for wheat grain yield: bivariate Bayesian LASSO (Bayes L) versus bivariate GBLUP (RR-BLUP).

Figure 8. Predictive mean-squared error for grain yield: bivariate Bayesian LASSO (Bayes L), bivariate GBLUP (RR-BLUP) and bivariate Bayes  $C\pi$ .

Figure 9. Mean-squared error of prediction for rust bin and gall volume in pine trees: bivariate Bayesian LASSO (Bayes L) versus bivariate Bayesian GBLUP (RR-BLUP).

Figure 10. Predictive correlation for rust bin and gall volume in pine trees: bivariate Bayesian LASSO (Bayes L) versus bivariate Bayesian GBLUP (RR-BLUP).

Figure 11. Predictive mean squared error and correlation for gall volume in pine trees: bivariate Bayesian LASSO (MTBayesL) versus univariate Bayesian LASSO (STBayesL)



**Trace plot of residual correlation between traits 1 and 2**  
**12000 samples: Neff=979.0**

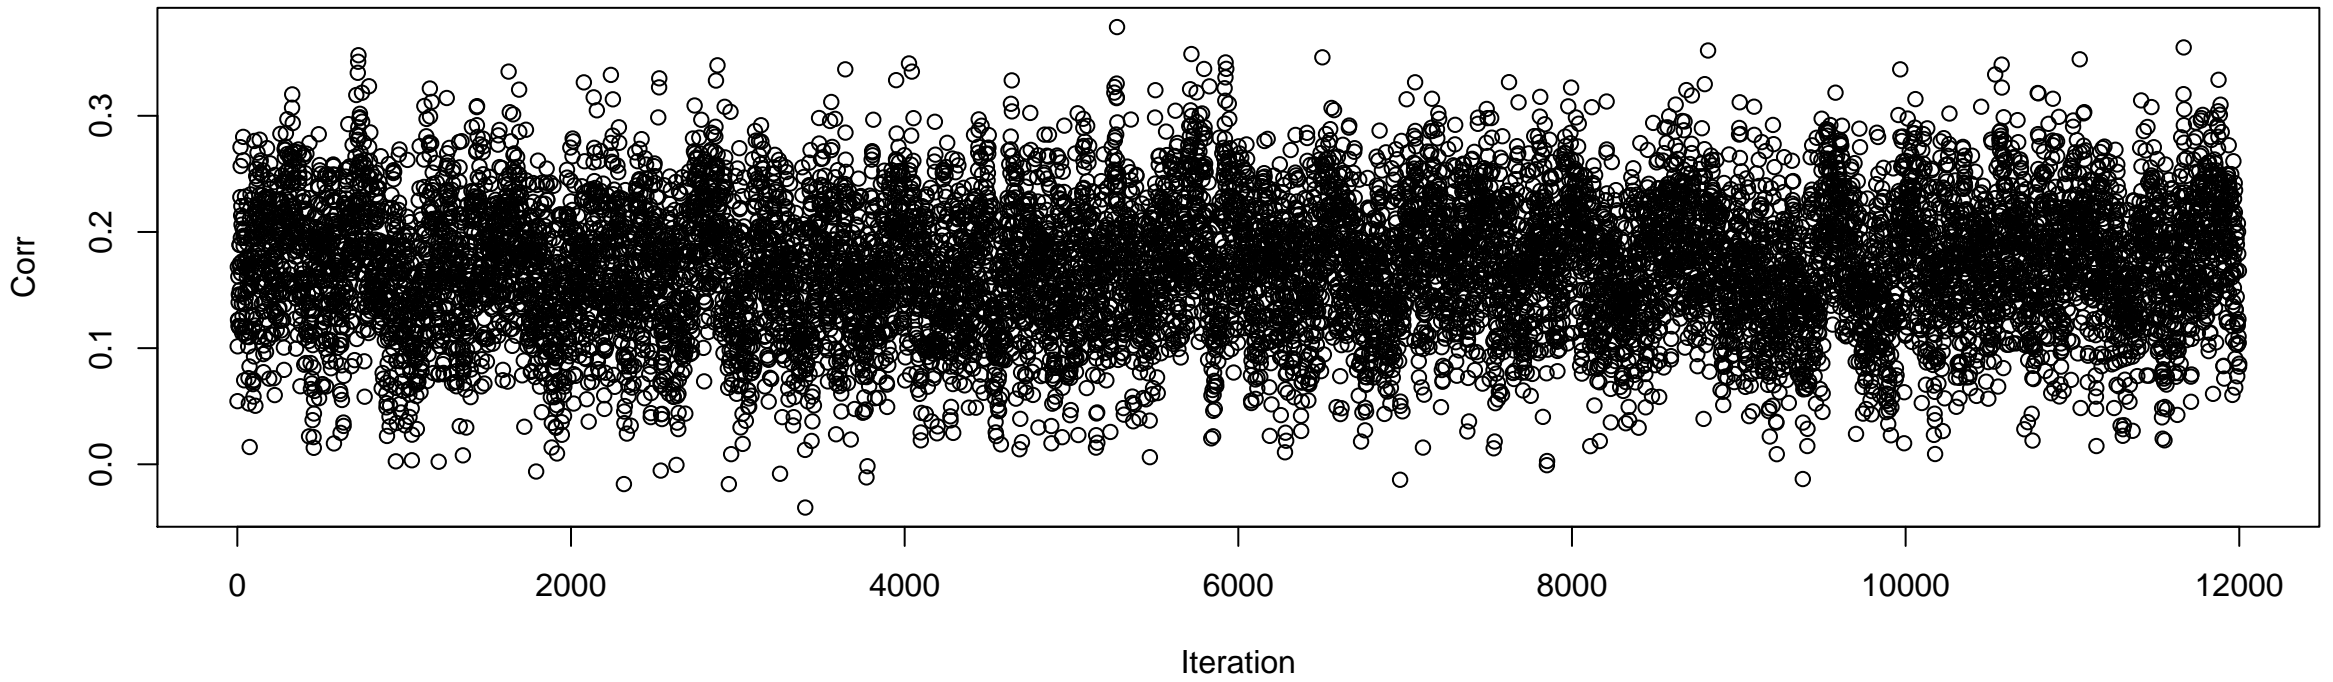

**Posterior density of residual correlation between traits 1 and 2**  
**Mean=0.17 SD=0.06 MCSE=0.005**

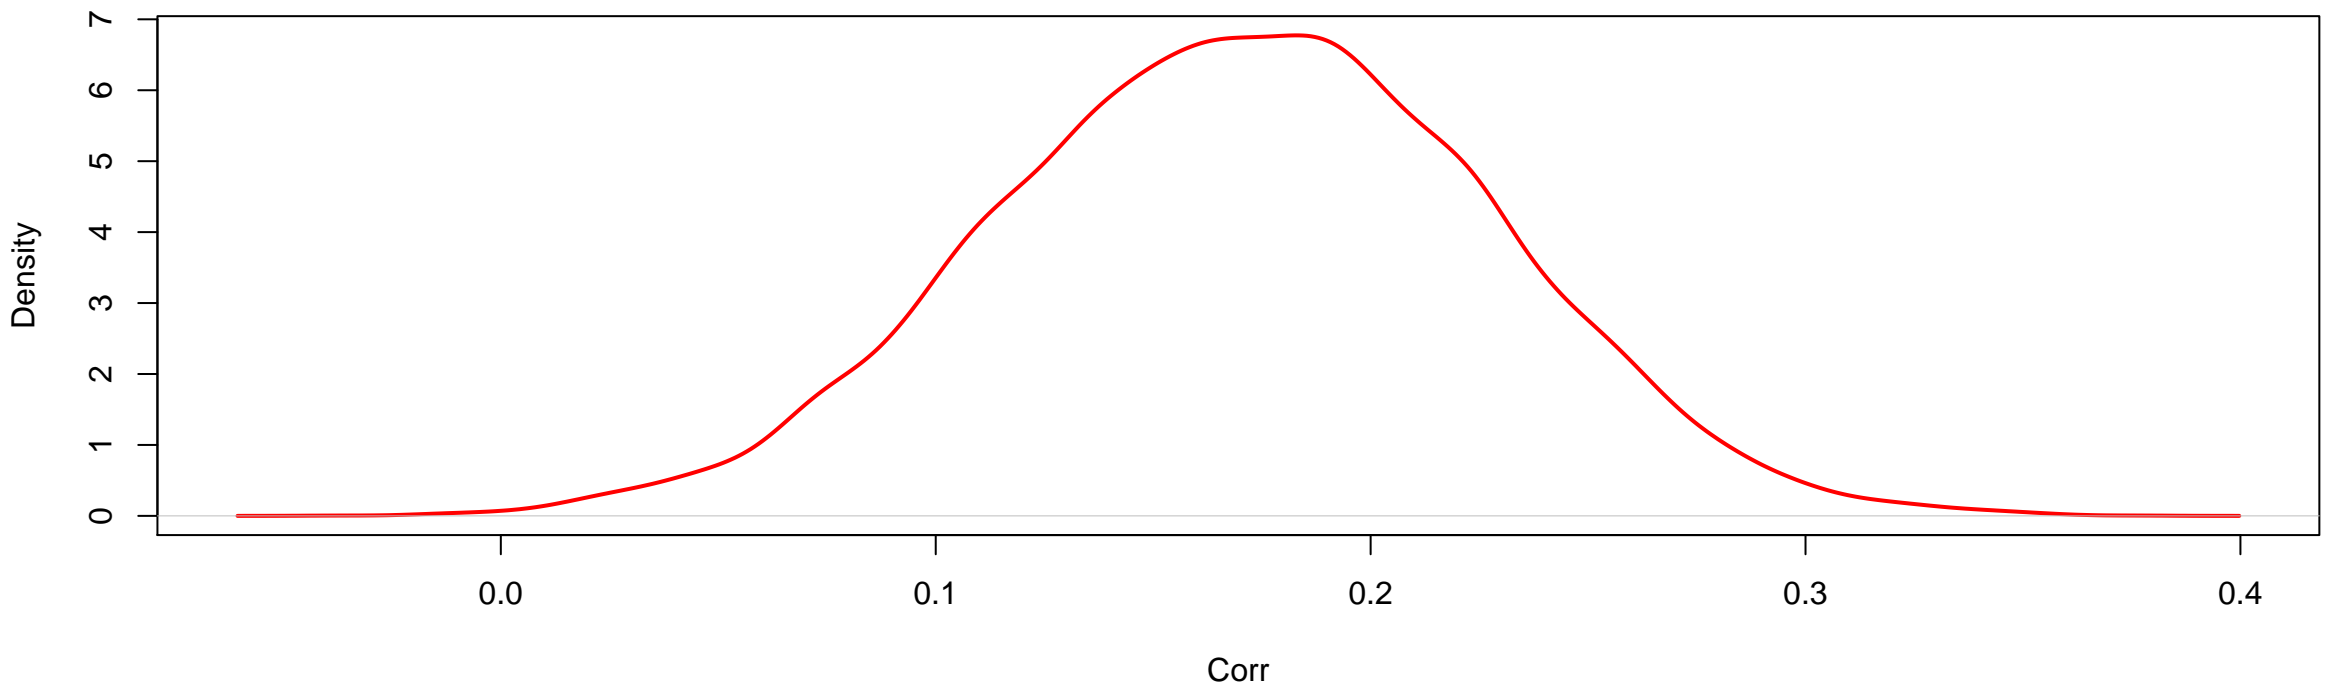

**Trace plot of correlation between marker effects on traits 1 and 2**  
**12000 samples: Neff=220.6**

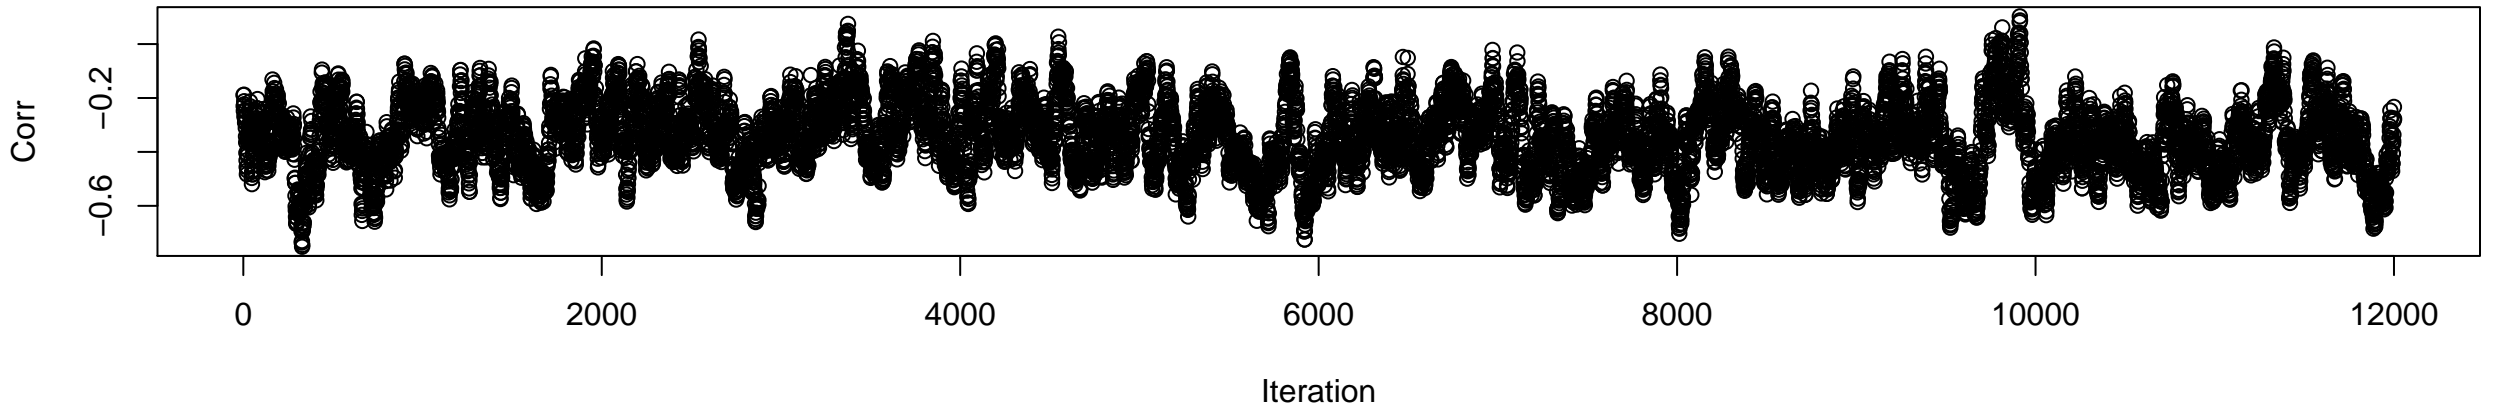

**Posterior density of correlation between marker effects on traits 1 and 2**  
**Mean=-0.35 SD=0.13 MCSE=0.009**

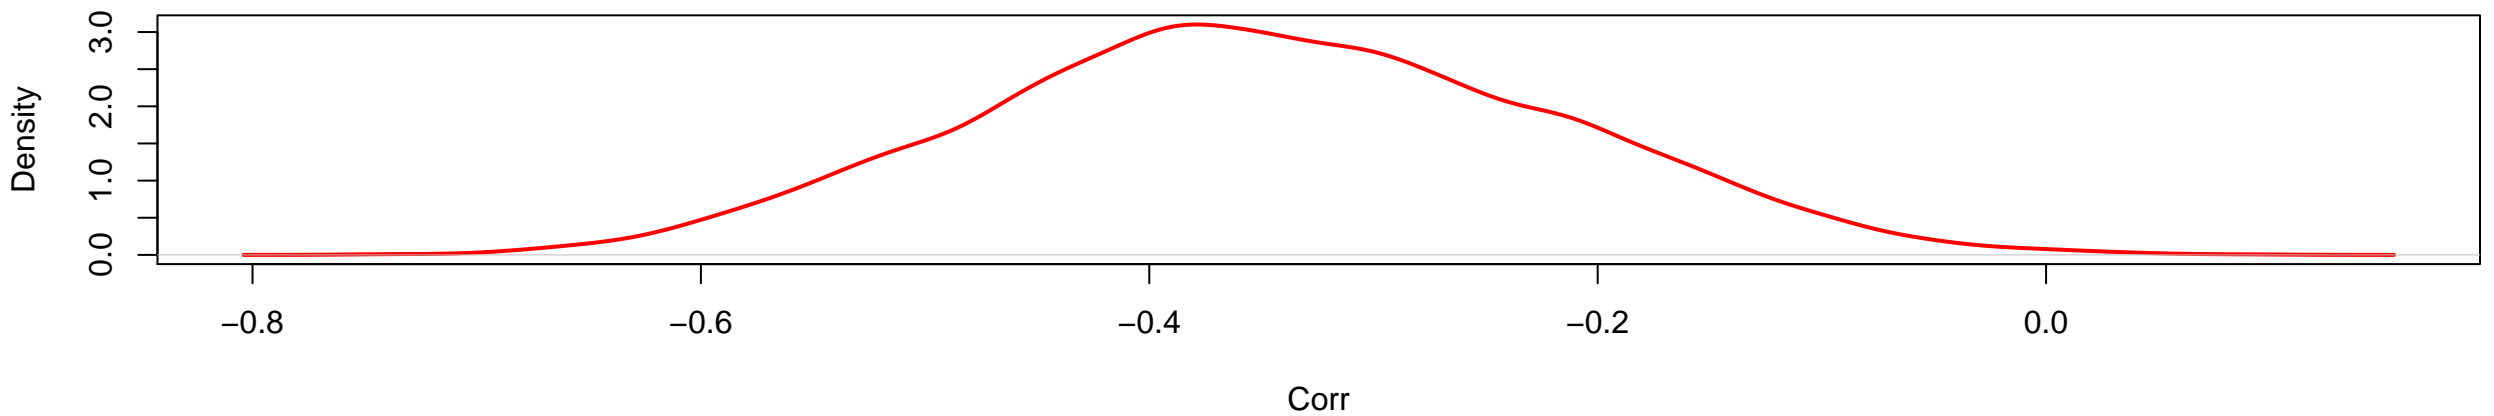

**Bivariate GBLUP vs Bivariate LASSO marker effects: yield 1**

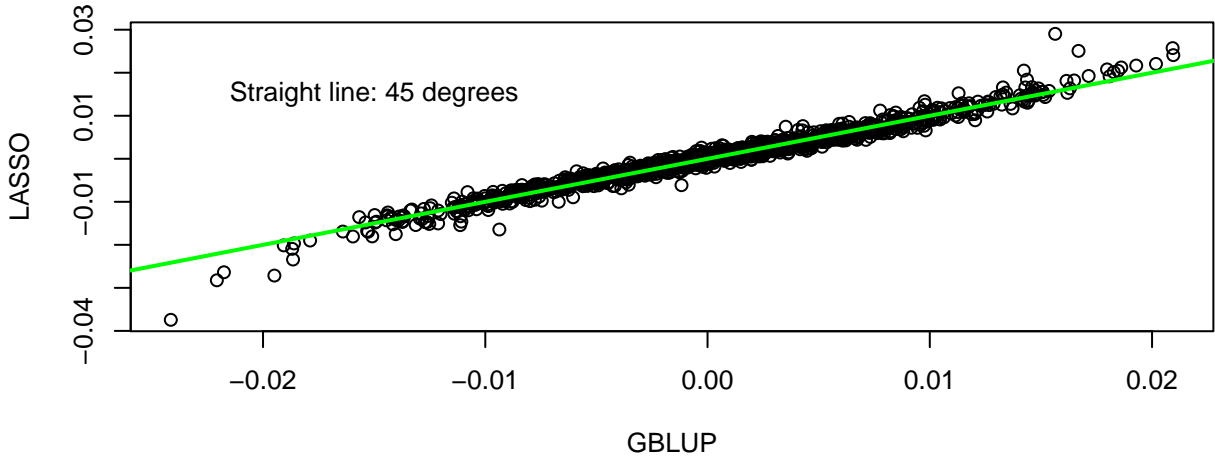

**Bivariate GBLUP vs Bivariate LASSO marker effects: yield 2**

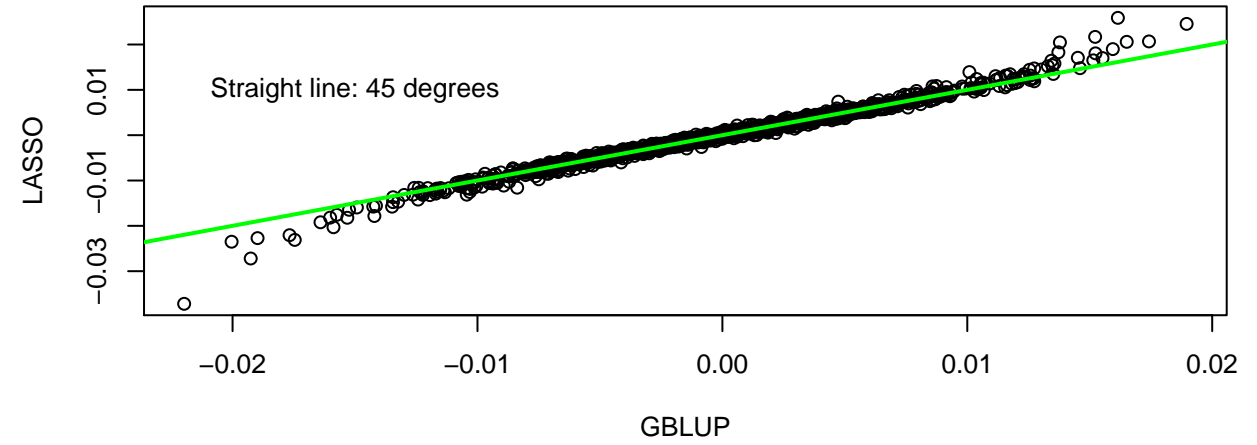

**Bivariate GBLUP vs Bivariate LASSO absolute marker effects: yield 1**

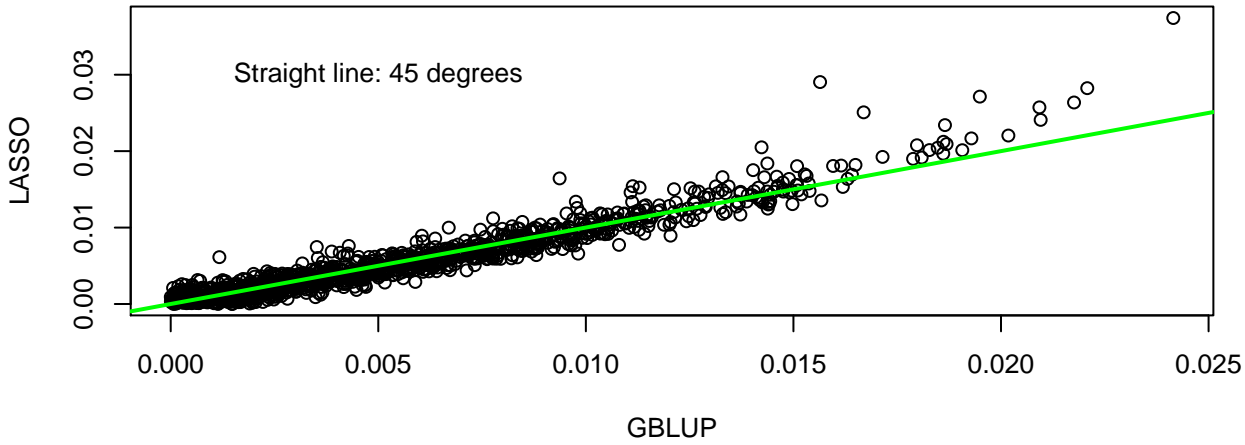

**Bivariate GBLUP vs Bivariate LASSO absolute marker effects: yield 2**

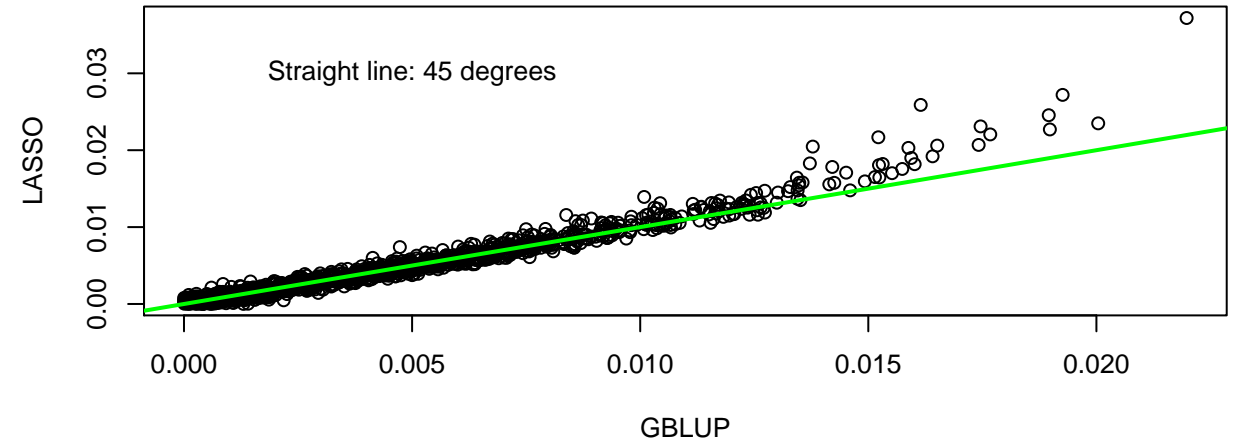

Standardized marker effects (1279) on yield 1: GBLUP vs MBL

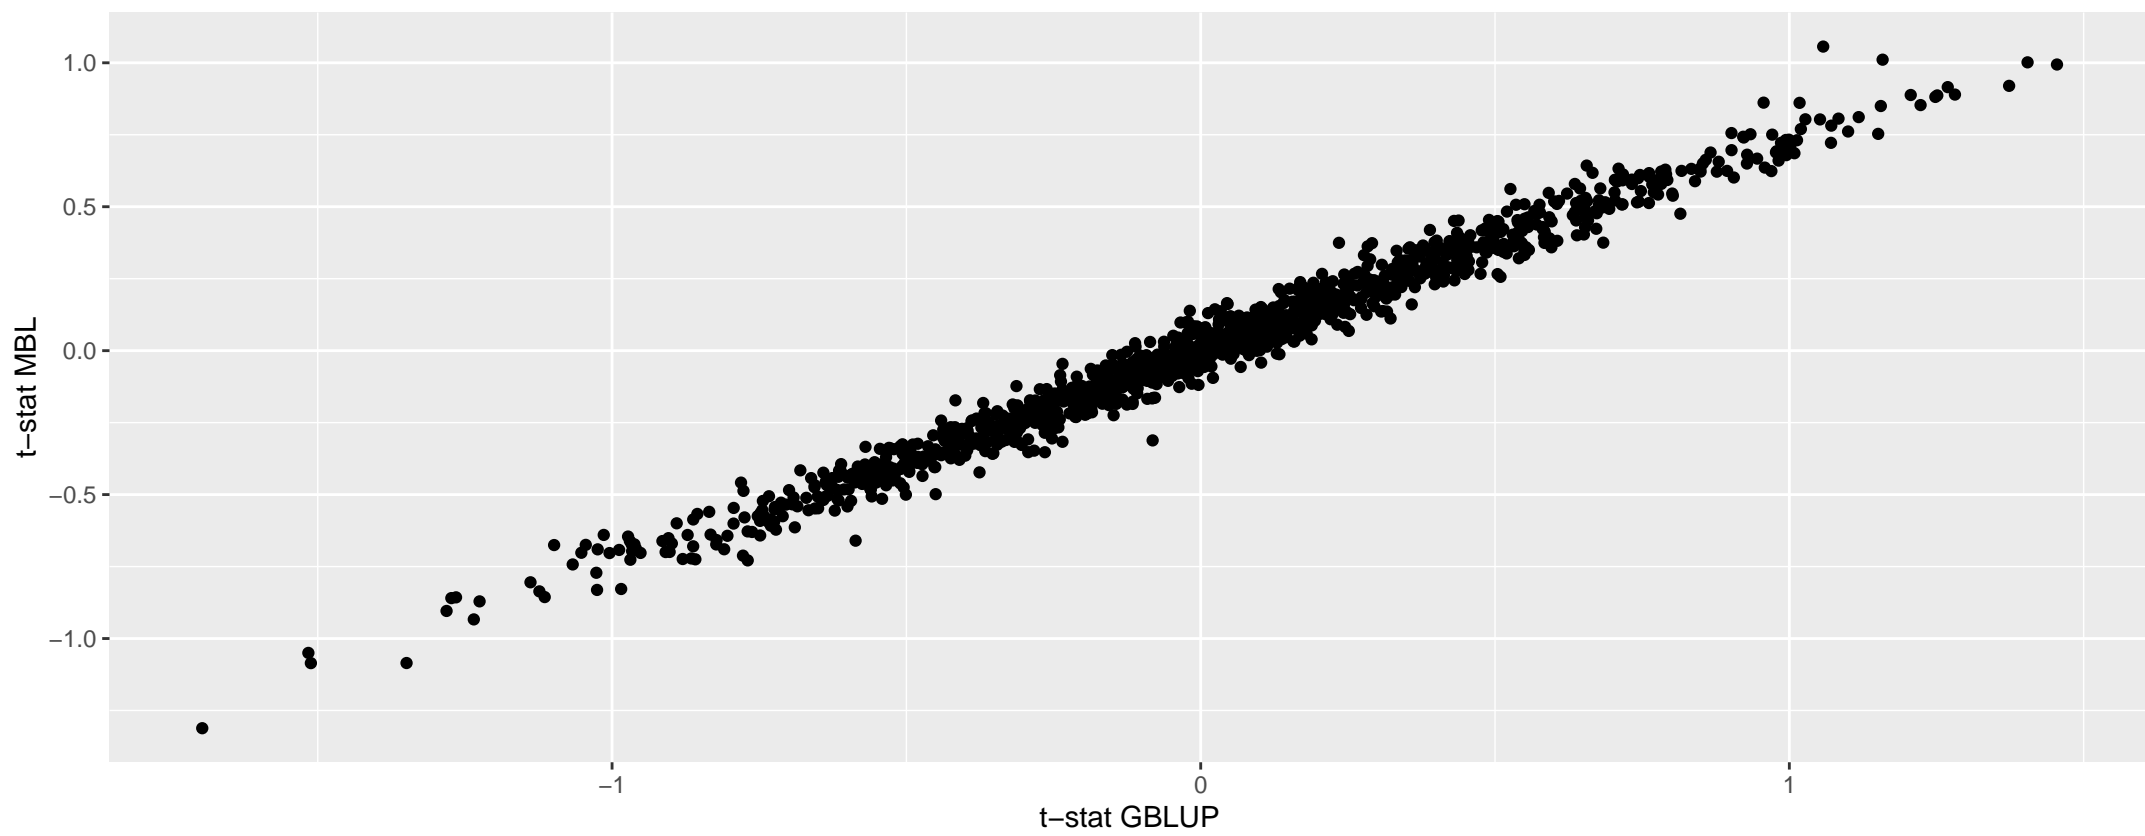

Standardized marker effects (1279) on yield 2: GBLUP vs MBL

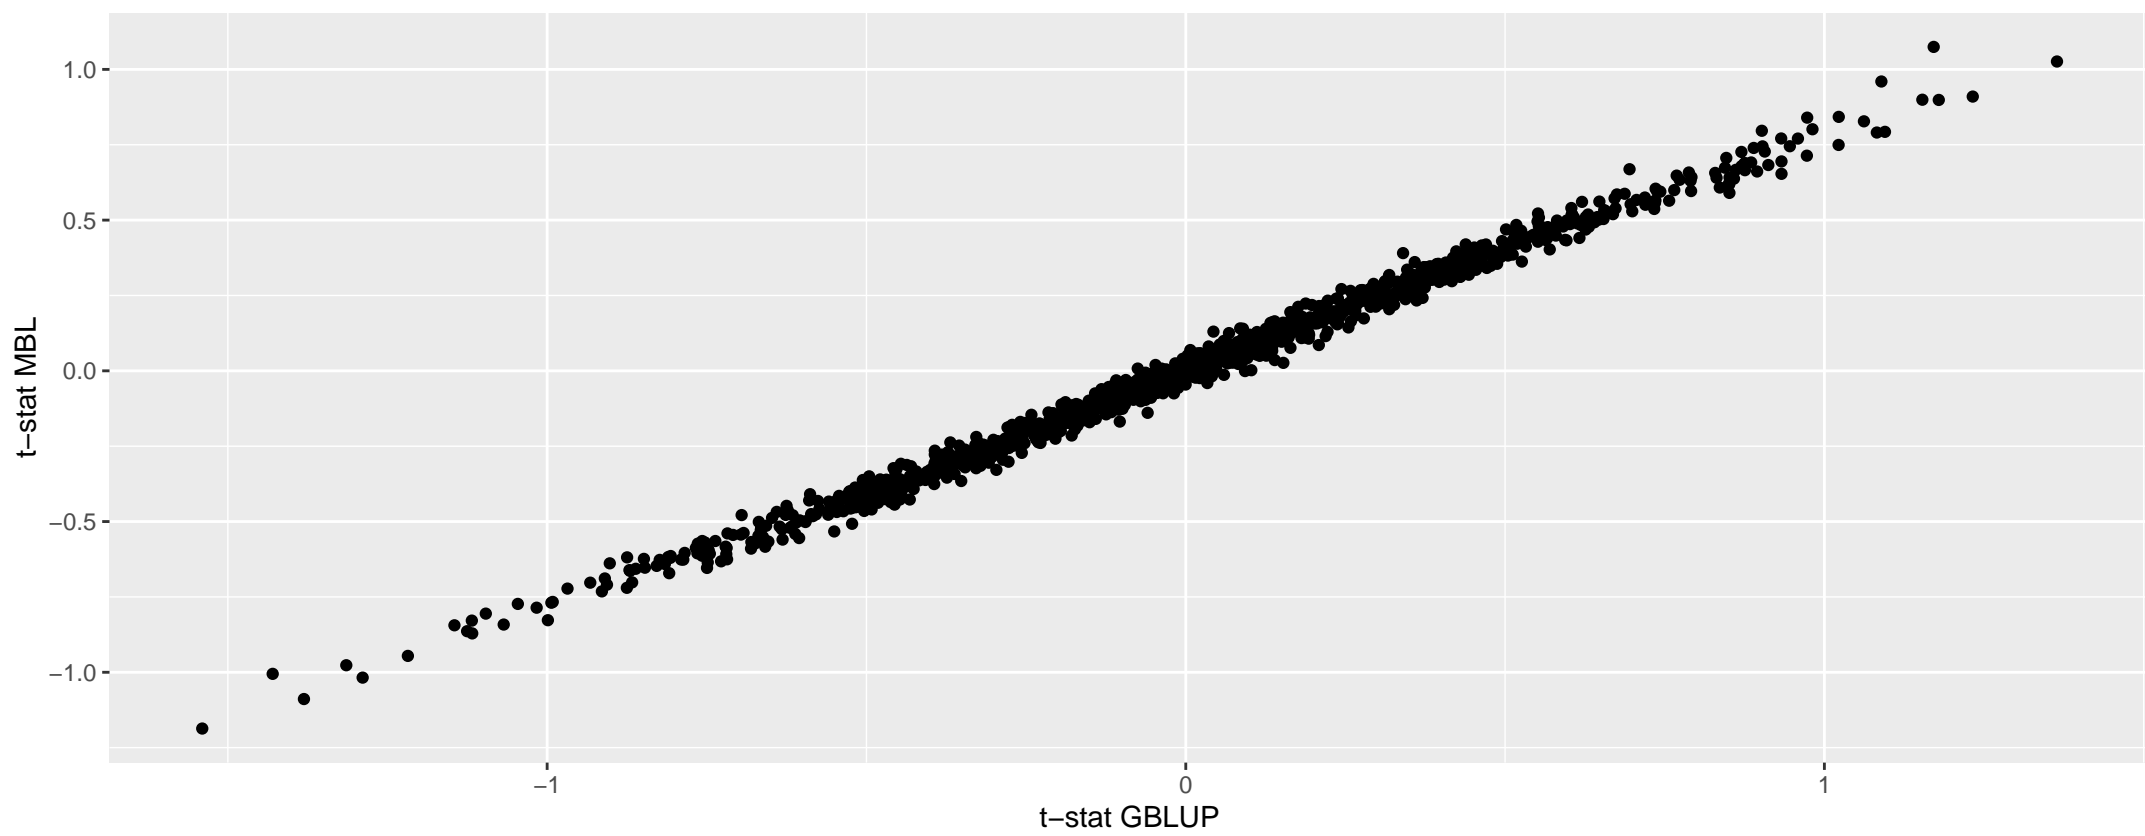

Standardized marker effects (1279) on yield 1: OLS vs MBL

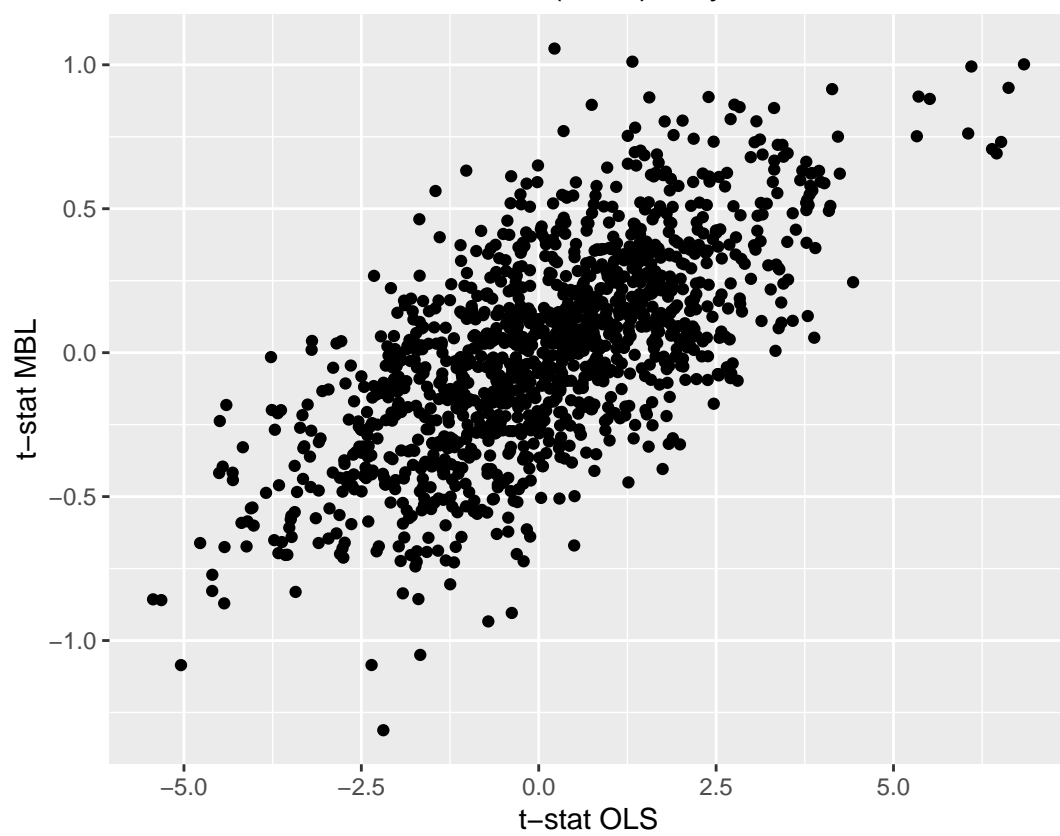

Standardized marker effects (1279) on yield 1: OLS vs BLUP

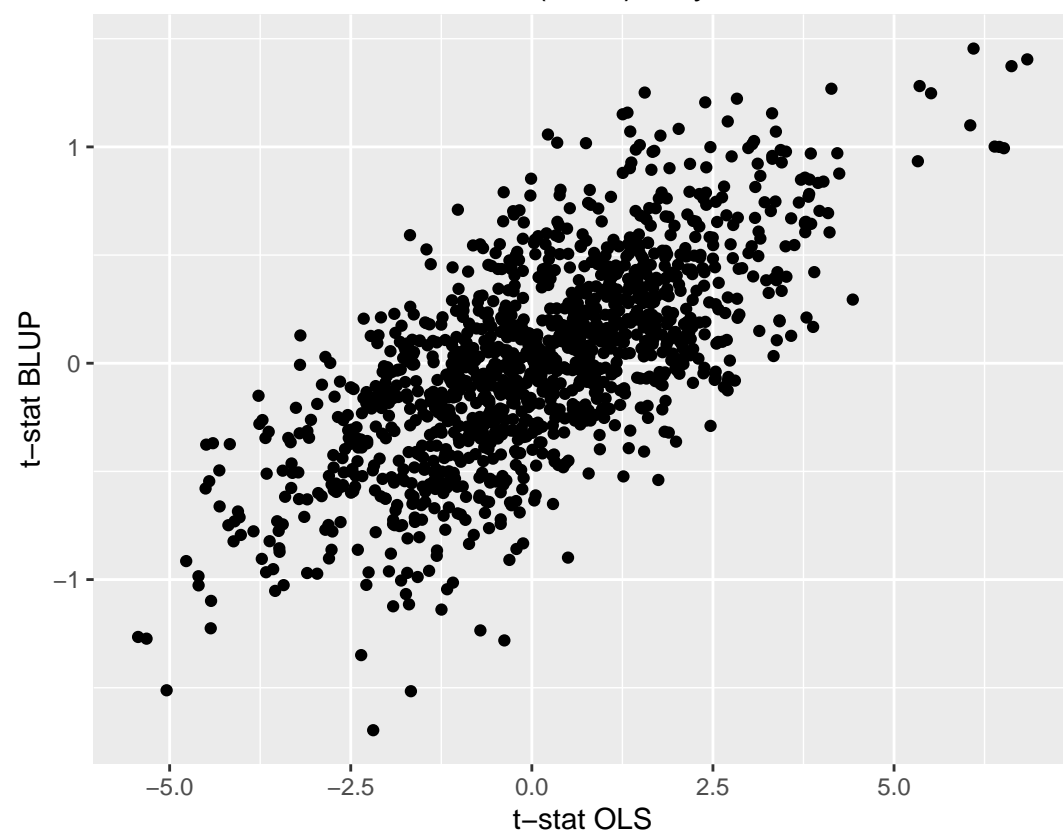

Standardized marker effects (1279) on yield 2: OLS vs MBL

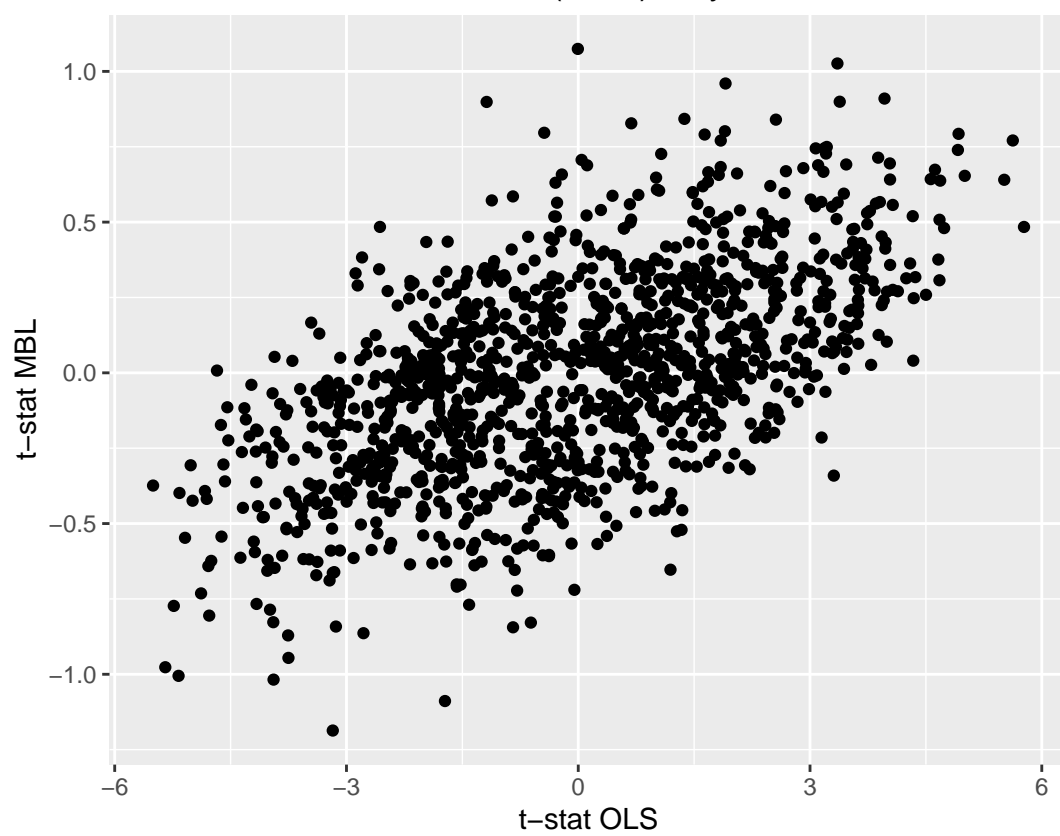

Standardized marker effects (1279) on yield 2: OLS vs BLUP

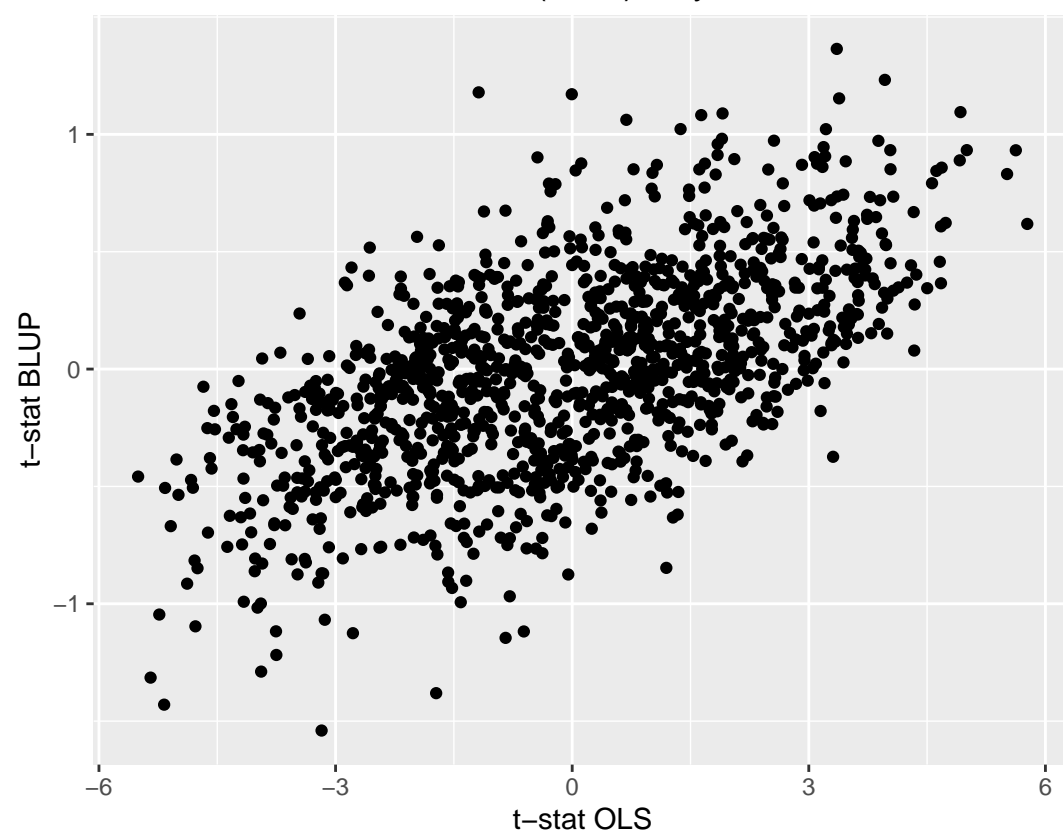

Mahalanobis squared distances (M)  
(45 degree line in black)

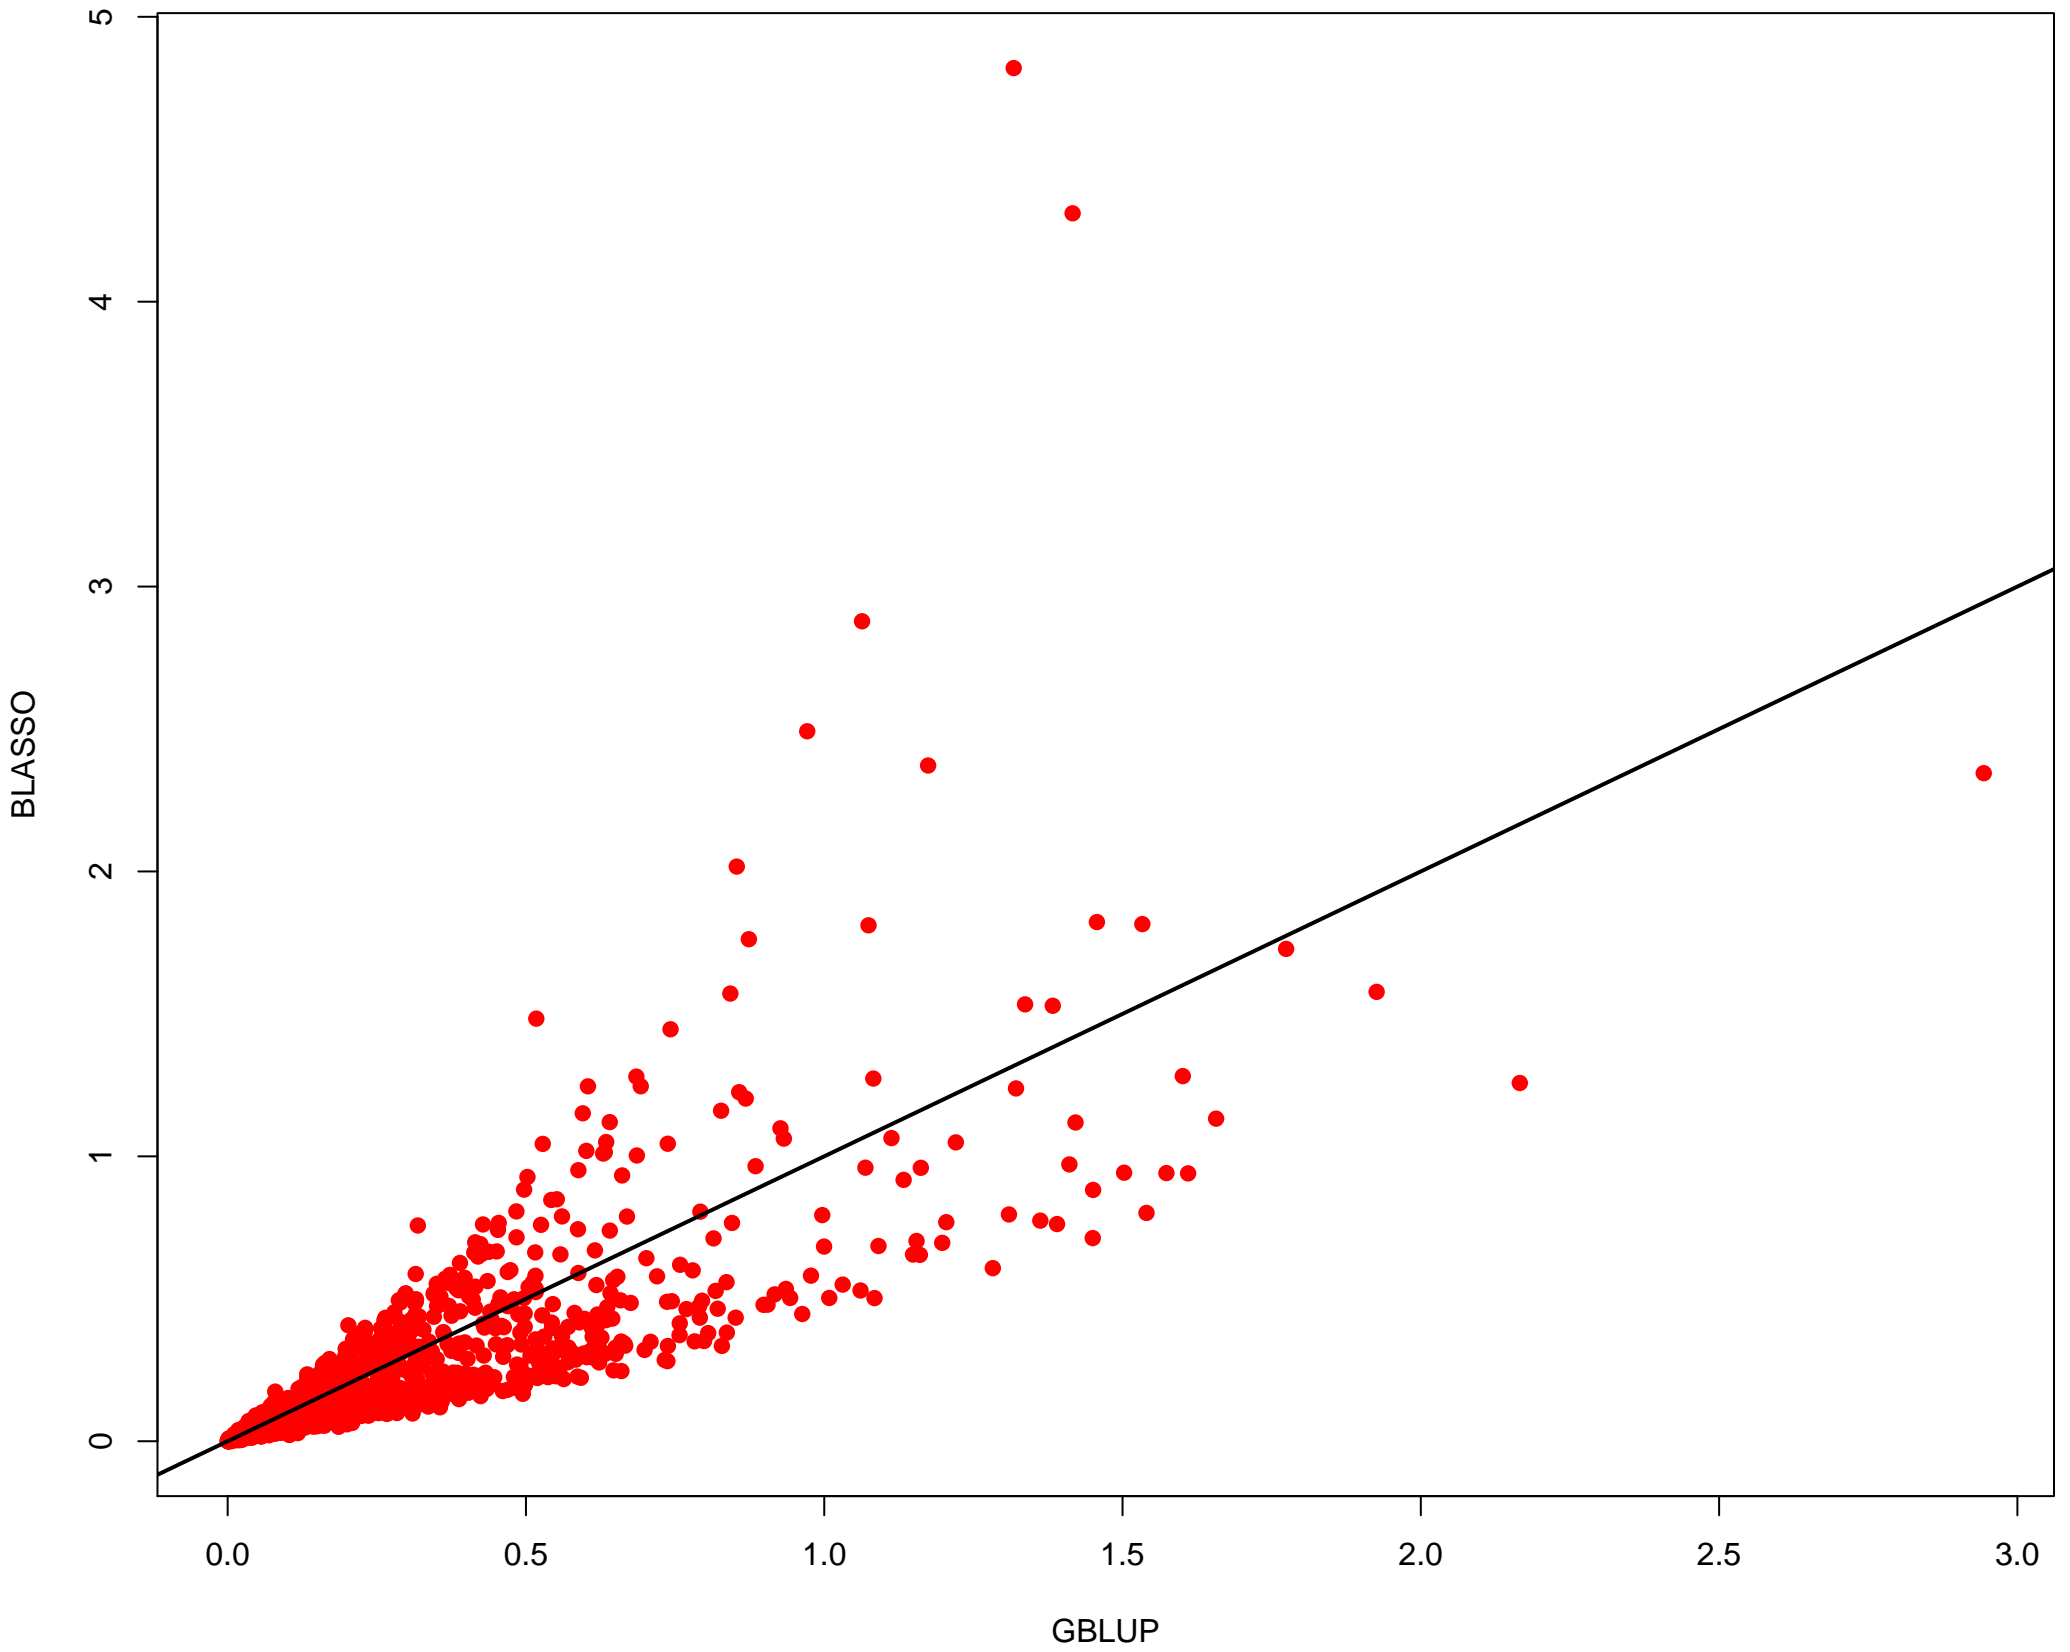

Correlation Between Predictor and Predictand: y1

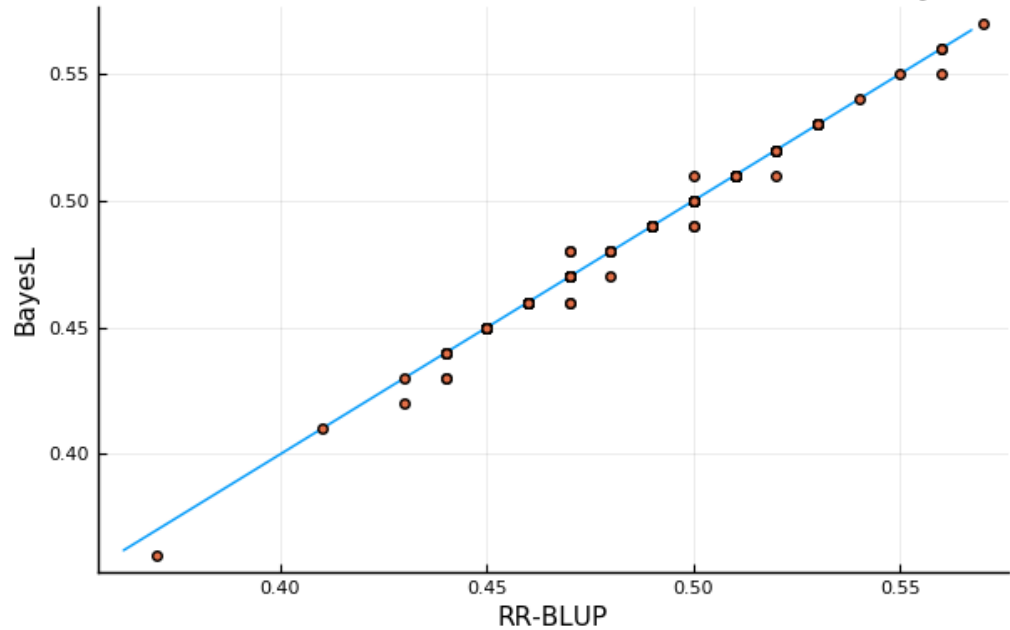

Correlation Between Predictor and Predictand: y1

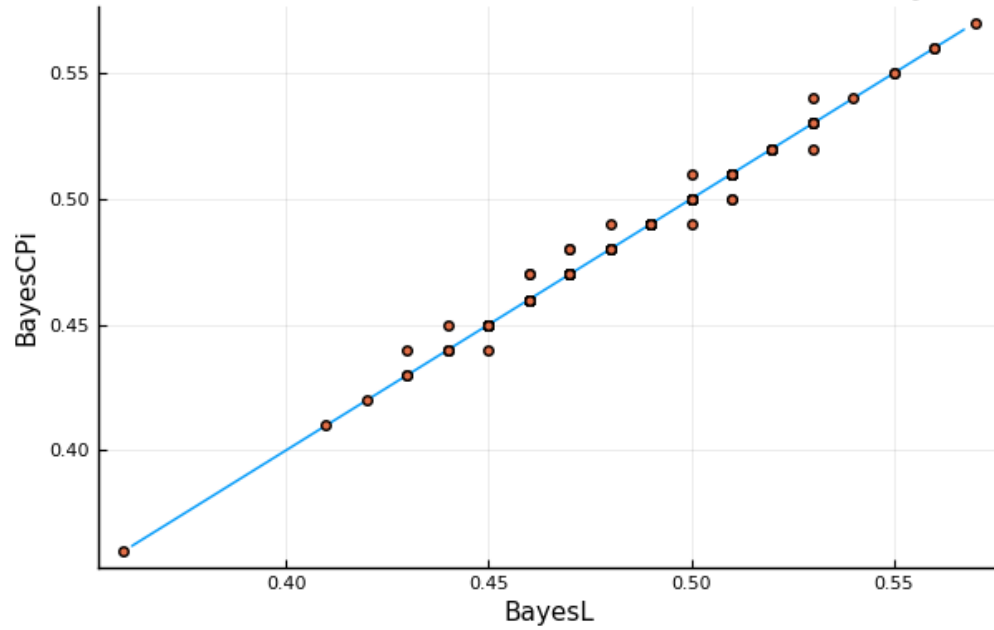

Correlation Between Predictor and Predictand: y2

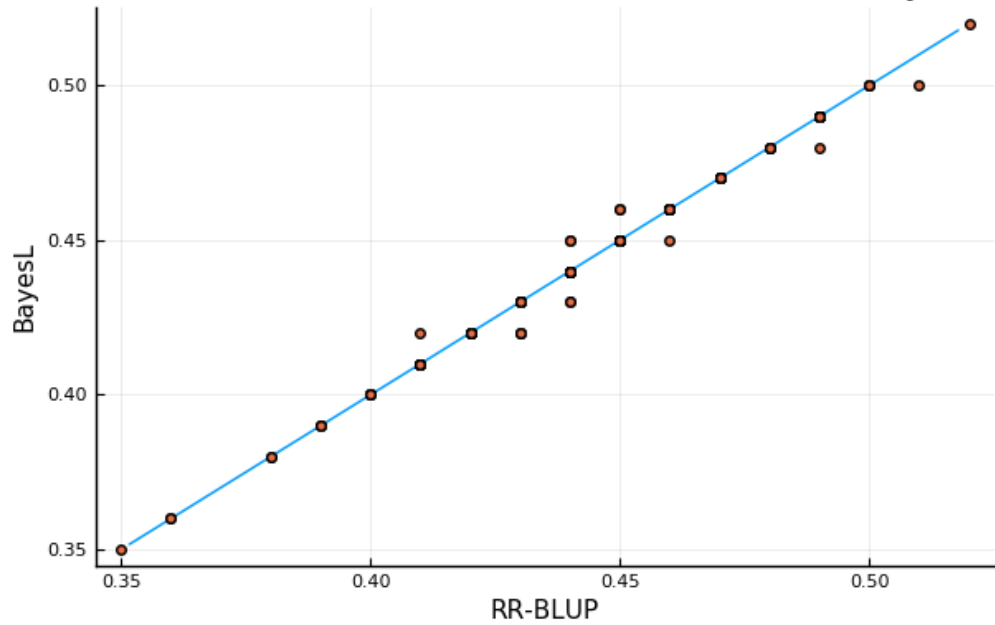

Correlation Between Predictor and Predictand: y2

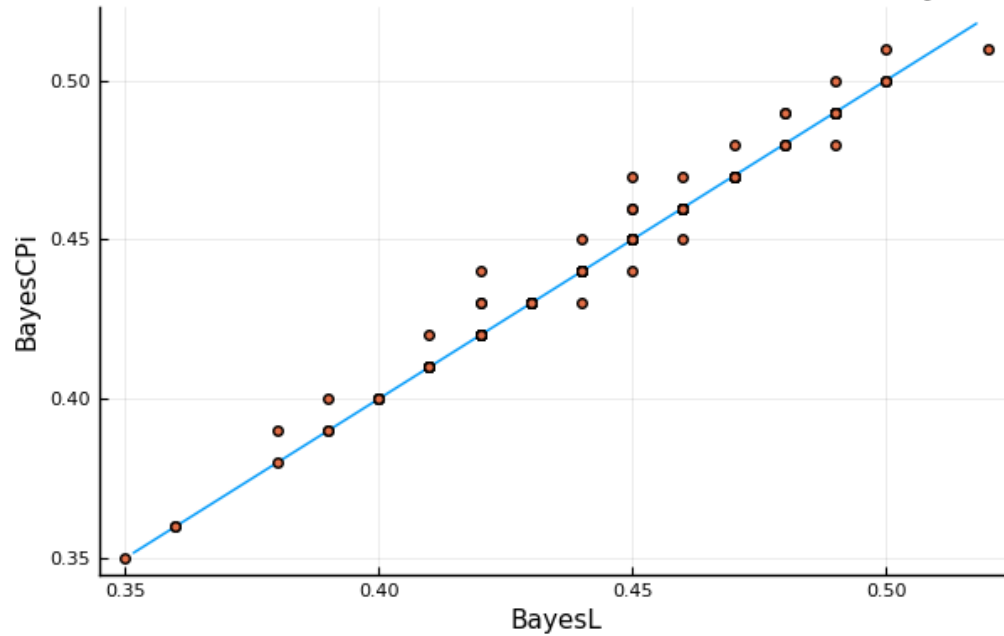

Mean Squared Error of Prediction: y1

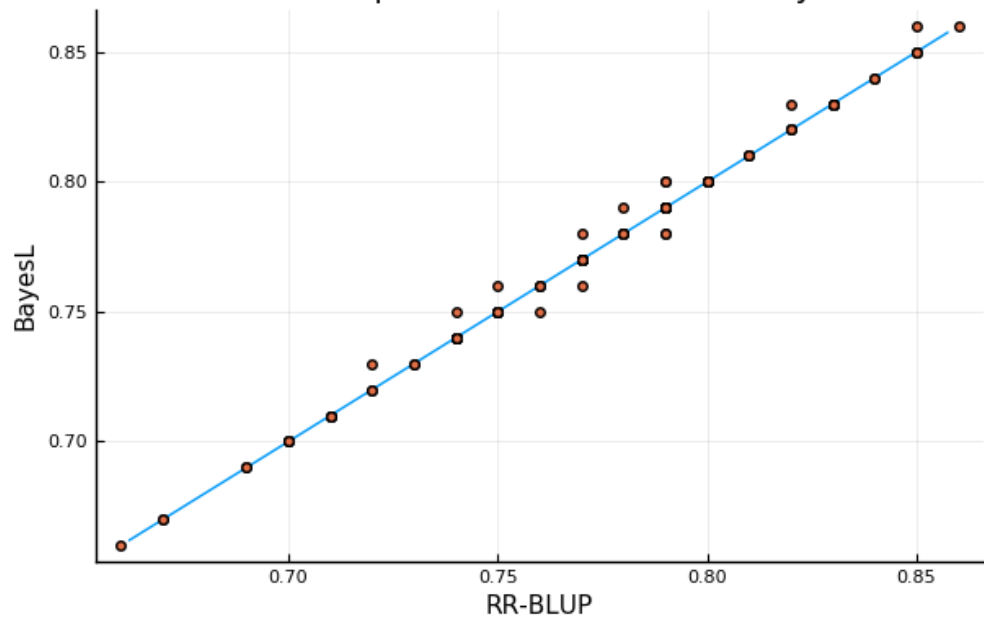

Mean Squared Error of Prediction: y1

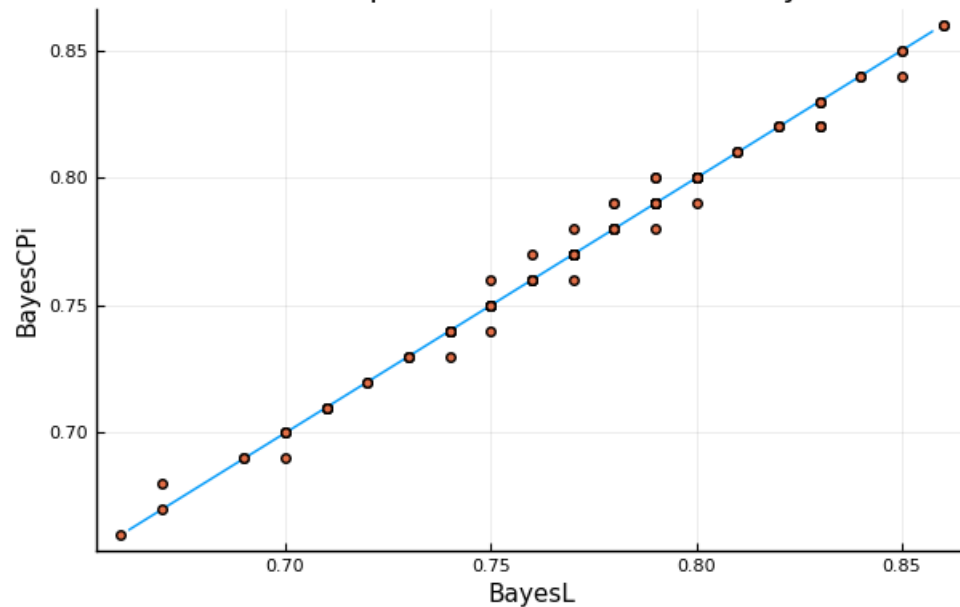

Mean Squared Error of Prediction: y2

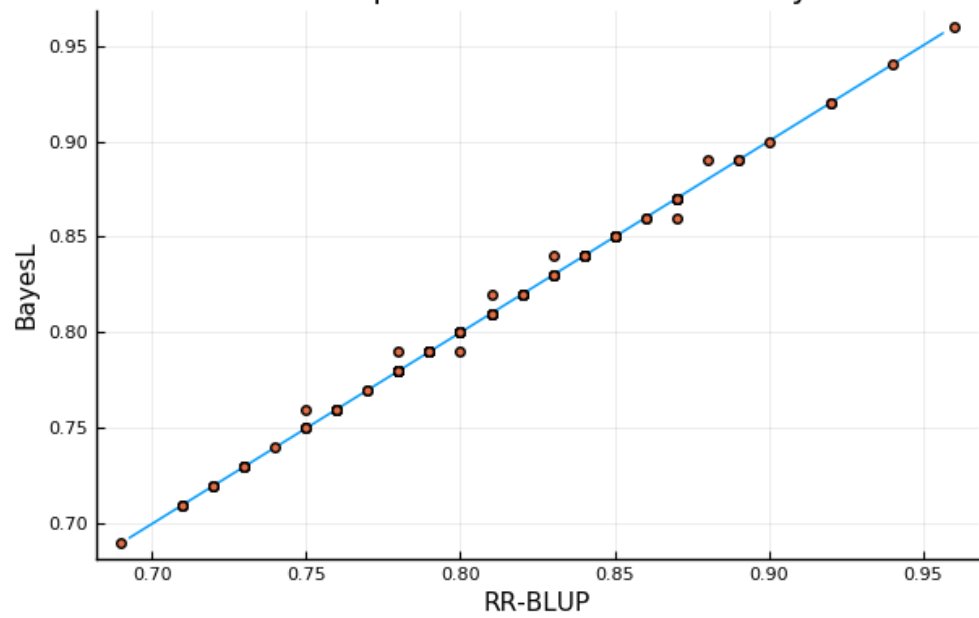

Mean Squared Error of Prediction: y2

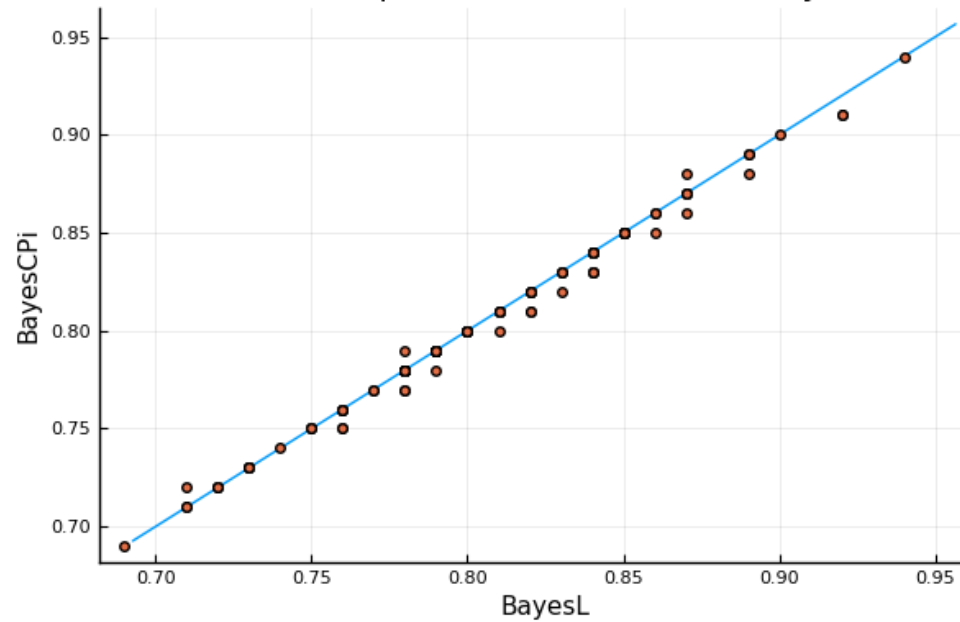



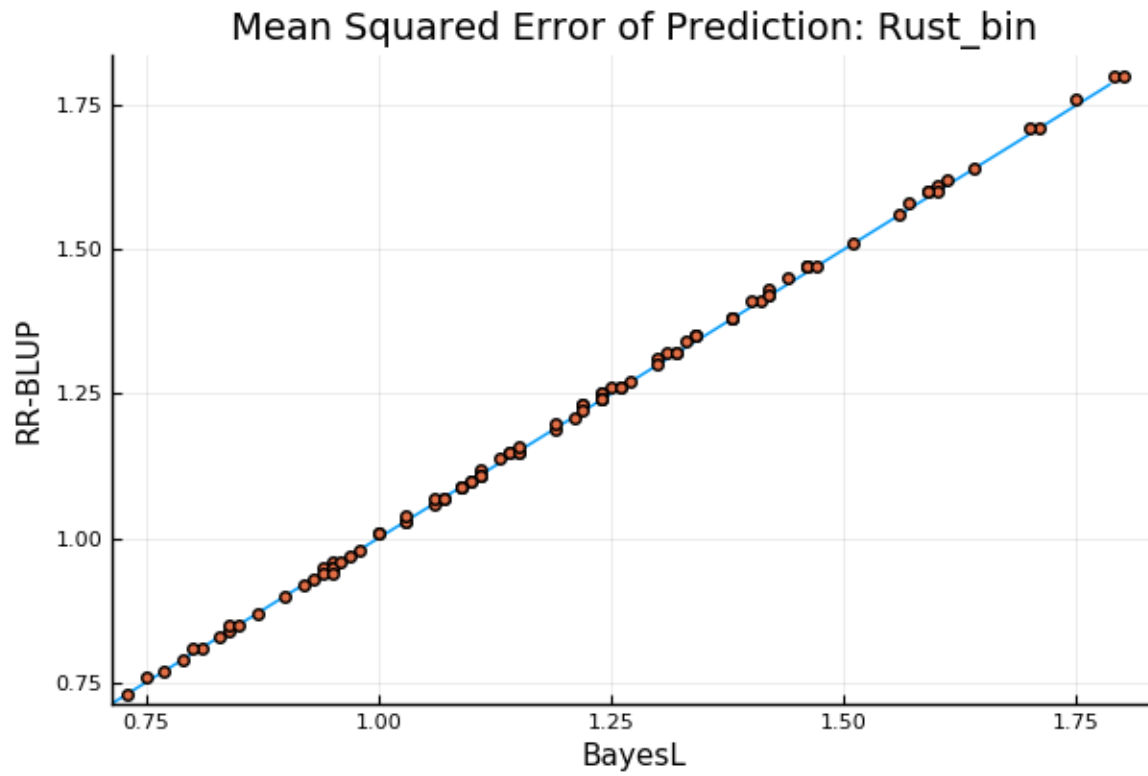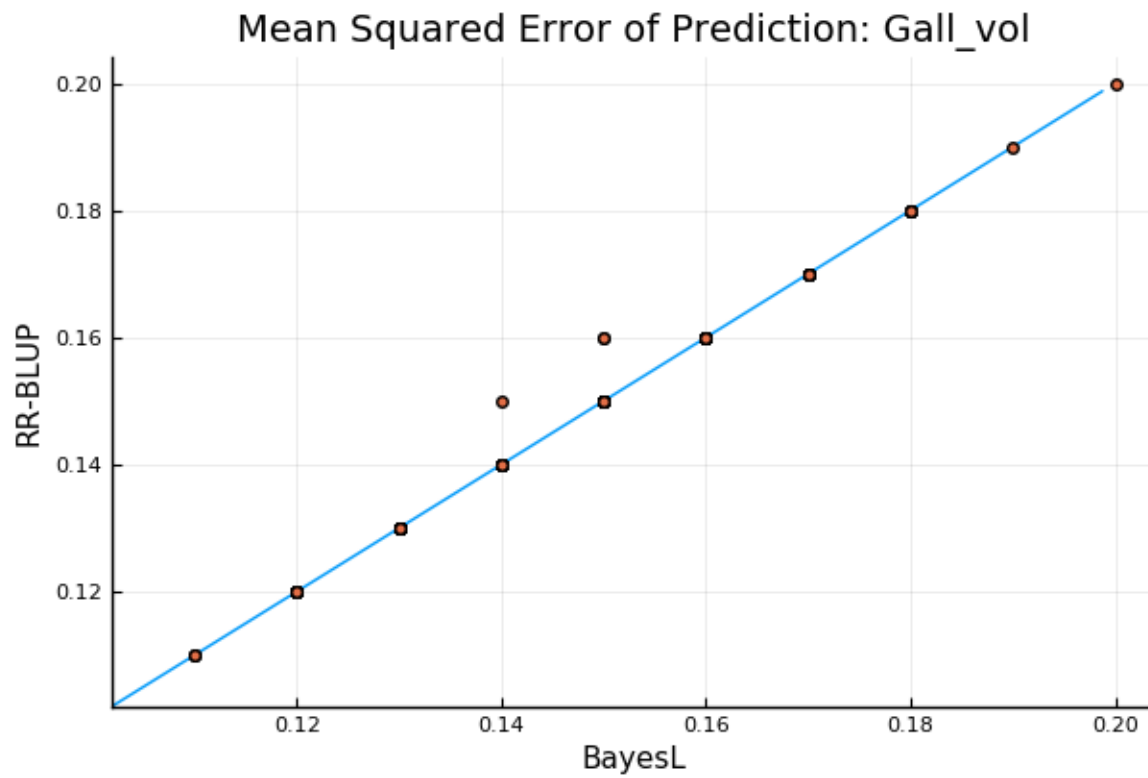

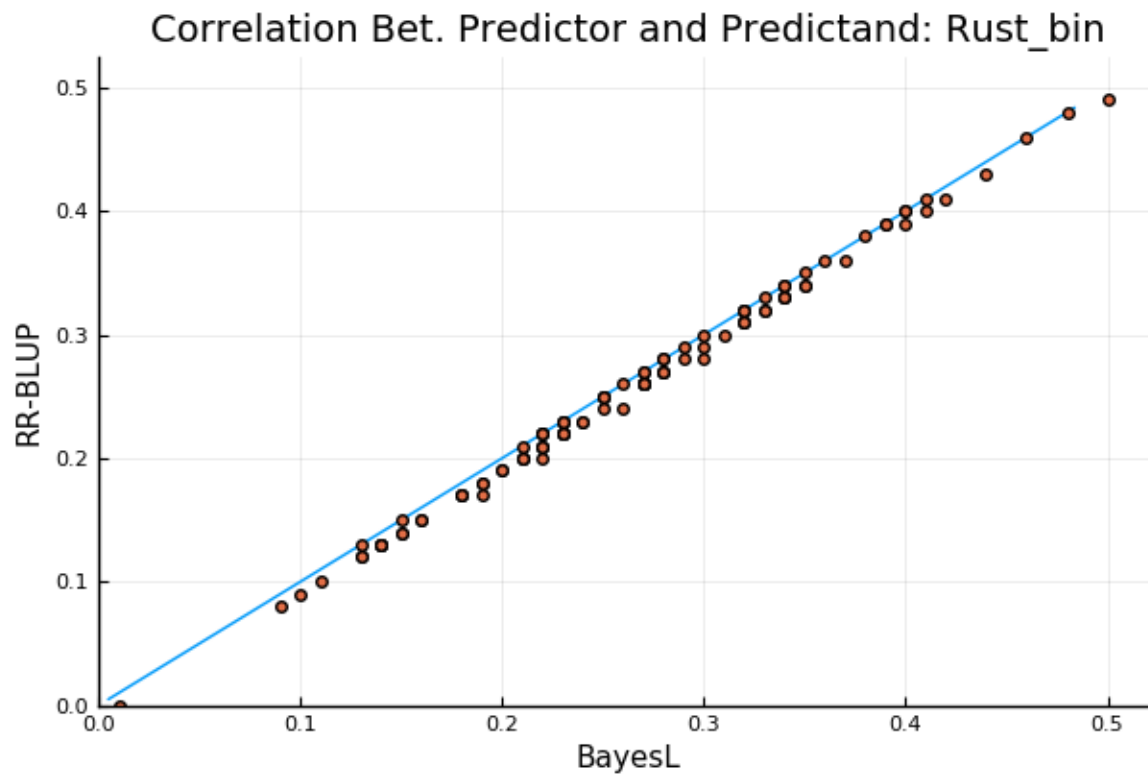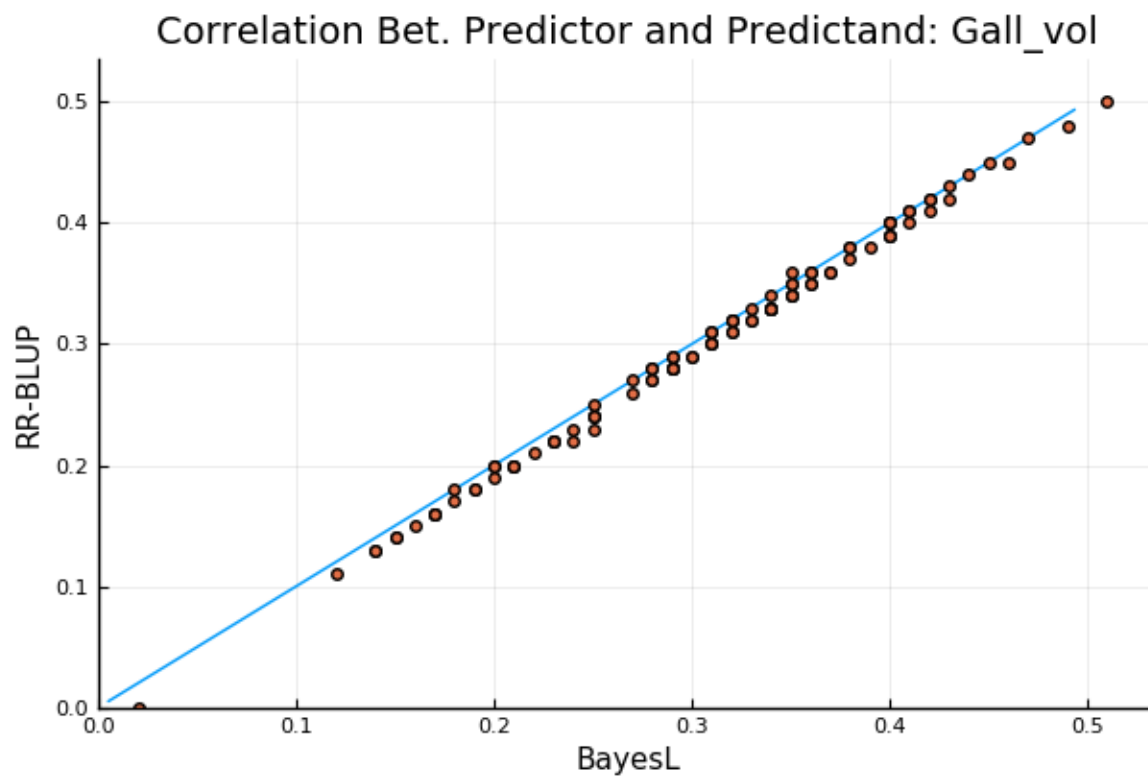

### Mean Squared Error of Prediction: Gall\_vol

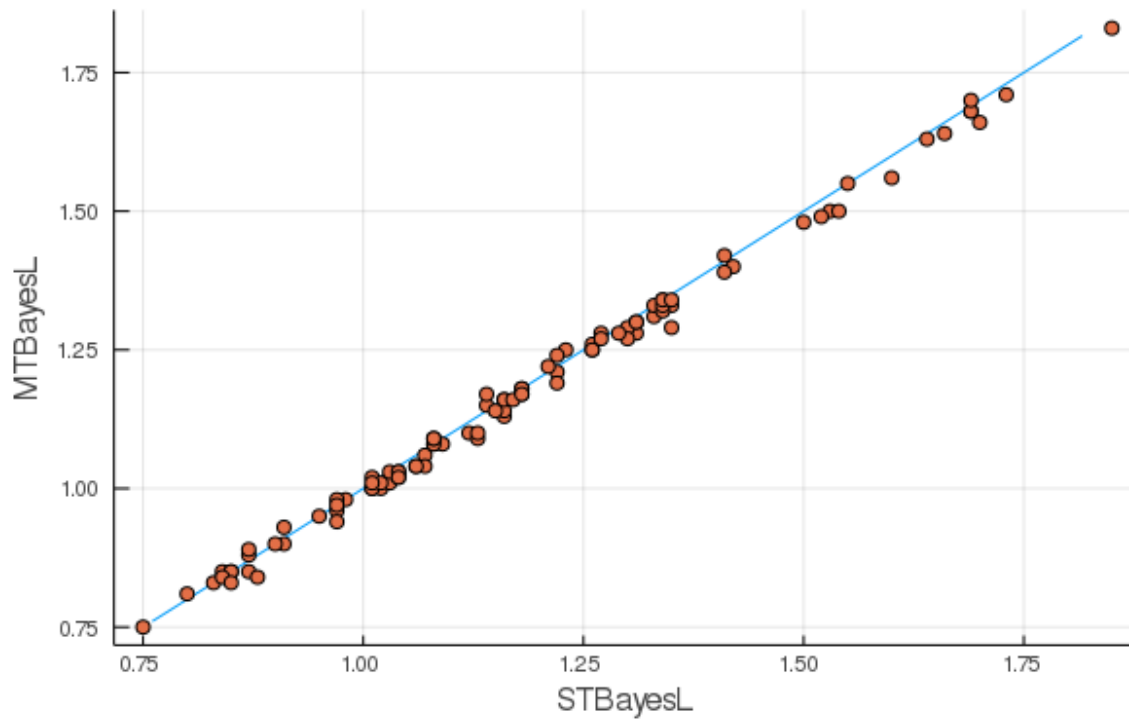

### Correlation Between Predictor and Predictand: Gall\_vol

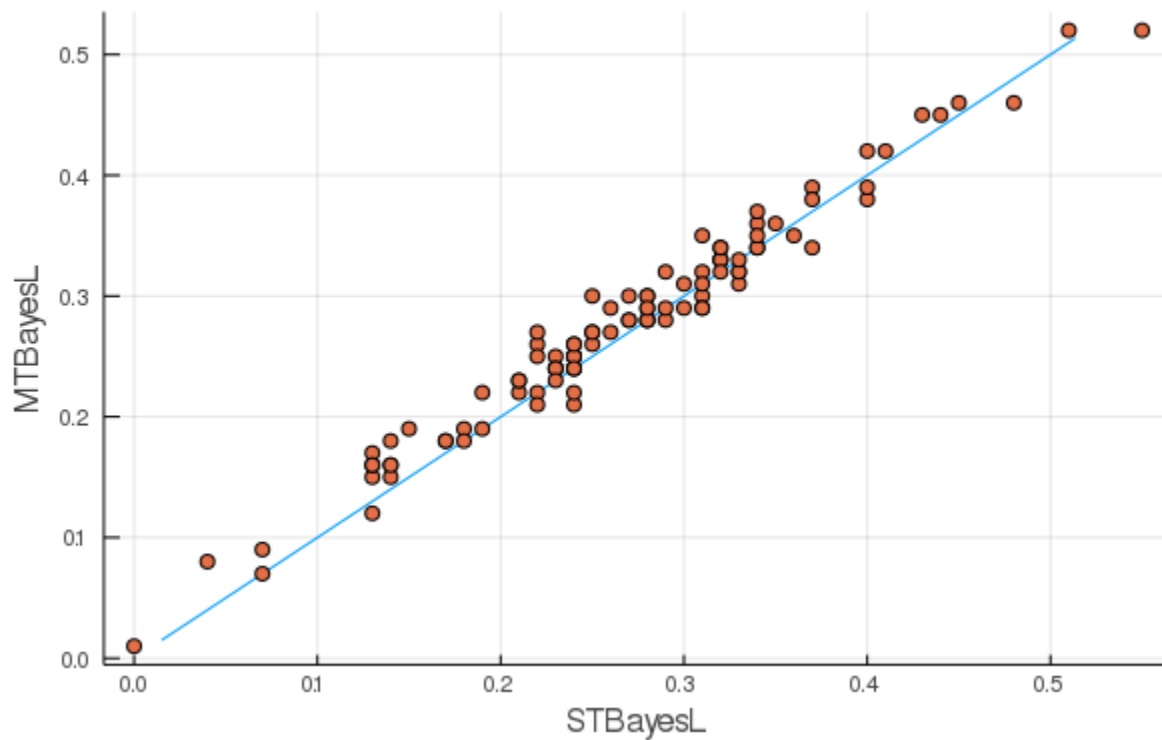

Source: https://www.biorxiv.org/content/10.1101/852749v1.full.pdf
